# Supplementary material for: Postoperative wound dehiscence after laparotomy: a useful healthcare quality indicator? A cohort study based on Norwegian hospital administrative data
Source: PubMed Central journal article supplement — BMJ Open. 2019 Apr 3;9(4):e026422. doi: 10.1136/bmjopen-2018-026422 (PMC6500227; doi:10.1136/bmjopen-2018-026422), 2019-04-03
Supplement: bmjopen-2018-026422.draft_revisions.pdf [file bmjopen-2018-026422.draft_revisions.pdf]

# BMJ Open

BMJ Open is committed to open peer review. As part of this commitment we make the peer review history of every article we publish publicly available.

When an article is published we post the peer reviewers' comments and the authors' responses online. We also post the versions of the paper that were used during peer review. These are the versions that the peer review comments apply to.

The versions of the paper that follow are the versions that were submitted during the peer review process. They are not the versions of record or the final published versions. They should not be cited or distributed as the published version of this manuscript.

BMJ Open is an open access journal and the full, final, typeset and author-corrected version of record of the manuscript is available on our site with no access controls, subscription charges or pay-per-view fees (<http://bmjopen.bmj.com>).

If you have any questions on BMJ Open's open peer review process please email [editorial.bmjopen@bmj.com](mailto:editorial.bmjopen@bmj.com)

# BMJ Open

## POSTOPERATIVE WOUND DEHISCENCE AFTER LAPAROTOMY: A USEFUL HEALTH CARE QUALITY INDICATOR? A COHORT STUDY BASED ON NORWEGIAN HOSPITAL ADMINISTRATIVE DATA

|                               |                                                                                                                                                                                                                                                                                                                                                                                                                                                                                                                                                                                                                                 |
|-------------------------------|---------------------------------------------------------------------------------------------------------------------------------------------------------------------------------------------------------------------------------------------------------------------------------------------------------------------------------------------------------------------------------------------------------------------------------------------------------------------------------------------------------------------------------------------------------------------------------------------------------------------------------|
| Journal:                      | <i>BMJ Open</i>                                                                                                                                                                                                                                                                                                                                                                                                                                                                                                                                                                                                                 |
| Manuscript ID                 | bmjopen-2018-026422                                                                                                                                                                                                                                                                                                                                                                                                                                                                                                                                                                                                             |
| Article Type:                 | Research                                                                                                                                                                                                                                                                                                                                                                                                                                                                                                                                                                                                                        |
| Date Submitted by the Author: | 31-Aug-2018                                                                                                                                                                                                                                                                                                                                                                                                                                                                                                                                                                                                                     |
| Complete List of Authors:     | Helgeland , Jon ; Norwegian Institute of Public Health, Division of Health Services<br>Tomic, Oliver; Norwegian University of Life Sciences, Department of Mathematic Sciences and Technology<br>Hansen, Tonya; Norwegian Institute of Public Health, Division of Health Services<br>Kristoffersen, Doris; Norwegian Institute of Public Health, Division of Health Services<br>Hassani, Sahar; Oslo University Hospital, Department of Medical Genetics; University of Oslo, KG Jebsen Centre for Psychosis Research, Institute of Clinical Medicine<br>Lindahl, Anne; Akershus University Hospital Trust, Division of Surgery |
| Keywords:                     | Quality in health care < HEALTH SERVICES ADMINISTRATION & MANAGEMENT, SURGERY, Patient safety                                                                                                                                                                                                                                                                                                                                                                                                                                                                                                                                   |
|                               |                                                                                                                                                                                                                                                                                                                                                                                                                                                                                                                                                                                                                                 |

SCHOLARONE™  
Manuscripts

1  
2  
3  
4 1 **POSTOPERATIVE WOUND DEHISCENCE AFTER LAPAROTOMY: A**  
5  
6  
7 2 **USEFUL HEALTH CARE QUALITY INDICATOR? A COHORT STUDY**  
8  
9  
10 3 **BASED ON NORWEGIAN HOSPITAL ADMINISTRATIVE DATA**

11  
12 4 Jon Helgeland<sup>1,6</sup>, Oliver Tomic<sup>2</sup>, Tonya Moen Hansen<sup>1</sup>, Doris Tove Kristoffersen<sup>1</sup>, Sahar Hassani<sup>3,4</sup>,  
13  
14 5 Anne Karin Lindahl<sup>5</sup>

15  
16 6 <sup>1</sup> Division of Health Services, Norwegian Institute of Public Health, Oslo, Norway

17  
18 7 <sup>2</sup> Department of Mathematical Sciences and Technology, Norwegian University of Life Sciences, Ås,  
19  
20 8 Norway

21  
22 9 <sup>3</sup> Department of Medical Genetics, Oslo University Hospital, Oslo, Norway

23  
24 10 <sup>4</sup> NORMENT, KG Jebsen Centre for Psychosis Research, Institute of Clinical Medicine, University of  
25  
26 11 Oslo, Oslo, Norway

27  
28 12 <sup>5</sup> Division of Surgery, Akershus University Hospital Trust

29  
30 13 <sup>6</sup>Corresponding author: Jon Helgeland, [jon.helgeland@fhi.no](mailto:jon.helgeland@fhi.no)

31  
32  
33 14

34  
35 15 Word count: 2643

36  
37  
38 16

## 17 **ABSTRACT**

### 18 **Objectives**

19 Postoperative wound dehiscence (PWD) is a serious complication to laparotomy, leading to higher  
20 mortality, readmissions and cost. The aims of the present study are to investigate whether risk  
21 adjusted PWD rates could reliably differentiate between Norwegian hospitals, and whether PWD  
22 rates were associated with hospital characteristics such as hospital type and laparotomy volume.

### 23 **Design**

24 Observational study using patient administrative data from all Norwegian hospitals, obtained from  
25 the Norwegian Patient Registry, for the period 2011-2015, and linked using the unique person  
26 identification number.

### 27 **Participants**

28 All patients undergoing laparotomy, at least 15 years old, with length of stay at least two days, and  
29 no diagnosis code for immunocompromised state or relating to pregnancy, childbirth and  
30 puerperium. The final data set comprised 69 424 patients with 80 279 laparotomy episodes from 47  
31 hospitals.

### 32 **Outcomes**

33 The outcome was wound dehiscence, identified by the presence of a wound reclosure code, risk  
34 adjusted for patient characteristics and operation type.

### 35 **Results**

36 The final data set comprised 1 487 wound dehiscences. Crude PWD rates varied from 0% to 5.1%  
37 among hospitals, with an overall rate of 1.85%. Three hospitals with statistically significantly higher

1  
2  
3 38 PWD than average were identified. Hospital volume was not associated with PWD rate, except that  
4  
5 39 hospitals with very few laparotomies had lower PWD rates.  
6  
7

## 8 40 **Conclusions**

9  
10 41 Among Norwegian hospitals, there is considerable variation in PWD rate that cannot be explained by  
11  
12 42 operation type, age or comorbidity. This warrants further investigation into possible causes, such as  
13  
14 43 surgical technique, perioperative procedures or handling of complications, e.g. wound infections. The  
15  
16 44 risk adjusted PWD rate after laparotomy is a candidate quality indicator for Norwegian hospitals.  
17  
18  
19

## 20 45 **STRENGTHS AND LIMITATIONS OF THIS STUDY**

- 21  
22  
23 46 • Includes all laparotomies performed in the nation over a five-year period, with patients  
24  
25 47 followed across hospitals  
26  
27 48 • Extends previous studies to a new health system and a new coding system  
28  
29 49 • The statistical analysis uses methods for low event rates, avoiding asymptotic approximation  
30  
31 50 • Results may be subject to coding inaccuracy and incompleteness, as well as selection effects  
32  
33 51 • There were no data for surgical technique, as well as some relevant comorbidities.  
34  
35  
36  
37

## 38 52 **INTRODUCTION**

39  
40 53 The past decades have seen a major growth in initiatives for measuring, monitoring, and improving  
41  
42 54 the quality of health care services. Quality indicators are regularly published in many health care  
43  
44 55 systems. Performance of health care systems is also compared across nations, for instance in the  
45  
46 56 OECD Health Care Quality and Outcomes (HCQO) initiative, which Norway is a part of.<sup>1,2</sup> Norway has  
47  
48 57 a national quality indicator system for monitoring and comparing hospital performance, however,  
49  
50 58 not all areas of hospital performance are covered by existing national quality indicators. While there  
51  
52 59 are quality indicators for outcomes such as mortality and process measures such as waiting times,  
53  
54  
55  
56  
57  
58  
59

1  
2  
3 60 complications following hospital care is less explored, which is especially relevant following surgical  
4  
5 61 procedures.

6  
7  
8 62 Postoperative wound dehiscence (PWD) rates after open abdominal surgery (laparotomies) was  
9  
10 63 introduced as a patient safety indicator in the United States and later as a quality indicator by  
11  
12 64 OECD.<sup>3-6</sup> Norway reported the second highest numbers for 2014-2015, with a PWD rate of 1.02%. The  
13  
14 65 overall range was 0.055% to 1.05%.<sup>5</sup> Neighbouring Sweden, with comparable population health and  
15  
16 66 health care, reported 0.30%. Moreover, a recent study comparing adverse events in Norway and  
17  
18 67 Sweden found significantly higher adverse event rates of surgical complications in Norwegian  
19  
20 68 hospitals, compared to Swedish hospitals.<sup>7</sup>

21  
22  
23  
24 69 PWD is a serious complication that leads to higher mortality rates, higher implicit, explicit and social  
25  
26 70 costs as well as increased readmission rates.<sup>8,9</sup> The PWD rate has been studied elsewhere as a quality  
27  
28 71 indicator for hospitals, and found to have a high positive predictive value.<sup>10-11</sup> There are typically few  
29  
30 72 wound dehiscence events per hospital, making it more difficult to identify outlier hospitals for quality  
31  
32 73 improvement.

33  
34  
35  
36 74 Previous research has identified a number of risk factors for PWD. Examples of such factors are: (I)  
37  
38 75 patient related variables: smoking<sup>12</sup> and obesity<sup>13</sup>; (II) procedure related factors: operation type<sup>9,14</sup>,  
39  
40 76 type of incision and closure<sup>15-17</sup> and length of operation time<sup>18</sup>; (III) postoperative parameters: clean  
41  
42 77 wound classification<sup>18</sup> and coughing<sup>9</sup>; (IV) operative scenario: surgical team and nursing staff<sup>13</sup>, etc.

43  
44  
45  
46 78 The objectives of this study are to investigate the incidence of PWD after laparotomy at Norwegian  
47  
48 79 hospitals, and the potential usefulness of a PWD indicator for the Norwegian health care system,  
49  
50 80 computed from patient administrative data. More specifically we aimed at 1) investigate the  
51  
52 81 possibility to identify hospitals with higher or lower laparotomy PWD rate than average, 2) to study

1  
2  
3 82 the variability of the PWD rate among hospitals and its relation to hospital type and laparotomy  
4  
5 83 volume.  
6  
7

## 8 84 MATERIAL AND METHODS

9  
10  
11 85 Patient administrative data from all Norwegian hospitals were provided by the Norwegian Patient  
12  
13 86 Registry (NPR) for the period 2011-2015.<sup>19</sup> This comprised individual patient data from all  
14  
15 87 department stays: type of admission (acute or elective), primary and secondary diagnosis codes  
16  
17 88 according to the Norwegian version<sup>20</sup> of ICD-10, surgical and medical procedures, age, gender, date  
18  
19 89 and time of ward admission and discharge. Surgical procedures and operations are coded according  
20  
21 90 to the Norwegian version of the NOMESCO Classification of Surgical Procedures (NCSP-N).<sup>21</sup>  
22  
23 91 Procedure time and date were not available. It was therefore not possible to exclude reclosures of  
24  
25 92 wounds occurring before or on the same day as laparotomies within the same episode, as requested  
26  
27 93 in the OECD indicator specification. The NPR data files were checked for missing values and  
28  
29 94 inconsistencies between variables, such as date and time of discharge before admission, valid ICD-10  
30  
31 95 code etc.  
32  
33  
34  
35

36 96 All permanent residents in Norway have a Personal Identification Number (PIN). NPR prepared an  
37  
38 97 encrypted PIN for all patients with a valid PIN, allowing tracking of patients over time and between  
39  
40 98 hospitals. The data were linked with the National Registry to provide data of death (when  
41  
42 99 applicable), using the PIN.  
43  
44

45  
46 100 Ward admissions for each patient, at more than one hospital in case of transfers, were linked into  
47  
48 101 episodes of care when less than eight hours elapsed from time of discharge to the next ward  
49  
50 102 admission.<sup>22</sup> Wound dehiscence was defined as the occurrence of a code for a reclosure operation.  
51  
52 103 Laparotomies and wound reclosure operations were identified according to procedure codes. Each  
53  
54 104 reclosure episode was linked to the laparotomy episode immediately preceding or coinciding with it.  
55  
56 105 Reclosure episodes with no preceding laparotomy episode within 30 days, as well as laparotomy or  
57  
58

1  
2  
3 106 reclosure episodes following a reclosure episode within 30 days, were excluded. Note that the linking  
4  
5 107 of laparotomies and reclosures was not part of the original OECD specification, but is required in  
6  
7 108 order to attribute PWD to hospitals and to enable risk adjustment. Laparotomy episodes (and any  
8  
9 109 linked reclosure episode) were excluded if a diagnosis code for immunosuppression or relating to  
10  
11 110 pregnancy, childbirth and puerperium was present, if the length of stay was less than two days, or if  
12  
13 111 the patient's age was less than 15 years. Hospitals with less than 10 laparotomies over the five-year  
14  
15 112 period were excluded. The hospitals belonged to one of three types: regional, large with acute  
16  
17 113 function and small with acute function. For details of codes used, see the online supplement.  
18  
19  
20  
21 114 The Charlson comorbidities were determined from previous admissions three years prior to, but not  
22  
23 115 including the current episode of care.<sup>22-24</sup> Diagnoses were grouped according to the Clinical Condition  
24  
25 116 Summary system (CCS), adapted to the Norwegian version of ICD-10.<sup>25</sup>  
26  
27  
28

## 117 **Statistical methods**

118 Risk adjusted probabilities for a laparotomy episode resulting in a reclosure operation were  
119 estimated by bias corrected logistic regression.<sup>26</sup> The following case-mix variables were included: age  
120 (modelled by natural splines), gender, indicators for the individual Charlson comorbidities, number of  
121 previous hospital admissions two years prior to current admission, and whether the episode was  
122 acute or elective. A linear trend in admission year was also included. Based on previous studies of risk  
123 factors<sup>9,14</sup>, procedures were categorized into 13 types, according to the body system or organ  
124 involved. The effects of operation types were normalized to have zero sum. The final model was fit  
125 by stepwise regression with the BIC criterion, including two-way interactions.

126 To identify outlier hospitals, i.e. those with high or low risk adjusted PWD probabilities, estimated  
127 hospital effects were compared to a reference value, defined as the 25% trimmed mean of the  
128 hospital effects on the logistic scale.<sup>27</sup> As some hospitals reported zero reclosures, ordinary maximum  
129 likelihood estimates of the model parameters do not exist, due to separation<sup>28</sup>, and the estimated



1  
2  
3 130 variances of the fitted parameters, based on their asymptotic distribution, become unreliable. The  
4  
5 131 comparison used an exact test based on the Poisson binomial distribution for the number of PWDs  
6  
7 132 per hospital, using the estimated probabilities for each case, together with parametric bootstrapping  
8  
9 133 to account for the estimation uncertainty in the model parameters. Tests for significance were  
10  
11 134 corrected for multiple comparisons using the Guo-Romano method <sup>29</sup>, and outlier status assigned  
12  
13 135 according to the false discovery rate (FDR). An FDR not exceeding 5% was regarded as significant. For  
14  
15 136 sensitivity analysis, two alternative risk adjustment models were tested, with either a four-category  
16  
17 137 grouping of procedures or with diagnosis categories instead of the 13-category procedure grouping.  
18  
19 138 In addition, a model with the four Norwegian hospital regions was also estimated. Hospital volume,  
20  
21 139 modelled by splines, was tested for inclusion in the model.

22  
23  
24  
25 140 Finally, the hospital specific effects were modelled as a mixture of two normal distributions. The  
26  
27 141 expectation-maximization (EM) algorithm was used, taking into account the estimation variances.  
28  
29 142 The mixture model yielded estimates of the quartiles of the hospital odds ratios and the scaled  
30  
31 143 interquartile range (normalized by dividing by 1.349, to give the standard deviation in the case of a  
32  
33 144 normal distribution) was computed as a measure of spread among hospitals. Bootstrapping of the  
34  
35 145 mixture model was used to find a 95% confidence interval for the scaled interquartile range.  
36  
37  
38

## 39 146 **Patient and Public Involvement**

40  
41 147 Patients were not involved in this study. The policy of the Norwegian Institute of Public health to  
42  
43 148 publish hospital quality indicators, when they have been successfully validated.  
44  
45

## 46 47 149 **RESULTS**

48  
49  
50 150 The initial data set comprised 98 782 episodes with laparotomy and 1 909 with a reclosure operation.  
51  
52 151 After restricting data to reclosures paired with a laparotomy within 30 days, 1 487 reclosures  
53  
54 152 remained. After exclusions for pregnancy, childbirth and puerperium or immunocompromised state,  
55  
56 153 age and LOS, 80 469 laparotomies remained (no reclosures were excluded). Lastly, hospitals with less  
57  
58

154 than 10 laparotomies were excluded, yielding a final data set with 69 424 patients, 80 279  
 155 laparotomies from 47 hospitals. Descriptive statistics for the dataset are shown in Table 1.

156 *Table 1. Descriptive statistics*

|                                                | <b>PWD</b>           | <b>No PWD</b>      |
|------------------------------------------------|----------------------|--------------------|
| Age, median (quartiles)                        | 69 ( 61 - 78 )       | 65 ( 51 - 74 )     |
| Females, %                                     | 35                   | 55                 |
| Acute primary episode, %                       | 44                   | 33                 |
| PWD as primary diagnosis, reclosure episode, % | 3                    | —                  |
| Hospital type                                  |                      |                    |
| Regional                                       | 546                  | 28 274             |
| Large, with acute function                     | 819                  | 42 271             |
| Small, with acute function                     | 122                  | 8 247              |
| Diabetes with chronic complications            | 1.3                  | 1.1                |
| Hemiplegia or paraplegia                       | 1.1                  | 0.5                |
| Chronic pulmonary disease                      | 13.2                 | 6.5                |
| Renal disease                                  | 4.4                  | 3.5                |
| 30 day mortality (primary episode)             | 4.5                  | 3.3                |
| LOS days primary episode, median (quartiles)   | 18.8 ( 11.2 - 29.1 ) | 7.2 ( 4.3 - 12.3 ) |
| Percentage of reoperations in same episode     | 82                   | —                  |

157

158 From 2011 to 2015, the annual volume of laparotomies decreased somewhat, from 17 468 to 14 728,  
 159 while the proportion of acute laparotomies remained stable at around 33%.

160 The overall rate of PWD for the five-year period was 1.8%. Crude PWD rates varied from 0% to 5.1%  
 161 among hospitals. After risk adjustment, the range was 0.1% - 5.2% . Table 2 shows the odds ratios of  
 162 the final logistic regression model. The model showed good fit according to the modified Hosmer-  
 163 Lemeshow test<sup>30</sup> (p=0.8) and good predictive ability, with an area under the operating characteristic  
 164 (AUC) of 0.73.

165 *Table 2. Final model for risk adjustment*

| Variable                              | Odds ratio (95% confidence interval) |
|---------------------------------------|--------------------------------------|
| Year of admission                     | 0.93 (0.90,0.97)                     |
| Spline function 1                     | 4.07 (2.42,6.85)                     |
| Spline function 2                     | 3.63 (2.45,5.36)                     |
| Spline function 3                     | 6.17 (1.85,20.55)                    |
| Spline function 4                     | 2.61 (1.26,5.43)                     |
| Female                                | 1                                    |
| Male                                  | 2.36 (2.10,2.64)                     |
| Elective                              | 1                                    |
| Acute                                 | 1.36 (1.22,1.52)                     |
| Chronic Pulmonary disease             | 1.72 (1.48,2.01)                     |
| Operation type                        |                                      |
| Several organs                        | 2.15 (1.69,2.75)                     |
| Hernia                                | 2.80 (2.16,3.64)                     |
| Thoracoabdominal aorta                | 1.58 (0.58,4.31)                     |
| Abdominal wall                        | 0.66 (0.21,2.10)                     |
| Gastrointestinal tract                | 2.22 (1.84,2.67)                     |
| Liver                                 | 1.27 (0.81,2.00)                     |
| Biliary tract                         | 0.24 (0.12,0.48)                     |
| Pancreas                              | 0.76 (0.40,1.46)                     |
| Spleen                                | 0.99 (0.37,2.67)                     |
| Other digestive system                | 1.95 (1.50,2.53)                     |
| Kidney                                | 0.22 (0.11,0.45)                     |
| Other urinary and male genital organs | 0.42 (0.31,0.58)                     |
| Female genital organs                 | 1.39 (1.02,1.89)                     |
| Peripheral vessels                    | 1.23 (0.94,1.60)                     |
| Hospital                              |                                      |
| Scaled interquartile range            | 0.30 (0.23,0.34)                     |

166

167 In Figure 1, risk-adjusted PWD rates are shown for each hospital, plotted versus laparotomy volume

168 and hospital type.

1  
2  
3 169 After significance testing, we identified three hospitals with higher PWD and none with lower PWD  
4  
5 170 than average, when correcting for multiple testing. Without multiple test correction, one additional  
6  
7 171 hospital with high PWD was found.  
8  
9

10 172 In the alternative model including volume, the PWD increased with yearly laparotomy volume from a  
11  
12 173 very low level up to 120 laparotomies per year, after which it remained fairly constant, see Figure 1.  
13  
14 174 The effect of volume was significant ( $p < 0.001$ ). Hospital type coincided almost completely with a  
15  
16 175 grouping of hospitals by volume, and was therefore not tested separately. There was significant  
17  
18 176 variation among regions, with the Northern region having the highest and the South-Eastern region  
19  
20 177 the lowest rates (data not shown). Using diagnosis categories or aggregated operation type as risk  
21  
22 178 adjustment variables resulted in very small changes in risk adjusted PWD rates.  
23  
24  
25

## 26 179 **DISCUSSION**

27  
28  
29 180 We have studied a quality indicator for wound dehiscence after laparotomy, based on the OECD  
30  
31 181 specification, that discriminated between Norwegian hospitals. The indicator was risk adjusted for  
32  
33 182 differences in age, gender, comorbidity and type of surgery, and showed little sensitivity to changes  
34  
35 183 in the set of risk adjustment variables. The overall PWD rate was 1.8%. After risk adjustment, the  
36  
37 184 hospitals' PWD rate varied between 0.1% and 5.2%. Laparotomy volume and type of hospital had  
38  
39 185 little effect on the PWD rate, except for hospitals with very low volume. Age, male gender, chronic  
40  
41 186 pulmonary disease, and emergency laparotomy were all significant risk factors for PWD. There were  
42  
43 187 significant PWD differences according to the organ system targeted. The overall rate of PWD showed  
44  
45 188 a small but statistically significant decline over the observation period 2011-2015. The relatively large  
46  
47 189 variation of PWD rates between hospitals after correction for patient characteristics and operation  
48  
49 190 type, indicates possible variation in the quality of healthcare in different hospitals. This may be due  
50  
51 191 to variation in surgical technique and perioperative care, as well as the handling of postoperative  
52  
53 192 complications, such as wound infection, which is known to be a risk factor for PWD.<sup>14</sup> We found PWD  
54  
55  
56  
57  
58  
59

1  
2  
3 193 rates well within the range reported in international studies.<sup>9 13 14 18 31-33</sup> Also, the risk factors  
4  
5 194 identified are in accordance with previous studies, albeit limited to administrative data. Laparotomy  
6  
7 195 volume has negligible effect apart from the few hospitals with very low volume. The effect is likely a  
8  
9 196 result of differences in types of operations performed at these hospitals, compared to the other  
10  
11 197 hospitals.

12  
13  
14 198 Our study is based on complete data from all Norwegian hospitals performing laparotomies. To the  
15  
16 199 best of our knowledge, no similar study has been performed. NPR, the data source, has been  
17  
18 200 validated for several disease categories<sup>34-37</sup> and has a very high degree of completeness. It was  
19  
20 201 possible to track patients during transfers and reoperations at different hospitals.

21  
22  
23  
24 202 There is regional variation in the prevalence of smoking and obesity in Norway which could cause  
25  
26 203 some PWD variation among hospitals.<sup>38</sup> Obesity is more prevalent in Northern Norway, where PWD  
27  
28 204 rates are somewhat higher. However, in other regions where obesity is less prevalent, the rates are  
29  
30 205 similar. There is no consistent correspondence between the known variation in smoking among  
31  
32 206 counties and PWD rates. Some surgical procedures are performed only at regional hospitals, and it is  
33  
34 207 therefore possible that selection effects are present. In that case, one would expect larger changes in  
35  
36 208 PWD rates after risk adjustment for operation type, which was not found. One potential source of  
37  
38 209 error in our study is the completeness and correctness of coding in the NPR, particularly the coding  
39  
40 210 of reclosure operations. The risk adjustment depends on data from previous hospitalization and may  
41  
42 211 not capture all comorbidities. Moreover, selection effects cannot not be ruled out. Differing policies  
43  
44 212 for operations on patients with known risk factors, e.g. obesity or smoking, would likely cause  
45  
46 213 variation in PWD rates. No attempt was made to identify main operation or operation intent, as this  
47  
48 214 would require a classification effort outside the scope of the present study. There could be a residual  
49  
50 215 imbalance in case mix, affecting PWD through e.g. operation duration, which is a known risk factor.  
51  
52 216 The observed effect of laparotomy volume is likely a result of differences in types of operations  
53  
54 217 performed at the hospitals with very low volume, compared to the other hospitals.

1  
2  
3 218 Previous studies have shown that the quality indicator has high positive predictive value, but only  
4  
5 219 moderate sensitivity.<sup>10</sup> Since we have used specific wound reclosure codes, similar to those used in  
6  
7 220 previous studies, we expect a high positive predictive value in Norway as well. Conceivably, the  
8  
9 221 sensitivity depends on the coding system, in particular the various alternative codes related to  
10  
11 222 complications. Sensitivity in Norway may thus differ from that of other healthcare systems.

## 14 223 **Conclusions**

16 224 Among Norwegian hospitals, there is a significant variation in PWD rate that cannot be explained by  
17  
18 225 operation type, age or comorbidity. This warrants further investigation into possible causes, such as  
19  
20 226 surgical technique, perioperative procedures or handling of complications, e.g. wound infections. The  
21  
22 227 risk adjusted PWD rate after laparotomy is a candidate for use as a quality indicator for Norwegian  
23  
24 228 hospitals, and will make it possible to identify hospitals with apparent quality problems. To achieve  
25  
26 229 sufficient discrimination, however, five-year data are desirable, making it more difficult to monitor  
27  
28 230 changes in hospital performance resulting from quality improvement efforts. It lies outside the scope  
29  
30 231 of the present study to perform a comprehensive validation of the PWD rate as a quality indicator  
31  
32 232 suitable for public reporting. There are uncertainties and potential biases in the indicator, implying  
33  
34 233 that it must be regarded as a signal for follow-up within hospitals, rather than giving a final verdict of  
35  
36 234 inferior or superior quality. For reporting on surgical quality, several indicators should be used to give  
37  
38 235 a balanced view of the different aspects of quality and patient safety.

## 42 236 **FOOTNOTES**

### 46 237 **Funding**

48 238 This research received no specific grant from any funding agency in the public, commercial or not-  
49  
50 239 for-profit sectors.

## 240 **Competing interests**

241 The authors have no competing interests.

## 242 **Authors' contributions**

243 AKL and OT conceived the study. DTK, TMH, OT, and SH participated in data preparation. OT, SH and  
244 AKL contributed to the analysis. OT helped draft the manuscript. JH was responsible for the statistical  
245 analysis and final manuscript. All authors revised and approved the final manuscript.

## 246 **Ethics approval**

247 The study was approved by the Norwegian Directorate of Health and the Norwegian Data Protection  
248 Authority.

## 249 **Data sharing**

250 The data set contains indirectly identifiable personal data, and cannot be shared without express  
251 permission from the Norwegian Patient Registry. For further information, contact the corresponding  
252 author.

253 *Figure 1. Risk adjusted PWD rates versus yearly laparotomy volume, by hospital type. Trend*  
254 *curve is obtained by smoothing the scatterplot*

## 255 **REFERENCES**

- 256 1. Carinci F, Van Gool K, Mainz J, et al. Towards actionable international comparisons of health  
257 system performance: expert revision of the OECD framework and quality indicators. *Int J*  
258 *Qual Health Care* 2015;27(2):137-46. doi: 10.1093/intqhc/mzv004 [published Online First:  
259 2015/03/12]
- 260 2. OECD. Health Care Quality and Outcomes: OECD; 2018 [Available from:  
261 <http://www.oecd.org/health/health-systems/health-care-quality-and-outcomes.htm>  
262 accessed 2018-06-06 2018.
- 263 3. Hannan EL. Using mortality data for profiling hospital quality of care and targeting substandard  
264 care. *J Soc Health Syst* 1989;1(1):31-48.
- 265 4. Miller MR, Elixhauser A, Zhan C, et al. Patient Safety Indicators: using administrative data to  
266 identify potential patient safety concerns. *Health Serv Res* 2001;36(6 Pt 2):110-32.
- 267 5. OECD. Health Care Quality Indicators - Patient Safety 2018 [Available from:  
268 <http://www.oecd.org/health/health-systems/hcqi-patient-safety.htm> accessed 2018-06-06  
269 2018.

- 270 6. OECD. Definitions for Health Care Quality Indicators 2016-2017 HCQI Data Collection: OECD,  
271 2016:113.
- 272 7. Deilkas ET, Risberg MB, Haugen M, et al. Exploring similarities and differences in hospital adverse  
273 event rates between Norway and Sweden using Global Trigger Tool. *BMJ open*  
274 2017;7(3):e012492. doi: 10.1136/bmjopen-2016-012492
- 275 8. Hannan EL, Bernard HR, O'Donnell JF, et al. A methodology for targeting hospital cases for quality  
276 of care record reviews. *Am J Public Health* 1989;79(4):430-6.
- 277 9. van Ramshorst GH, Nieuwenhuizen J, Hop WC, et al. Abdominal wound dehiscence in adults:  
278 development and validation of a risk model. *World J Surg* 2010;34(1):20-7. doi:  
279 <https://dx.doi.org/10.1007/s00268-009-0277-y>
- 280 10. Romano PS, Mull HJ, Rivard PE, et al. Validity of selected AHRQ patient safety indicators based on  
281 VA National Surgical Quality Improvement Program data. *Health Serv Res* 2009;44(1):182-  
282 204. doi: <https://dx.doi.org/10.1111/j.1475-6773.2008.00905.x>
- 283 11. Rosen AK, Itani KM, Cevasco M, et al. Validating the patient safety indicators in the Veterans  
284 Health Administration: do they accurately identify true safety events? *Med Care*  
285 2012;50(1):74-85. doi: <https://dx.doi.org/10.1097/MLR.0b013e3182293edf>
- 286 12. Kean J. The effects of smoking on the wound healing process. *J Wound Care* 2010;19(1):5-8. doi:  
287 10.12968/jowc.2010.19.1.46092
- 288 13. Shanmugam VK, Fernandez SJ, Evans KK, et al. Postoperative wound dehiscence: Predictors and  
289 associations. *Wound Repair Regen* 2015;23(2):184-90. doi:  
290 <https://dx.doi.org/10.1111/wrr.12268>
- 291 14. Sorensen LT, Hemmingsen U, Kallehave F, et al. Risk factors for tissue and wound complications in  
292 gastrointestinal surgery. *Ann Surg* 2005;241(4):654-8.
- 293 15. Mahey RG, Smruti; Rajpurohit, Jitesh; Desai, Desai; Suryawanshi, Sachin;. A prospective study of  
294 risk factors for abdominal wound dehiscence. *International Surgery Journal* 2017;4(1):24-28.  
295 doi: <http://dx.doi.org/10.18203/2349-2902.isj20163983>
- 296 16. Deerenberg EB, Harlaar JJ, Steyerberg EW, et al. Small bites versus large bites for closure of  
297 abdominal midline incisions (STITCH): a double-blind, multicentre, randomised controlled  
298 trial. *Lancet* 2015;386(10000):1254-60. doi: 10.1016/s0140-6736(15)60459-7 [published  
299 Online First: 2015/07/21]
- 300 17. Israelsson LA, Millbourn D. Prevention of Incisional Hernias: How to Close a Midline Incision. *Surg*  
301 *Clin North Am* 2013;93(5):1027-40. doi: <https://doi.org/10.1016/j.suc.2013.06.009>
- 302 18. Webster C, Neumayer L, Smout R, et al. Prognostic models of abdominal wound dehiscence after  
303 laparotomy. *J Surg Res* 2003;109(2):130-7.
- 304 19. Health NDo. Norsk pasientregister - innhold og kvalitet: Norwegian Directorate of Health; 2018  
305 [Available from: <https://helsedirektoratet.no/norsk-pasientregister-npr/innhold-og-kvalitet>  
306 accessed 2018-06-06 2018.
- 307 20. eHealth NDo. Helsefaglige kodeverk: Norwegian Directorate of eHealth 2018 [Available from:  
308 <https://ehelse.no/standarder-kodeverk-og-referansekatalog/helsefaglige-kodeverk> accessed  
309 2018-06-06 2018.
- 310 21. Norwegian Directorate of eHealth. NCMP, NCSP og NCRP: Klassifikasjon av medisinske, kirurgiske  
311 og radiologiske prosedyrer Norwegian Directorate of eHealth; 2018 [Available from:  
312 <https://finnkode.ehelse.no/#ncmpncsp/0/0/0/-1> accessed 15th May 2018.
- 313 22. Hassani S, Lindman AS, Kristoffersen DT, et al. 30-Day Survival Probabilities as a Quality Indicator  
314 for Norwegian Hospitals: Data Management and Analysis. *PLoS One* 2015;10(9):e0136547.  
315 doi: 10.1371/journal.pone.0136547
- 316 23. Quan HD, Sundararajan V, Halfon P, et al. Coding algorithms for defining comorbidities in ICD-9-  
317 CM and ICD-10 administrative data. *Med Care* 2005;43(11):1130-39. doi: DOI  
318 10.1097/01.mlr.0000182534.19832.83
- 319 24. Quan H, Li B, Couris CM, et al. Updating and validating the Charlson comorbidity index and score  
320 for risk adjustment in hospital discharge abstracts using data from 6 countries. *Am J*  
321 *Epidemiol* 2011;173(6):676-82. doi: 10.1093/aje/kwq433



- 1  
2  
3 322 25. (HCUP) HCUP. Beta Clinical Classifications Software (CCS) for ICD-10-CM/PCS: Agency for  
4 323 Healthcare Research and Quality; 2018 [Available from: <https://www.hcup->  
5 324 [us.ahrq.gov/toolssoftware/ccs10/ccs10.jsp](https://www.hcup-us.ahrq.gov/toolssoftware/ccs10/ccs10.jsp) accessed 2018-06-06 2018.
- 6 325 26. Firth D. Bias Reduction of Maximum-Likelihood-Estimates. *Biometrika* 1993;80(1):27-38. doi: DOI  
7 326 10.1093/biomet/80.1.27
- 8 327 27. Kristoffersen DT, Helgeland J, Clench-Aas J, et al. Observed to expected or logistic regression to  
9 328 identify hospitals with high or low 30-day mortality? *PLoS One* 2018;13(4) doi: ARTN  
10 329 e0195248 10.1371/journal.pone.0195248
- 11 330 28. Albert A, Anderson JA. On the Existence of Maximum Likelihood Estimates in Logistic Regression  
12 331 Models. *Biometrika* 1984;71(1):1-10. doi: 10.2307/2336390
- 13 332 29. Guo W, Romano JP. On stepwise control of directional errors under independence and some  
14 333 dependence. *Journal of Statistical Planning and Inference* 2015;163:21-33. doi:  
15 334 <https://doi.org/10.1016/j.jspi.2015.02.009>
- 16 335 30. Paul P, Pennell ML, Lemeshow S. Standardizing the power of the Hosmer-Lemeshow goodness of  
17 336 fit test in large data sets. *Stat Med* 2013;32(1):67-80. doi: 10.1002/sim.5525
- 18 337 31. Sandy-Hodgetts K, Carville K, Leslie GD. Determining risk factors for surgical wound dehiscence: a  
19 338 literature review. *Int Wound J* 2015;12(3):265-75. doi: 10.1111/iwj.12088
- 20 339 32. Kenig J, Richter P, Lasek A, et al. The efficacy of risk scores for predicting abdominal wound  
21 340 dehiscence: a case-controlled validation study. *BMC Surg* 2014;14:65. doi: 10.1186/1471-  
22 341 2482-14-65
- 23 342 33. Walming S, Angenete E, Block M, et al. Retrospective review of risk factors for surgical wound  
24 343 dehiscence and incisional hernia. *BMC Surg* 2017;17(1):19. doi: 10.1186/s12893-017-0207-0
- 25 344 34. Bakken IJ, Gystad SO, Christensen OO, et al. Comparison of data from the Norwegian Patient  
26 345 Register and the Cancer Registry of Norway. *Tidsskr Nor Laegeforen* 2012;132(11):1336-40.  
27 346 doi: 10.4045/tidsskr.11.1099 [published Online First: 2012/06/22]
- 28 347 35. Hoiberg MP, Gram J, Hermann P, et al. The incidence of hip fractures in Norway -accuracy of the  
29 348 national Norwegian patient registry. *BMC Musculoskelet Disord* 2014;15:372. doi:  
30 349 10.1186/1471-2474-15-372 [published Online First: 2014/11/15]
- 31 350 36. Oie LR, Madsbu MA, Giannadakis C, et al. Validation of intracranial hemorrhage in the Norwegian  
32 351 Patient Registry. *Brain and behavior* 2018;8(2):e00900. doi: 10.1002/brb3.900 [published  
33 352 Online First: 2018/02/28]
- 34 353 37. Varndal T, Bakken IJ, Janszky I, et al. Comparison of the validity of stroke diagnoses in a medical  
35 354 quality register and an administrative health register. *Scandinavian journal of public health*  
36 355 2016;44(2):143-9. doi: 10.1177/1403494815621641 [published Online First: 2015/12/15]
- 37 356 38. Health NLoP. Public Health report: Norwegian Institute of Public Health; 2018 [Available from:  
38 357 <https://www.fhi.no/en/op/hin/> accessed 2018-06-06 2018.

358

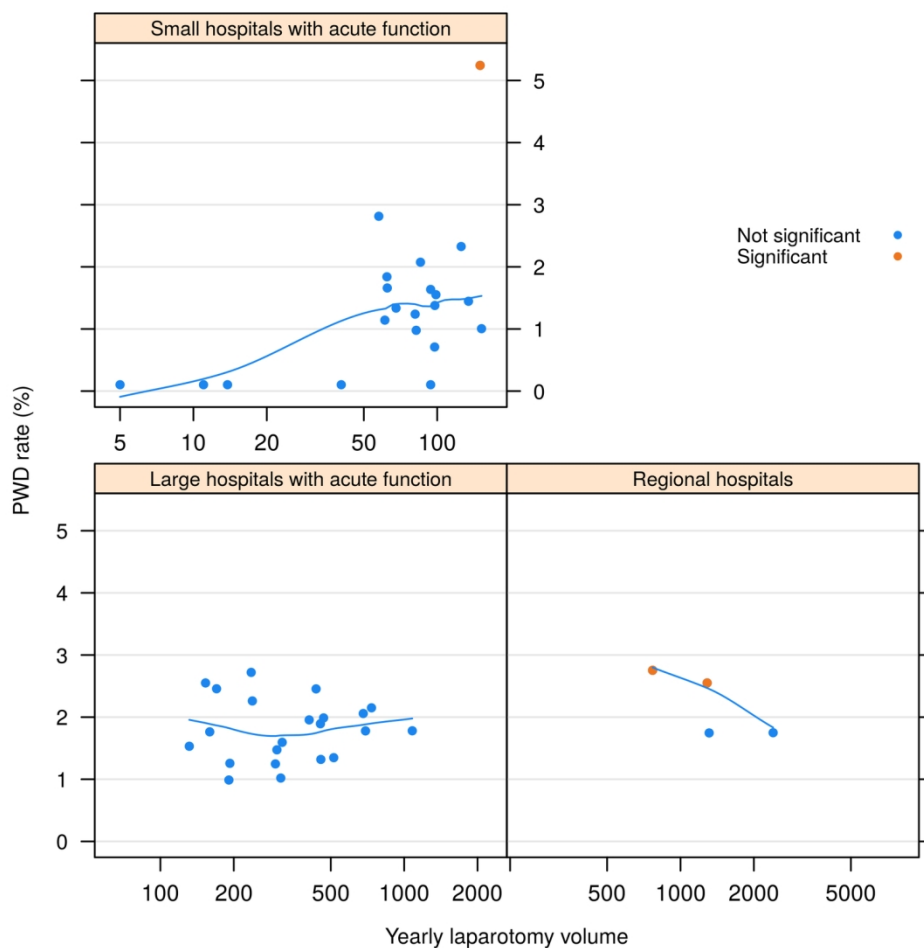

Figure 1. Risk adjusted PWD rates versus yearly laparotomy volume, by hospital type. Trend curve is obtained by smoothing the scatterplot

149x149mm (300 x 300 DPI)

## Online supplement

Table 1. ICD-10 diagnosis codes contained in MDC 14 (Pregnancy, childbirth, and puerperium)

| Code  | Title                                                                                            |
|-------|--------------------------------------------------------------------------------------------------|
| A34   | Obstetrical tetanus                                                                              |
| F53.0 | Mild mental and behavioural disorders associated with the puerperium, not elsewhere classified   |
| F53.1 | Severe mental and behavioural disorders associated with the puerperium, not elsewhere classified |
| F53.8 | Other mental and behavioural disorders associated with the puerperium, not elsewhere classified  |
| F53.9 | Puerperal mental disorder, unspecified                                                           |
| Oxx.x | Pregnancy, childbirth and puerperium                                                             |
| Z32.0 | Pregnancy, not (yet) confirmed                                                                   |
| Z32.1 | Pregnancy confirmed                                                                              |
| Z33   | Pregnant state, incidental                                                                       |
| Z34.0 | Supervision of normal first pregnancy                                                            |
| Z34.8 | Supervision of other normal pregnancy                                                            |
| Z34.9 | Supervision of normal pregnancy, unspecified                                                     |
| Z35.0 | Supervision of pregnancy with history of infertility                                             |
| Z35.1 | Supervision of pregnancy with history of abortive outcome                                        |
| Z35.2 | Supervision of pregnancy with other poor reproductive or obstetric history                       |
| Z35.3 | Supervision of pregnancy with history of insufficient antenatal care                             |
| Z35.4 | Supervision of pregnancy with grand multiparity                                                  |
| Z35.5 | Supervision of elderly primigravida                                                              |
| Z35.6 | Supervision of very young primigravida                                                           |
| Z35.8 | Supervision of other high-risk pregnancies                                                       |
| Z35.9 | Supervision of high-risk pregnancy, unspecified                                                  |
| Z36.0 | Antenatal screening for chromosomal anomalies                                                    |
| Z36.1 | Antenatal screening for raised alphetoprotein level                                              |
| Z36.2 | Other antenatal screening based on amniocentesis                                                 |
| Z36.3 | Antenatal screening for malformations using ultrasound and other physical methods                |
| Z36.4 | Antenatal screening for fetal growth retardation using ultrasound and other physical methods     |
| Z36.5 | Antenatal screening for isoimmunization                                                          |
| Z36.8 | Other antenatal screening                                                                        |
| Z36.9 | Antenatal screening, unspecified                                                                 |
| Z37.0 | Single live birth                                                                                |
| Z37.1 | Single stillbirth                                                                                |
| Z37.2 | Twins, both liveborn                                                                             |
| Z37.3 | Twins, one liveborn and one stillborn                                                            |
| Z37.4 | Twins, both stillborn                                                                            |
| Z37.5 | Other multiple births, all liveborn                                                              |
| Z37.6 | Other multiple births, some liveborn                                                             |
| Z37.7 | Other multiple births, all stillborn                                                             |
| Z37.9 | Outcome of delivery, unspecified                                                                 |
| Z39.0 | Care and examination immediately after delivery                                                  |
| Z39.1 | Care and examination of lactating mother                                                         |
| Z39.2 | Routine postpartum follow-up                                                                     |
| Z64.0 | Problems related to unwanted pregnancy                                                           |

Table 2. ICD-10 diagnosis codes for immunocompromised state

| Code  | Title                                                                                             |
|-------|---------------------------------------------------------------------------------------------------|
| B20.0 | HIV disease resulting in mycobacterial infection                                                  |
| B20.1 | HIV disease resulting in other bacterial infections                                               |
| B20.2 | HIV disease resulting in cytomegaloviral disease                                                  |
| B20.3 | HIV disease resulting in other viral infections                                                   |
| B20.4 | HIV disease resulting in candidiasis                                                              |
| B20.5 | HIV disease resulting in other mycoses                                                            |
| B20.6 | HIV disease resulting in Pneumocystis carinii pneumonia                                           |
| B20.7 | HIV disease resulting in multiple infections                                                      |
| B20.8 | HIV disease resulting in other infectious and parasitic diseases                                  |
| B20.9 | HIV disease resulting in unspecified infectious or parasitic disease                              |
| B21.0 | HIV disease resulting in Kaposi's sarcoma                                                         |
| B21.1 | HIV disease resulting in Burkitt's lymphoma                                                       |
| B21.2 | HIV disease resulting in other types of non-Hodgkin's lymphoma                                    |
| B21.3 | HIV disease resulting in other malignant neoplasms of lymphoid, haematopoietic and related tissue |
| B21.7 | HIV disease resulting in multiple malignant neoplasms                                             |
| B21.8 | HIV disease resulting in other malignant neoplasms                                                |
| B21.9 | HIV disease resulting in unspecified malignant neoplasm                                           |
| B22.0 | HIV disease resulting in encephalopathy                                                           |
| B22.1 | HIV disease resulting in lymphoid interstitial pneumonitis                                        |
| B22.2 | HIV disease resulting in wasting syndrome                                                         |
| B22.7 | HIV disease resulting in multiple diseases classified elsewhere                                   |
| B23.1 | HIV disease resulting in (persistent) generalized lymphadenopathy                                 |
| B23.2 | HIV disease resulting in haematological and immunological abnormalities, not elsewhere classified |
| B23.8 | HIV disease resulting in other specified conditions                                               |
| B24   | Unspecified human immunodeficiency virus [HIV] disease                                            |
| B59   | Pneumocystosis                                                                                    |
| D47.1 | Chronic myeloproliferative disease                                                                |
| D70   | Agranulocytosis                                                                                   |
| D71   | Functional disorders of polymorphonuclear neutrophils                                             |
| D72.0 | Genetic anomalies of leukocytes                                                                   |
| D80.0 | Hereditary hypogammaglobulinaemia                                                                 |
| D80.1 | Nonfamilial hypogammaglobulinaemia                                                                |
| D80.2 | Selective deficiency of immunoglobulin A [IgA]                                                    |
| D80.3 | Selective deficiency of immunoglobulin G [IgG] subclasses                                         |
| D80.4 | Selective deficiency of immunoglobulin M [IgM]                                                    |
| D80.5 | Immunodeficiency with increased immunoglobulin M [IgM]                                            |
| D80.6 | Antibody deficiency with near-normal immunoglobulins or with hyperimmunoglobulinaemia             |
| D80.7 | Transient hypogammaglobulinaemia of infancy                                                       |
| D80.8 | Other immunodeficiencies with predominantly antibody defects                                      |
| D80.9 | Immunodeficiency with predominantly antibody defects, unspecified                                 |
| D81.0 | Severe combined immunodeficiency [SCID] with reticular dysgenesis                                 |
| D81.1 | Severe combined immunodeficiency [SCID] with low T- and B-cell numbers                            |
| D81.2 | Severe combined immunodeficiency [SCID] with low or normal B-cell numbers                         |
| D81.3 | Adenosine deaminase [ADA] deficiency                                                              |
| D81.4 | Nezelof's syndrome                                                                                |
| D81.5 | Purine nucleoside phosphorylase [PNP] deficiency                                                  |
| D81.6 | Major histocompatibility complex class I deficiency                                               |
| D81.7 | Major histocompatibility complex class II deficiency                                              |
| D81.8 | Other combined immunodeficiencies                                                                 |
| D81.9 | Combined immunodeficiency, unspecified                                                            |
| D82.0 | Wiskott-Aldrich syndrome                                                                          |

|       |                                                                                                |
|-------|------------------------------------------------------------------------------------------------|
| 1     |                                                                                                |
| 2     |                                                                                                |
| 3     |                                                                                                |
| 4     |                                                                                                |
| 5     |                                                                                                |
| 6     |                                                                                                |
| 7     |                                                                                                |
| 8     |                                                                                                |
| 9     |                                                                                                |
| 10    |                                                                                                |
| 11    |                                                                                                |
| 12    |                                                                                                |
| 13    |                                                                                                |
| 14    |                                                                                                |
| 15    |                                                                                                |
| 16    |                                                                                                |
| 17    |                                                                                                |
| 18    |                                                                                                |
| 19    |                                                                                                |
| 20    |                                                                                                |
| 21    |                                                                                                |
| 22    |                                                                                                |
| 23    |                                                                                                |
| 24    |                                                                                                |
| 25    |                                                                                                |
| 26    |                                                                                                |
| 27    |                                                                                                |
| 28    |                                                                                                |
| 29    |                                                                                                |
| 30    |                                                                                                |
| 31    |                                                                                                |
| 32    |                                                                                                |
| 33    |                                                                                                |
| 34    |                                                                                                |
| 35    |                                                                                                |
| 36    |                                                                                                |
| 37    |                                                                                                |
| 38    |                                                                                                |
| 39    |                                                                                                |
| 40    |                                                                                                |
| 41    |                                                                                                |
| 42    |                                                                                                |
| 43    |                                                                                                |
| 44    |                                                                                                |
| 45    |                                                                                                |
| 46    |                                                                                                |
| 47    |                                                                                                |
| 48    |                                                                                                |
| 49    |                                                                                                |
| 50    |                                                                                                |
| 51    |                                                                                                |
| 52    |                                                                                                |
| 53    |                                                                                                |
| 54    |                                                                                                |
| 55    |                                                                                                |
| 56    |                                                                                                |
| 57    |                                                                                                |
| 58    |                                                                                                |
| 59    |                                                                                                |
| 60    |                                                                                                |
| D82.1 | Di George's syndrome                                                                           |
| D82.2 | Immunodeficiency with short-limbed stature                                                     |
| D82.3 | Immunodeficiency following hereditary defective response to Epstein-Barr virus                 |
| D82.4 | Hyperimmunoglobulin E [IgE] syndrome                                                           |
| D82.8 | Immunodeficiency associated with other specified major defects                                 |
| D82.9 | Immunodeficiency associated with major defect, unspecified                                     |
| D83.0 | Common variable immunodeficiency with predominant abnormalities of B-cell numbers and function |
| D83.1 | Common variable immunodeficiency with predominant immunoregulatory T-cell disorders            |
| D83.2 | Common variable immunodeficiency with autoantibodies to B- or T-cells                          |
| D83.8 | Other common variable immunodeficiencies                                                       |
| D83.9 | Common variable immunodeficiency, unspecified                                                  |
| D84.0 | Lymphocyte function antigen-1 [LFA-1] defect                                                   |
| D84.1 | Defects in the complement system                                                               |
| D84.8 | Other specified immunodeficiencies                                                             |
| D84.9 | Immunodeficiency, unspecified                                                                  |
| D89.8 | Other specified disorders involving the immune mechanism, not elsewhere classified             |
| D89.9 | Disorder involving the immune mechanism, unspecified                                           |
| E40   | Kwashiorkor                                                                                    |
| E41   | Nutritional marasmus                                                                           |
| E42   | Marasmic kwashiorkor                                                                           |
| E43   | Unspecified severe protein-energy malnutrition                                                 |
| I12.0 | Hypertensive renal disease with renal failure                                                  |
| I13.1 | Hypertensive heart and renal disease with renal failure                                        |
| I13.2 | Hypertensive heart and renal disease with both (congestive) heart failure and renal failure    |
| K91.2 | Postsurgical malabsorption, not elsewhere classified                                           |
| N18.0 | End-stage renal disease                                                                        |
| N18.5 | Chronic kidney disease, stage 5                                                                |
| N18.8 | Other chronic renal failure                                                                    |
| T86.0 | Bone-marrow transplant rejection                                                               |
| T86.1 | Kidney transplant failure and rejection                                                        |
| T86.2 | Heart transplant failure and rejection                                                         |
| T86.3 | Heart-lung transplant failure and rejection                                                    |
| T86.4 | Liver transplant failure and rejection                                                         |
| T86.8 | Failure and rejection of other transplanted organs and tissues                                 |
| T86.9 | Failure and rejection of unspecified transplanted organ and tissue                             |
| Y83.0 | Surgical Operation with transplant of whole organ or tissue                                    |
| Z49.0 | Preparatory care for dialysis                                                                  |
| Z49.1 | Extracorporeal dialysis                                                                        |
| Z49.2 | Other dialysis                                                                                 |
| Z94.0 | Kidney transplant status                                                                       |
| Z94.1 | Heart transplant status                                                                        |
| Z94.2 | Lung transplant status                                                                         |
| Z94.3 | Heart and lungs transplant status                                                              |
| Z94.4 | Liver transplant status                                                                        |
| Z94.8 | Other transplanted organ and tissue status                                                     |
| Z94.9 | Transplanted organ and tissue status, unspecified                                              |

*Procedure codes for laparotomy and operation types.* Laparotomy codes are the total of codes in tables 3-16. Note that a last code digit of 0,3 or 6 signifies an open or other non-endoscopic operation or procedure.

*Table 3. NCSP-N codes for reclosure procedures*

| Code  | Title                                                                            |
|-------|----------------------------------------------------------------------------------|
| JWA00 | Repair of wound dehiscence in gastroenterological surgery                        |
| KWA00 | Repair of wound dehiscence in urological surgery                                 |
| LWA00 | Repair of wound dehiscence in gynaecological surgery                             |
| PWA00 | Repair of wound dehiscence in surgery of peripheral vessels and lymphatic system |

*Table 4. NCSP-N codes for repair of thoracoabdominal aorta*

| Code  | Title                                                                   |
|-------|-------------------------------------------------------------------------|
| FCD00 | Suture of thoracoabdominal aorta                                        |
| FCD10 | Reinforcement of thoracoabdominal aorta using suture                    |
| FCD30 | Repair of thoracoabdominal aorta using patch                            |
| FCD40 | Partial resection and suture of thoracoabdominal aorta                  |
| FCD50 | Resection and reconstruction of thoracoabdominal aorta using tube graft |
| FCD60 | Resection of thoracoabdominal aorta and reimplantation of branches      |
| FCD70 | Bypass of thoracoabdominal aorta using tube graft                       |
| FCD80 | Removal of foreign body from thoracoabdominal aorta                     |
| FCD96 | Other repair of thoracoabdominal aorta                                  |

*Table 5. NCSP-N code for procedures on the abdominal wall*

| Code  | Title                      |
|-------|----------------------------|
| JAA00 | Incision of abdominal wall |

*Table 6. NCSP-N codes for hernia repair*

| Code  | Title                                     |
|-------|-------------------------------------------|
| JBB00 | Repair of paraoesophageal hernia          |
| JBB10 | Repair of congenital diaphragmatic hernia |
| JBB96 | Repair of other diaphragmatic hernia      |
| JBC00 | Gastro-oesophageal antireflux operation   |

*Table 7. NCSP-N codes for procedures on the digestive tract: oesophagus, stomach and intestines*

| Code  | Title                           |
|-------|---------------------------------|
| JCA00 | Oesophagotomy                   |
| JCA20 | Ligature of oesophageal varices |

|    |                                                                                           |
|----|-------------------------------------------------------------------------------------------|
| 1  |                                                                                           |
| 2  |                                                                                           |
| 3  | JCA60 Transcervical excision of diverticulum of oesophagus                                |
| 4  | JCA96 Other local operation on oesophagus                                                 |
| 5  | JCB00 Oesophagostomy                                                                      |
| 6  | JCC00 Transhiatal partial oesophagectomy without interposition                            |
| 7  | JCC10 Transthoracic partial oesophagectomy without interposition                          |
| 8  | JCC20 Transhiatal partial oesophagectomy with interposition of intestine                  |
| 9  | JCC30 Transthoracic partial oesophagectomy with interposition of intestine                |
| 10 | JCC96 Other partial oesophagectomy                                                        |
| 11 | JCD00 Subcutaneous anastomosis of oesophagus without interposition                        |
| 12 | JCD03 Subcutaneous anastomosis of oesophagus with interposition of intestine              |
| 13 | JCD10 Intrathoracic anastomosis of oesophagus without interposition                       |
| 14 | JCD13 Intrathoracic oesophageal anastomosis with interposition of intestine               |
| 15 | JCD20 Transection of oesophagus                                                           |
| 16 | JCD96 Other anastomosis of oesophagus without resection                                   |
| 17 | JCE00 Suture of oesophagus                                                                |
| 18 | JCE10 Plastic repair of stenosis of cardia                                                |
| 19 | JCE20 Cardiomyotomy                                                                       |
| 20 | JCE30 Repair of oesophageal atresia or congenital tracheo-oesophageal fistula             |
| 21 | JCE33 Closure of acquired tracheo-oesophageal or broncho-oesophageal fistula              |
| 22 | JCE40 Reconstruction of oesophagus using flap                                             |
| 23 | JCE50 Reconstruction of oesophagus using free microvascular graft of intestine            |
| 24 | JCE96 Other reconstruction of oesophagus                                                  |
| 25 | JCF00 Insertion of oesophageal stent                                                      |
| 26 | JCW96 Other operation on oesophagus                                                       |
| 27 | JDA00 Gastrotomy                                                                          |
| 28 | JDA60 Closure of perforated ulcer of stomach                                              |
| 29 | JDA63 Local excision of lesion of stomach                                                 |
| 30 | JDC00 Partial gastrectomy and gastroduodenostomy                                          |
| 31 | JDC10 Partial gastrectomy and gastrojejunostomy                                           |
| 32 | JDC20 Partial gastrectomy and Roux-en-Y reconstruction                                    |
| 33 | JDC30 Partial gastrectomy with interposition of jejunum                                   |
| 34 | JDC40 Partial gastrectomy and oesophagogastrostomy                                        |
| 35 | JDC96 Partial gastrectomy with other reconstruction                                       |
| 36 | JDD00 Total gastrectomy and Roux-en-Y oesophagojejunostomy                                |
| 37 | JDD96 Total gastrectomy with other reconstruction                                         |
| 38 | JDE00 Gastrojejunostomy                                                                   |
| 39 | JDE10 Conversion of gastrojejunostomy to Roux-en-Y anastomosis                            |
| 40 | JDE20 Conversion of gastrojejunostomy to gastroduodenostomy with interposition of jejunum |
| 41 | JDE96 Other anastomosis of stomach without concurrent gastrectomy                         |
| 42 | JDF00 Gastroplasty                                                                        |
| 43 | JDF10 Gastric bypass                                                                      |
| 44 | JDF20 Gastric banding                                                                     |
| 45 | JDF96 Other bariatric operation on stomach                                                |
| 46 | JDG00 Truncal vagotomy                                                                    |
| 47 | JDG10 Proximal gastric vagotomy                                                           |
| 48 | JDG96 Other vagotomy                                                                      |
| 49 |                                                                                           |
| 50 |                                                                                           |
| 51 |                                                                                           |
| 52 |                                                                                           |
| 53 |                                                                                           |
| 54 |                                                                                           |
| 55 |                                                                                           |
| 56 |                                                                                           |
| 57 |                                                                                           |
| 58 |                                                                                           |
| 59 |                                                                                           |
| 60 |                                                                                           |

|    |                                                                                    |
|----|------------------------------------------------------------------------------------|
| 1  |                                                                                    |
| 2  |                                                                                    |
| 3  |                                                                                    |
| 4  |                                                                                    |
| 5  |                                                                                    |
| 6  |                                                                                    |
| 7  |                                                                                    |
| 8  |                                                                                    |
| 9  |                                                                                    |
| 10 |                                                                                    |
| 11 |                                                                                    |
| 12 |                                                                                    |
| 13 |                                                                                    |
| 14 |                                                                                    |
| 15 |                                                                                    |
| 16 |                                                                                    |
| 17 |                                                                                    |
| 18 |                                                                                    |
| 19 |                                                                                    |
| 20 |                                                                                    |
| 21 |                                                                                    |
| 22 |                                                                                    |
| 23 |                                                                                    |
| 24 |                                                                                    |
| 25 |                                                                                    |
| 26 |                                                                                    |
| 27 |                                                                                    |
| 28 |                                                                                    |
| 29 |                                                                                    |
| 30 |                                                                                    |
| 31 |                                                                                    |
| 32 |                                                                                    |
| 33 |                                                                                    |
| 34 |                                                                                    |
| 35 |                                                                                    |
| 36 |                                                                                    |
| 37 |                                                                                    |
| 38 |                                                                                    |
| 39 |                                                                                    |
| 40 |                                                                                    |
| 41 |                                                                                    |
| 42 |                                                                                    |
| 43 |                                                                                    |
| 44 |                                                                                    |
| 45 |                                                                                    |
| 46 |                                                                                    |
| 47 |                                                                                    |
| 48 |                                                                                    |
| 49 |                                                                                    |
| 50 |                                                                                    |
| 51 |                                                                                    |
| 52 |                                                                                    |
| 53 |                                                                                    |
| 54 |                                                                                    |
| 55 |                                                                                    |
| 56 |                                                                                    |
| 57 |                                                                                    |
| 58 |                                                                                    |
| 59 |                                                                                    |
| 60 |                                                                                    |
|    | JDH00 Duodenotomy                                                                  |
|    | JDH40 Duodenostomy on duodenal bulb                                                |
|    | JDH50 Local excision of lesion of duodenal bulb                                    |
|    | JDH60 Pyloromyotomy                                                                |
|    | JDH63 Pyloroplasty                                                                 |
|    | JDH70 Closure of perforated ulcer of duodenum                                      |
|    | JDW96 Other operation on stomach or duodenum                                       |
|    | JEA00 Appendectomy                                                                 |
|    | JEA10 Appendectomy with drainage                                                   |
|    | JEW96 Other operation on appendix                                                  |
|    | JFA00 Enterotomy                                                                   |
|    | JFA10 Colotomy                                                                     |
|    | JFA16 Biopsy of wall of colon without colotomy                                     |
|    | JFA60 Strictureplasty in small intestine                                           |
|    | JFA63 Strictureplasty in colon                                                     |
|    | JFA70 Suture of small intestine                                                    |
|    | JFA73 Excision of lesion of small intestine                                        |
|    | JFA76 Closure of fistula of small intestine                                        |
|    | JFA80 Suture of colon                                                              |
|    | JFA83 Excision of lesion of colon                                                  |
|    | JFA86 Closure of fistula of colon                                                  |
|    | JFA96 Other local operation on intestine                                           |
|    | JFB00 Partial resection of small intestine                                         |
|    | JFB10 Reversal of segment of small intestine                                       |
|    | JFB13 Plastic repair of small intestine with lengthening                           |
|    | JFB20 Ileocaecal resection                                                         |
|    | JFB30 Right hemicolectomy                                                          |
|    | JFB33 Other resection comprising small intestine and colon                         |
|    | JFB40 Resection of transverse colon                                                |
|    | JFB43 Left hemicolectomy                                                           |
|    | JFB46 Resection of sigmoid colon                                                   |
|    | JFB50 Other resection of colon                                                     |
|    | JFB53 Resection of sigmoid colon with partial proctectomy                          |
|    | JFB60 Resection of sigmoid colon with end colostomy                                |
|    | JFB63 Other resection of colon with proximal colostomy and closure of distal stump |
|    | JFB96 Other partial excision of intestine                                          |
|    | JFC00 Entero-enterostomy                                                           |
|    | JFC10 Ileotransversostomy                                                          |
|    | JFC20 Other enterocolostomy                                                        |
|    | JFC30 Colo-colostomy                                                               |
|    | JFC40 Ileorectostomy                                                               |
|    | JFC50 Colorectostomy                                                               |
|    | JFD00 Jejunioleal bypass                                                           |
|    | JFD03 Duodenoileal bypass with biliopancreatic diversion                           |
|    | JFD10 Revision of jejunioleal bypass                                               |
|    | JFD13 Revision of duodenoileal bypass                                              |



|    |                                                                                       |
|----|---------------------------------------------------------------------------------------|
| 1  |                                                                                       |
| 2  |                                                                                       |
| 3  | JFD20 Restoration of continuity after jejunoileal bypass                              |
| 4  | JFD23 Restoration of continuity after duodenoileal bypass                             |
| 5  | JFD96 Other intestinal bypass operation                                               |
| 6  | JFE00 Transplantation of small intestine                                              |
| 7  | JFE96 Other operation relating to transplantation of small intestine                  |
| 8  | JFF00 Catheter enterostomy                                                            |
| 9  | JFF10 Loop enterostomy                                                                |
| 10 | JFF13 Terminal enterostomy                                                            |
| 11 | JFF20 Caecostomy                                                                      |
| 12 | JFF23 Transversostomy                                                                 |
| 13 | JFF26 Sigmoidostomy                                                                   |
| 14 | JFF30 Other colostomy                                                                 |
| 15 | JFF40 Appendicostomy                                                                  |
| 16 | JFF50 Exteriorisation of loop of colon without opening                                |
| 17 | JFF60 Opening of exteriorised loop of colon                                           |
| 18 | JFF96 Other exteriorisation of intestine or creation of intestinal stoma              |
| 19 | JFG00 Closure of loop enterostomy without resection                                   |
| 20 | JFG10 Closure of loop colostomy without resection                                     |
| 21 | JFG20 Closure of enterostomy with resection of exteriorised loop                      |
| 22 | JFG23 Closure of terminal enterostomy with anastomosis to small intestine             |
| 23 | JFG26 Closure of terminal enterostomy with anastomosis to colon                       |
| 24 | JFG30 Closure of colostomy with resection of exteriorised loop                        |
| 25 | JFG33 Closure of terminal colostomy with anastomosis to colon                         |
| 26 | JFG36 Closure of terminal colostomy with anastomosis to rectum                        |
| 27 | JFG40 Revision of enterostomy or colostomy without laparotomy                         |
| 28 | JFG50 Laparotomy with revision of enterostomy or colostomy                            |
| 29 | JFG53 Revision of ileal pelvic pouch                                                  |
| 30 | JFG56 Revision of colonic pelvic pouch                                                |
| 31 | JFG60 Conversion of conventional ileostomy to continent ileostomy                     |
| 32 | JFG70 Conversion of continent ileostomy to conventional ileostomy                     |
| 33 | JFG73 Excision of ileal pelvic pouch                                                  |
| 34 | JFG76 Excision of colonic pelvic pouch with colorectal or coloanal anastomosis        |
| 35 | JFG80 Excision of ileal pouch with construction of new continent ileostomy            |
| 36 | JFG83 Excision of colonic pelvic pouch and construction of new pouch                  |
| 37 | JFG86 Excision of ileal pelvic pouch and construction of new pouch                    |
| 38 | JFG96 Other operation on intestinal stoma or pouch                                    |
| 39 | JFH00 Total colectomy and ileorectal anastomosis                                      |
| 40 | JFH10 Total colectomy and ileostomy                                                   |
| 41 | JFH20 Proctocolectomy and ileostomy                                                   |
| 42 | JFH30 Total colectomy, mucosal proctectomy and ileoanal anastomosis without ileostomy |
| 43 | JFH33 Total colectomy, mucosal proctectomy, ileoanal anastomosis and ileostomy        |
| 44 | JFH40 Proctocolectomy and continent ileostomy                                         |
| 45 | JFH96 Other total colectomy                                                           |
| 46 | JFJ00 Coecopexy                                                                       |
| 47 | JFJ96 Other enteropexy or colopexy                                                    |
| 48 | JFK00 Division of adhesive band in intestinal obstruction                             |
| 49 |                                                                                       |
| 50 |                                                                                       |
| 51 |                                                                                       |
| 52 |                                                                                       |
| 53 |                                                                                       |
| 54 |                                                                                       |
| 55 |                                                                                       |
| 56 |                                                                                       |
| 57 |                                                                                       |
| 58 |                                                                                       |
| 59 |                                                                                       |
| 60 |                                                                                       |

|       |                                                                                      |
|-------|--------------------------------------------------------------------------------------|
| JFK10 | Freeing of adhesions in intestinal obstruction                                       |
| JFK20 | Freeing of adhesions and plication of small intestine                                |
| JFK96 | Other operation on adhesions in intestinal obstruction                               |
| JFL00 | Open reduction of intussusception of intestine                                       |
| JFL10 | Laparotomy and manipulation of obstructed intestine                                  |
| JFL20 | Laparotomy and manipulation of impacted material                                     |
| JFL96 | Other operation for intestinal obstruction without resection or freeing of adhesions |
| JFM00 | Intraoperative irrigation of colon                                                   |
| JFW96 | Other operation on intestine                                                         |
| JGA00 | Proctotomy                                                                           |
| JGA60 | Suture of rectum                                                                     |
| JGA70 | Proctotomy and excision of lesion of rectum                                          |
| JGA73 | Transanal excision of lesion of rectum                                               |
| JGA76 | Stapled transanal rectal resection                                                   |
| JGA96 | Other proctotomy or local operation on rectum                                        |
| JGB00 | Partial proctectomy and colorectal or coloanal anastomosis                           |
| JGB03 | Partial proctectomy with partial excision of mesorectum                              |
| JGB06 | Partial proctectomy with total excision of mesorectum                                |
| JGB10 | Partial proctectomy and end colostomy                                                |
| JGB20 | Partial rectosigmoidectomy and abdominoperineal pull-through anastomosis             |
| JGB30 | Abdominoperineal excision of rectum                                                  |
| JGB33 | Abdominoperineal excision of rectum with intersphincteric dissection                 |
| JGB36 | Wide excision of rectum                                                              |
| JGB40 | Excision of rectum and end ileostomy                                                 |
| JGB50 | Mucosal proctectomy and ileoanal anastomosis                                         |
| JGB60 | Excision of rectum and ileoanal anastomosis                                          |
| JGB96 | Other proctectomy or excision of rectum                                              |
| JGC00 | Rectopexy                                                                            |
| JGC10 | Perineal rectopexy                                                                   |
| JGC20 | Transanal suture                                                                     |
| JGC30 | Excision and suture of rectal mucosa with imbrication of muscular layer              |
| JGC40 | Anorectal repair of anal atresia                                                     |
| JGC96 | Other reconstructive operation on rectum                                             |
| JGD00 | Excision of perineal local recurrence of tumour                                      |
| JGW96 | Other operation on rectum                                                            |

Table 8. NCSP-N codes for procedures on the liver

| Code  | Title                         |
|-------|-------------------------------|
| JJA00 | Exploration of liver          |
| JJA10 | Hepatotomy                    |
| JJA20 | Open biopsy of liver          |
| JJA23 | Open needle biopsy of liver   |
| JJA30 | Fenestration of cyst of liver |
| JJA40 | Excision of lesion of liver   |

|       |                                                              |
|-------|--------------------------------------------------------------|
| JJA43 | Destruction of lesion of liver                               |
| JJA50 | Suture of liver                                              |
| JJA96 | Other local operation on liver                               |
| JJB00 | Wedge resection of liver                                     |
| JJB10 | Atypical resection of liver                                  |
| JJB20 | Excision of single segment of liver                          |
| JJB30 | Excision of two segments of liver                            |
| JJB40 | Excision of segments II, III and IV of liver                 |
| JJB50 | Excision of segments V, VI, VII and VIII of liver            |
| JJB53 | Excision of segments IV,V, VI, VII and VIII of liver         |
| JJB60 | Other excision of three or more segments of liver            |
| JJB96 | Other resection of liver                                     |
| JJC00 | Allogenic transplantation of liver                           |
| JJC10 | Allogenic partial transplantation of liver                   |
| JJC20 | Allogenic partial transplantation of liver from living donor |
| JJC30 | Xenogenic transplantation of liver                           |
| JJC40 | Xenogenic partial transplantation of liver                   |
| JJC50 | Resection of transplanted liver                              |
| JJC60 | Total excision of transplanted liver                         |
| JJC96 | Other transplantation of liver or related operation          |
| JJW96 | Other operation on liver                                     |

*Table 9. NCSP-N codes for procedures on biliary tract*

| Code  | Title                                                                            |
|-------|----------------------------------------------------------------------------------|
| JKA00 | Cholecystotomy                                                                   |
| JKA10 | Cholecystostomy                                                                  |
| JKA13 | Percutaneous cholecystostomy                                                     |
| JKA20 | Cholecystectomy                                                                  |
| JKA96 | Other operation on gallbladder                                                   |
| JKB00 | Incision of bile duct                                                            |
| JKB20 | Intraoperative cholangioscopy                                                    |
| JKB40 | Suture of bile duct                                                              |
| JKB96 | Other incision or related operation on bile duct                                 |
| JKC00 | Incision of bile duct and local excision of lesion                               |
| JKC10 | Partial excision and anastomosis of bile duct                                    |
| JKC20 | Partial excision of bile duct and anastomosis to duodenum                        |
| JKC30 | Partial excision of bile duct and anastomosis to jejunum                         |
| JKC40 | Partial excision of right or left hepatic duct and anastomosis to jejunum        |
| JKC50 | Excision of papilla of Vater and anastomosis of bile duct to duodenum or jejunum |
| JKC96 | Other excision of bile duct                                                      |
| JKD00 | Anastomosis of gallbladder to jejunum                                            |
| JKD10 | Anastomosis of bile duct to duodenum                                             |
| JKD20 | Anastomosis of bile duct to jejunum                                              |

|       |                                                                     |
|-------|---------------------------------------------------------------------|
| JKD30 | Extrahepatic anastomosis of right or left hepatic duct to jejunum   |
| JKD40 | Anastomosis of intrahepatic bile duct to jejunum                    |
| JKD50 | Hepatoportoenterostomy                                              |
| JKD96 | Other biliodigestive anastomosis without excision                   |
| JKE00 | Transduodenal papillotomy                                           |
| JKE06 | Transduodenal sphincteroplasty                                      |
| JKE96 | Other transduodenal open operation on bile duct or ampulla of Vater |
| JKF00 | Excision of cystic duct                                             |
| JKF10 | Percutaneous extraction of biliary calculus                         |
| JKF96 | Other secondary operation on biliary tract                          |
| JKW96 | Other operation on biliary tract                                    |

Table 10. NCSP-N codes for procedures on the pancreas

| Code  | Title                                                                   |
|-------|-------------------------------------------------------------------------|
| JLA00 | Exploration of pancreas                                                 |
| JLA10 | Biopsy of pancreas                                                      |
| JLA20 | Needle biopsy of pancreas                                               |
| JLB00 | Incision of pancreas                                                    |
| JLB10 | Pancreaticolithotomy                                                    |
| JLB96 | Other incision, drainage or dilatation of pancreas                      |
| JLC00 | Excision of lesion of pancreas                                          |
| JLC10 | Distal pancreatectomy                                                   |
| JLC20 | Total pancreatectomy                                                    |
| JLC30 | Pancreatoduodenectomy                                                   |
| JLC40 | Total pancreatoduodenectomy                                             |
| JLC50 | Atypical pancreatectomy                                                 |
| JLC96 | Other pancreatectomy                                                    |
| JLD00 | Pancreaticojejunostomy                                                  |
| JLD10 | Anastomosis of pancreatic pseudocyst to stomach                         |
| JLD20 | Anastomosis of pancreatic pseudocyst to jejunum                         |
| JLE00 | Allogenic total transplantation of pancreas with pancreaticocystostomy  |
| JLE03 | Allogenic total transplantation of pancreas with pancreaticoenterostomy |
| JLE10 | Allogenic segmental transplantation of pancreas                         |
| JLE16 | Allogenic segmental transplantation of pancreas from living donor       |
| JLE20 | Allogenic islet cell transplantation                                    |
| JLE30 | Xenogenic islet cell transplantation                                    |
| JLE40 | Total excision of transplanted pancreas                                 |
| JLE50 | Occlusion of duct of transplanted pancreas                              |
| JLE56 | Conversion of pancreaticocystostomy to pancreaticoenterostomy           |
| JLE96 | Other transplantation of pancreas or related operation                  |
| JLW96 | Other operation on pancreas                                             |

Table 11. NCSP-N codes for procedures on the spleen

| Code  | Title                            |
|-------|----------------------------------|
| JMA00 | Partial splenectomy              |
| JMA10 | Transabdominal total splenectomy |
| JMA20 | Transthoracic total splenectomy  |
| JMB00 | Biopsy of spleen                 |
| JMB10 | Repair of spleen                 |
| JMW96 | Other operation on spleen        |

Table 12. NCSP-N codes for other digestive system procedures

| Code  | Title                                                                                  |
|-------|----------------------------------------------------------------------------------------|
| JAH00 | Laparotomy                                                                             |
| JAH20 | Staging laparotomy                                                                     |
| JAH30 | Laparostomy                                                                            |
| JAH33 | Revision of laparostomy                                                                |
| JAH40 | Thoracolumbarotomy                                                                     |
| JAJ00 | Rectal incision and drainage of pelvic abscess                                         |
| JAK00 | Laparotomy and drainage of peritoneal cavity                                           |
| JAK03 | Laparotomy and peritoneal irrigation                                                   |
| JAK10 | Laparotomy and insertion of peritoneal dialysis catheter                               |
| JAL00 | Biopsy of peritoneum                                                                   |
| JAL10 | Laparotomy and removal of foreign body                                                 |
| JAL20 | Excision or destruction of lesion of peritoneum                                        |
| JAL23 | Excision of local lesion of pelvic wall                                                |
| JAL30 | Omentectomy                                                                            |
| JAL50 | Intraabdominal revision of shunt of ventricle of brain                                 |
| JAL96 | Other local operation on peritoneum or peritoneal cavity                               |
| JAM00 | Transposition of omentum                                                               |
| JAM10 | Operation for malrotation of intestine                                                 |
| JAN00 | Creation of peritoneovenous shunt                                                      |
| JAN10 | Revision of peritoneovenous shunt                                                      |
| JAN20 | Removal of peritoneovenous shunt                                                       |
| JAP00 | Freeing of adhesions in the peritoneal cavity                                          |
| JAQ00 | Extensive excision of peritoneum                                                       |
| JAQ10 | Intraoperative hyperthermic chemotherapeutic perfusion of abdominal cavity             |
| JAW96 | Other operation on abdominal wall, peritoneum, mesentery or omentum                    |
| JBA00 | Transabdominal repair of diaphragm for rupture                                         |
| JBA10 | Transabdominal biopsy or excision of lesion of diaphragm                               |
| JBA20 | Transabdominal partial excision of diaphragm                                           |
| JBW96 | Other transabdominal operation on diaphragm or operation for gastro-oesophageal reflux |
| JKT00 | Extracorporeal shock wave lithotripsy of gallbladder                                   |
| JKT10 | Extracorporeal shock wave lithotripsy of biliary duct                                  |

Table 13. NCSP-N codes for procedures on kidney and pelvis of kidney

| Code  | Title                                                         |
|-------|---------------------------------------------------------------|
| KAA00 | Exploration of kidney                                         |
| KAA20 | Exploratory nephrotomy                                        |
| KAA30 | Exploratory pyelotomy                                         |
| KAA96 | Other exploration of kidney or pelvis of kidney               |
| KAB00 | Biopsy of kidney or pelvis of kidney                          |
| KAC00 | Nephrectomy                                                   |
| KAC20 | Nephroureterectomy                                            |
| KAD00 | Partial nephrectomy                                           |
| KAD10 | Heminephrectomy                                               |
| KAD40 | Partial excision of pelvis of kidney                          |
| KAD50 | Destruction of tumour of pelvis of kidney                     |
| KAD56 | Destruction of lesion of renal parenchyma                     |
| KAD60 | Percutaneous destruction of lesion of renal parenchyma        |
| KAD96 | Other partial excision of kidney or pelvis of kidney          |
| KAE00 | Nephrolithotomy                                               |
| KAE10 | Pyelolithotomy                                                |
| KAE96 | Other removal of calculus from kidney or pelvis of kidney     |
| KAF00 | Removal of foreign body from kidney                           |
| KAF10 | Removal of foreign body from pelvis of kidney                 |
| KAH00 | Suture of kidney                                              |
| KAH10 | Suture of pelvis of kidney                                    |
| KAH30 | Pyeloureteroplasty without division of ureteropelvic junction |
| KAH40 | Pyeloureteroplasty with division of ureteropelvic junction    |
| KAH50 | Ureterocalyceal anastomosis                                   |
| KAH70 | Freeing of adhesions of ureteropelvic junction                |
| KAH80 | Nephropexy                                                    |
| KAH96 | Other reconstruction of kidney or pelvis of kidney            |
| KAS00 | Autotransplantation of kidney                                 |
| KAS10 | Allogenic transplantation of kidney from cadaver donor        |
| KAS20 | Allogenic transplantation of kidney from living donor         |
| KAS40 | Excision of transplanted kidney                               |
| KAS50 | Nephrocystostomy in transplanted kidney                       |
| KAS60 | Operation for lymphocele of transplanted kidney               |
| KAS96 | Other transplantation of kidney or related procedure          |
| KAW96 | Other operation on kidney or pelvis of kidney                 |

Table 14. NCSP-N codes for procedures on other urinary and male genital organs: ureter, bladder, urethra, prostate and seminal vesicles

| Code  | Title                                                               |
|-------|---------------------------------------------------------------------|
| KBA00 | Exploration of ureter                                               |
| KBA10 | Exploratory ureterotomy                                             |
| KBA96 | Other exploration of ureter                                         |
| KBB00 | Biopsy of ureter                                                    |
| KBC00 | Ureterectomy                                                        |
| KBD00 | Partial excision of ureter                                          |
| KBD20 | Destruction of tumour of ureter                                     |
| KBD30 | Excision of stump of ureter                                         |
| KBD96 | Other partial excision of ureter or destruction of tumour of ureter |
| KBE00 | Ureterolithotomy                                                    |
| KBE96 | Other operation for calculus of ureter                              |
| KBF00 | Removal of foreign body from ureter                                 |
| KBH00 | Suture of ureter                                                    |
| KBH06 | Ureteroureterostomy                                                 |
| KBH10 | Connection of ureter to contralateral ureter                        |
| KBH20 | Replantation of ureter                                              |
| KBH30 | Ileal replacement of ureter                                         |
| KBH40 | Plastic repair of ureter                                            |
| KBH50 | Ureterolysis                                                        |
| KBH96 | Other repair or connection of ureter                                |
| KBJ00 | Cutaneous ureterostomy                                              |
| KBJ10 | Cutaneous ureteroenterostomy                                        |
| KBJ20 | Cutaneous ureteroenterostomy with reservoir                         |
| KBJ40 | Ureteroenterostomy                                                  |
| KBJ60 | Anastomosis of ureter to urethra with interposition of ileum        |
| KBJ70 | Removal of calculus from ileal conduit or reservoir                 |
| KBJ80 | Operation for malfunction of urinary diversion                      |
| KBJ96 | Other urinary diversion from ureter or related operation            |
| KBT00 | Extracorporeal shock wave lithotripsy of ureter                     |
| KBV00 | Insertion of stent into ureter                                      |
| KBV10 | Removal of stent from ureter                                        |
| KBV40 | Incision or excision of ureterocele                                 |
| KBW96 | Other operation on ureter                                           |
| KCA00 | Exploratory cystotomy                                               |
| KCB00 | Biopsy of bladder                                                   |
| KCC00 | Cystectomy                                                          |
| KCC10 | Cystoprostatectomy                                                  |
| KCC20 | Cystoprostatectomy with excision of female internal genital organs  |
| KCC30 | Cystectomy with excision of female internal genital organs          |
| KCC96 | Other cystectomy                                                    |
| KCD10 | Partial cystectomy                                                  |

|    |       |                                                                        |
|----|-------|------------------------------------------------------------------------|
| 1  |       |                                                                        |
| 2  |       |                                                                        |
| 3  | KCD20 | Excision of diverticulum of bladder                                    |
| 4  | KCD30 | Destruction of tumour of bladder                                       |
| 5  | KCD40 | Excision of urachus                                                    |
| 6  | KCD96 | Other partial excision or destruction of tumour of bladder             |
| 7  | KCE00 | Cystolithotomy                                                         |
| 8  | KCF00 | Cystotomy and removal of foreign body from bladder                     |
| 9  | KCH00 | Suture of bladder                                                      |
| 10 | KCH10 | Enterocystoplasty                                                      |
| 11 | KCH20 | Reduction cystoplasty                                                  |
| 12 | KCH30 | Closure of vesicointestinal fistula                                    |
| 13 | KCH40 | Incision or resection of bladder neck                                  |
| 14 | KCH96 | Other reconstructive operation on bladder                              |
| 15 | KCJ00 | Cystostomy                                                             |
| 16 | KCJ10 | Cutaneous cystoenterostomy                                             |
| 17 | KCJ20 | Continent cutaneous cystoenterostomy                                   |
| 18 | KCJ96 | Other cystostomy                                                       |
| 19 | KCT00 | Extracorporeal shock wave lithotripsy of bladder                       |
| 20 | KCV10 | Denervation of bladder                                                 |
| 21 | KCV20 | Freeing of bladder                                                     |
| 22 | KCW96 | Other operations on bladder                                            |
| 23 | KDC00 | Urethrectomy                                                           |
| 24 | KDD00 | Partial excision of urethra                                            |
| 25 | KDD10 | Excision of diverticulum of urethra                                    |
| 26 | KDD30 | Destruction of tumour of urethra                                       |
| 27 | KDD40 | Resection of external sphincter of urethra                             |
| 28 | KDD50 | Excision of urethral valve                                             |
| 29 | KDD80 | Partial excision of urethra and repair using graft or flap             |
| 30 | KDD96 | Other partial excision of urethra                                      |
| 31 | KDG00 | Retropubic suspension of urethra                                       |
| 32 | KDG10 | Abdominovaginal suspension of bladder neck                             |
| 33 | KDG20 | Abdominal colposuspension                                              |
| 34 | KDG30 | Suprapubic sling urethrocystopexy                                      |
| 35 | KDG40 | Suprapubic urethrocystopexy                                            |
| 36 | KDG43 | Transobturatorial sling urethrocystopexy                               |
| 37 | KDG50 | Transabdominal plastic repair of pelvic floor for urinary incontinence |
| 38 | KDG60 | Implantation of adjustable expander around bladder neck                |
| 39 | KDG96 | Other operation on urethra or bladder neck for incontinence            |
| 40 | KDH00 | Suture of urethra                                                      |
| 41 | KDH10 | Meatoplasty of urethra                                                 |
| 42 | KDH30 | Closure of urethrocutaneous fistula                                    |
| 43 | KDH50 | Closure of urethrointestinal fistula                                   |
| 44 | KDH70 | Plastic repair of stricture of urethra                                 |
| 45 | KDH96 | Other reconstructive operation on urethra                              |
| 46 | KDJ00 | Urethrostomy                                                           |
| 47 |       |                                                                        |
| 48 |       |                                                                        |
| 49 |       |                                                                        |
| 50 |       |                                                                        |
| 51 |       |                                                                        |
| 52 |       |                                                                        |
| 53 |       |                                                                        |
| 54 |       |                                                                        |
| 55 |       |                                                                        |
| 56 |       |                                                                        |
| 57 |       |                                                                        |
| 58 |       |                                                                        |
| 59 |       |                                                                        |
| 60 |       |                                                                        |



|       |                                                                    |
|-------|--------------------------------------------------------------------|
| KDK00 | Implantation of artificial urinary sphincter around bladder neck   |
| KDK10 | Implantation of artificial urinary sphincter around bulbar urethra |
| KDK30 | Revision of artificial urethral sphincter                          |
| KDK40 | Removal of artificial urethral sphincter                           |
| KDV00 | Insertion of stent into urethra                                    |
| KDV10 | Internal urethrotomy                                               |
| KDV20 | Submucous urethral injection                                       |
| KDW96 | Other operation on urethra                                         |
| KEA00 | Exploration of prostate                                            |
| KEA10 | Prostatotomy                                                       |
| KEA20 | Incision of seminal vesicle                                        |
| KEC00 | Retropubic radical prostatectomy                                   |
| KEC10 | Perineal radical prostatectomy                                     |
| KEC20 | Transsacral radical prostatectomy                                  |
| KED00 | Transvesical prostatectomy                                         |
| KED80 | Percutaneous cryotherapy of prostate                               |
| KED96 | Other partial excision of prostate                                 |
| KEE00 | Prostatolithotomy                                                  |
| KEE10 | Removal of foreign body from prostate                              |
| KEW96 | Other operation on prostate or seminal vesicle                     |

Table 15- NCSP-N codes for procedures on female genital organs: ovary, fallopian tube, uterus and uterine ligaments

| Code  | Title                                            |
|-------|--------------------------------------------------|
| LAA00 | Puncture of ovarian cyst                         |
| LAB00 | Ovariectomy                                      |
| LAB10 | Biopsy of ovary                                  |
| LAB96 | Other incision or biopsy of ovary                |
| LAC00 | Excision of ovarian cyst                         |
| LAC10 | Fenestration of ovarian cyst                     |
| LAC20 | Destruction of lesion of ovary                   |
| LAC30 | Excision of paraovarian cyst                     |
| LAC96 | Other excision or destruction of lesion of ovary |
| LAD00 | Partial excision of ovary                        |
| LAE10 | Unilateral oophorectomy                          |
| LAE20 | Bilateral oophorectomy                           |
| LAF00 | Unilateral salpingo-oophorectomy                 |
| LAF10 | Bilateral salpingo-oophorectomy                  |
| LAF20 | Unilateral transvaginal salpingo-oophorectomy    |
| LAF30 | Bilateral transvaginal salpingo-oophorectomy     |
| LAG00 | Freeing of adhesions of ovary                    |
| LAG10 | Oophoropexy                                      |

|       |                                                       |
|-------|-------------------------------------------------------|
| 1     |                                                       |
| 2     |                                                       |
| 3     |                                                       |
| 4     |                                                       |
| 5     |                                                       |
| 6     |                                                       |
| 7     |                                                       |
| 8     |                                                       |
| 9     |                                                       |
| 10    |                                                       |
| 11    |                                                       |
| 12    |                                                       |
| 13    |                                                       |
| 14    |                                                       |
| 15    |                                                       |
| 16    |                                                       |
| 17    |                                                       |
| 18    |                                                       |
| 19    |                                                       |
| 20    |                                                       |
| 21    |                                                       |
| 22    |                                                       |
| 23    |                                                       |
| 24    |                                                       |
| 25    |                                                       |
| 26    |                                                       |
| 27    |                                                       |
| 28    |                                                       |
| 29    |                                                       |
| 30    |                                                       |
| 31    |                                                       |
| 32    |                                                       |
| 33    |                                                       |
| 34    |                                                       |
| 35    |                                                       |
| 36    |                                                       |
| 37    |                                                       |
| 38    |                                                       |
| 39    |                                                       |
| 40    |                                                       |
| 41    |                                                       |
| 42    |                                                       |
| 43    |                                                       |
| 44    |                                                       |
| 45    |                                                       |
| 46    |                                                       |
| 47    |                                                       |
| 48    |                                                       |
| 49    |                                                       |
| 50    |                                                       |
| 51    |                                                       |
| 52    |                                                       |
| 53    |                                                       |
| 54    |                                                       |
| 55    |                                                       |
| 56    |                                                       |
| 57    |                                                       |
| 58    |                                                       |
| 59    |                                                       |
| 60    |                                                       |
| LAG20 | Detorsion of ovary                                    |
| LAG96 | Other reconstructive operation on ovary               |
| LAW96 | Other operation on ovary                              |
| LBB00 | Biopsy of Fallopian tube                              |
| LBB96 | Other biopsy of Fallopian tube                        |
| LBC10 | Removal of products of conception from Fallopian tube |
| LBC20 | Salpingotomy and removal of products of conception    |
| LBC96 | Other tube conserving operation for tubal pregnancy   |
| LBD00 | Partial excision of Fallopian tube                    |
| LBE00 | Salpingectomy                                         |
| LBF00 | Perfusion of Fallopian tube                           |
| LBF03 | Perfusion of Fallopian tube after reconstruction      |
| LBF20 | Transcervical catheter salpingoplasty                 |
| LBF30 | Salpingolysis                                         |
| LBF40 | Fimbrioplasty                                         |
| LBF50 | Salpingostomy                                         |
| LBF60 | Partial excision and anastomosis of Fallopian tube    |
| LBF70 | Partial excision and reimplantation of Fallopian tube |
| LBF96 | Other operation on Fallopian tube for infertility     |
| LBW96 | Other operation on Fallopian tube                     |
| LCA00 | Biopsy of uterus or uterine ligaments                 |
| LCB00 | Hysterotomy                                           |
| LCB10 | Myomectomy                                            |
| LCB20 | Transvaginal myomectomy                               |
| LCB96 | Other excision of lesion of uterus                    |
| LCC00 | Partial excision of uterus                            |
| LCC10 | Supravaginal hysterectomy                             |
| LCC20 | Vaginal supravaginal hysterectomy                     |
| LCC96 | Other partial excision of uterus                      |
| LCD00 | Hysterectomy                                          |
| LCD10 | Vaginal hysterectomy                                  |
| LCD30 | Radical hysterectomy                                  |
| LCD40 | Radical vaginal hysterectomy                          |
| LCD96 | Other hysterectomy                                    |
| LCE00 | Anterior exenteration of female pelvis                |
| LCE10 | Posterior exenteration of female pelvis               |
| LCE20 | Total exenteration of female pelvis                   |
| LCE96 | Other exenteration of female pelvis                   |
| LCF00 | Excision of lesion of parametrium                     |
| LCF10 | Excision of female varicocele                         |
| LCF96 | Other excision of lesion of parametrium               |
| LCG10 | Suture of uterus                                      |
| LCG20 | Hysteropexy                                           |
| LCG30 | Resection or transcision of sacrouterine ligaments    |

|       |                                                 |
|-------|-------------------------------------------------|
| LCG40 | Reconstruction of uterus                        |
| LCG96 | Other reconstructive operation on uterus        |
| LCW96 | Other operation on uterus and uterine ligaments |

Table 16. NCSP-N codes for procedures on the peripheral vessels of the abdomen

| Code  | Title                                                               |
|-------|---------------------------------------------------------------------|
| PCB20 | Ligature of coeliac trunk and branches                              |
| PCB30 | Ligature of superior mesenteric artery                              |
| PCB40 | Ligature of renal artery                                            |
| PCB99 | Ligature of other visceral artery                                   |
| PCC10 | Suture of suprarenal or juxtarenal abdominal aorta                  |
| PCC20 | Suture of coeliac trunk and branches                                |
| PCC30 | Suture of superior mesenteric artery                                |
| PCC40 | Suture of renal artery                                              |
| PCC99 | Suture of other visceral artery                                     |
| PCE30 | Thrombectomy or embolectomy of superior mesenteric artery           |
| PCE40 | Thrombectomy or embolectomy of renal artery                         |
| PCE99 | Thrombectomy or embolectomy of other visceral artery                |
| PCF20 | Thrombendarterectomy of coeliac trunk and branches                  |
| PCF30 | Thrombendarterectomy of superior mesenteric artery                  |
| PCF40 | Thrombendarterectomy of renal artery                                |
| PCF99 | Thrombendarterectomy of other visceral artery                       |
| PCG10 | Operation for aneurysm of supraceliac or juxtarenal abdominal aorta |
| PCG20 | Operation for aneurysm of coeliac trunk and branches                |
| PCG30 | Operation for aneurysm of superior mesenteric artery                |
| PCG40 | Operation for aneurysm of renal artery                              |
| PCG99 | Operation for aneurysm of other visceral artery                     |
| PCH10 | Bypass from supraceliac or juxtarenal abdominal aorta               |
| PCH20 | Bypass from coeliac trunk and branches                              |
| PCH30 | Bypass from superior mesenteric artery                              |
| PCH40 | Bypass from renal artery                                            |
| PCH99 | Bypass from other visceral artery                                   |
| PCJ30 | Transposition of superior mesenteric artery                         |
| PCJ40 | Transposition of renal artery                                       |
| PCJ99 | Transposition of other visceral artery                              |
| PCK20 | Reimplantation of coeliac trunk and branches                        |
| PCK30 | Reimplantation of superior mesenteric artery                        |
| PCK40 | Reimplantation of renal artery                                      |
| PCK50 | Reimplantation of inferior mesenteric artery                        |
| PCK99 | Reimplantation of other visceral artery                             |
| PCN20 | Plastic repair of coeliac trunk and branches                        |

|       |                                                                                                               |
|-------|---------------------------------------------------------------------------------------------------------------|
| 1     |                                                                                                               |
| 2     |                                                                                                               |
| 3     |                                                                                                               |
| 4     |                                                                                                               |
| 5     |                                                                                                               |
| 6     |                                                                                                               |
| 7     |                                                                                                               |
| 8     |                                                                                                               |
| 9     |                                                                                                               |
| 10    |                                                                                                               |
| 11    |                                                                                                               |
| 12    |                                                                                                               |
| 13    |                                                                                                               |
| 14    |                                                                                                               |
| 15    |                                                                                                               |
| 16    |                                                                                                               |
| 17    |                                                                                                               |
| 18    |                                                                                                               |
| 19    |                                                                                                               |
| 20    |                                                                                                               |
| 21    |                                                                                                               |
| 22    |                                                                                                               |
| 23    |                                                                                                               |
| 24    |                                                                                                               |
| 25    |                                                                                                               |
| 26    |                                                                                                               |
| 27    |                                                                                                               |
| 28    |                                                                                                               |
| 29    |                                                                                                               |
| 30    |                                                                                                               |
| 31    |                                                                                                               |
| 32    |                                                                                                               |
| 33    |                                                                                                               |
| 34    |                                                                                                               |
| 35    |                                                                                                               |
| 36    |                                                                                                               |
| 37    |                                                                                                               |
| 38    |                                                                                                               |
| 39    |                                                                                                               |
| 40    |                                                                                                               |
| 41    |                                                                                                               |
| 42    |                                                                                                               |
| 43    |                                                                                                               |
| 44    |                                                                                                               |
| 45    |                                                                                                               |
| 46    |                                                                                                               |
| 47    |                                                                                                               |
| 48    |                                                                                                               |
| 49    |                                                                                                               |
| 50    |                                                                                                               |
| 51    |                                                                                                               |
| 52    |                                                                                                               |
| 53    |                                                                                                               |
| 54    |                                                                                                               |
| 55    |                                                                                                               |
| 56    |                                                                                                               |
| 57    |                                                                                                               |
| 58    |                                                                                                               |
| 59    |                                                                                                               |
| 60    |                                                                                                               |
| PCN30 | Plastic repair of superior mesenteric artery                                                                  |
| PCN40 | Plastic repair of renal artery                                                                                |
| PCN99 | Plastic repair of other visceral artery                                                                       |
| PCU70 | Exploration of previous reconstruction of suprarenal abdominal aorta or visceral arteries                     |
| PCU74 | Thrombectomy or embolectomy in bypass from suprarenal abdominal aorta and visceral arteries                   |
| PCU81 | Closure of persisting arteriovenous fistula of bypass from suprarenal abdominal aorta and visceral arteries   |
| PCU82 | Plastic repair in bypass from suprarenal abdominal aorta and visceral arteries                                |
| PCU99 | Other repair after previous reconstruction of suprarenal abdominal aorta and visceral arteries                |
| PCW99 | Other operation on suprarenal abdominal aorta and visceral arteries                                           |
| PDA10 | Exploration of infrarenal abdominal aorta                                                                     |
| PDA30 | Exploration of iliac artery                                                                                   |
| PDC10 | Suture of infrarenal abdominal aorta                                                                          |
| PDC30 | Suture of iliac artery                                                                                        |
| PDE10 | Thrombectomy or embolectomy of infrarenal abdominal aorta                                                     |
| PDE30 | Thrombectomy or embolectomy of iliac artery                                                                   |
| PDF10 | Thrombendarterectomy of infrarenal abdominal aorta                                                            |
| PDF30 | Thrombendarterectomy of iliac artery                                                                          |
| PDG10 | Operation on infrarenal abdominal aorta for aneurysm                                                          |
| PDG20 | Bypass from aorta to iliac artery for aneurysm                                                                |
| PDG21 | Bypass from aorta to bilateral iliac arteries for aneurysm                                                    |
| PDG22 | Bypass from aorta to iliac and contralateral femoral artery for aneurysm                                      |
| PDG23 | Bypass from aorta to femoral artery for aneurysm                                                              |
| PDG24 | Bypass from aorta to bilateral femoral arteries for aneurysm                                                  |
| PDG30 | Operation on iliac artery for aneurysm                                                                        |
| PDG35 | Bypass from iliac to femoral artery for aneurysm                                                              |
| PDG99 | Other operation for aneurysm of infrarenal abdominal aorta and iliac arteries                                 |
| PDH10 | Bypass from infrarenal abdominal aorta                                                                        |
| PDH20 | Bypass from aorta to iliac artery                                                                             |
| PDH21 | Bypass from aorta to bilateral iliac arteries                                                                 |
| PDH22 | Bypass from aorta to iliac and contralateral femoral artery                                                   |
| PDH23 | Bypass from aorta to femoral artery                                                                           |
| PDH24 | Bypass from aorta to bilateral femoral arteries                                                               |
| PDH30 | Bypass from iliac artery                                                                                      |
| PDH35 | Bypass from iliac to femoral artery                                                                           |
| PDH99 | Other bypass from abdominal aorta or iliac artery                                                             |
| PDN10 | Plastic repair of infrarenal abdominal aorta                                                                  |
| PDN30 | Plastic repair of iliac artery                                                                                |
| PDU70 | Exploration of previous reconstruction of infrarenal abdominal aorta or iliac arteries and distal connections |
| PDU74 | Thrombectomy or embolectomy in bypass from infrarenal abdominal aorta or iliac artery                         |
| PDU81 | Closure of persisting arteriovenous fistula of bypass from infrarenal abdominal aorta or iliac artery         |
| PDU82 | Plastic repair of bypass from infrarenal abdominal aorta or iliac artery                                      |

|       |                                                                                                        |
|-------|--------------------------------------------------------------------------------------------------------|
| PDU99 | Other repair after previous reconstruction of infrarenal abdominal aorta and iliac arteries and distal |
| PDW99 | Other operation on infrarenal abdominal aorta and iliac arteries and distal connections                |
| PHB23 | Ligature of iliac vein                                                                                 |
| PHB30 | Ligature of inferior vena cava                                                                         |
| PHB31 | Ligature of renal vein                                                                                 |
| PHB32 | Ligature of portal vein                                                                                |
| PHB33 | Ligature of superior mesenteric vein                                                                   |
| PHB34 | Ligature of inferior mesenteric vein                                                                   |
| PHB36 | Ligature of spermatic vein                                                                             |
| PHC23 | Suture of iliac vein                                                                                   |
| PHC30 | Suture of inferior vena cava                                                                           |
| PHC31 | Suture of renal vein                                                                                   |
| PHC32 | Suture of portal vein                                                                                  |
| PHC33 | Suture of superior mesenteric vein                                                                     |
| PHC34 | Suture of inferior mesenteric vein                                                                     |
| PHD30 | Resection of inferior vena cava                                                                        |
| PHD32 | Resection of portal vein                                                                               |
| PHD33 | Resection of superior mesenteric vein                                                                  |
| PHD34 | Resection of inferior mesenteric vein                                                                  |
| PHD36 | Resection of spermatic vein                                                                            |
| PHE23 | Thrombectomy of iliac vein                                                                             |
| PHE30 | Thrombectomy of inferior vena cava                                                                     |
| PHE31 | Thrombectomy of renal vein                                                                             |
| PHH25 | Bypass from iliac vein                                                                                 |
| PHH30 | Bypass from inferior vena cava                                                                         |
| PHN30 | Plastic repair of inferior vena cava                                                                   |
| PHN32 | Plastic repair of portal vein                                                                          |
| PHN33 | Plastic repair of superior mesenteric vein                                                             |
| PHN34 | Plastic repair of inferior mesenteric vein                                                             |
| PHW35 | Portosystemic shunt or bypass                                                                          |

**The RECORD statement – checklist of items, extended from the STROBE statement, that should be reported in observational studies using routinely collected health data.**

|                           | Item No. | STROBE items                                                                                                                                                                               | Location in manuscript where items are reported | RECORD items                                                                                                                                                                                                                                                                                                                                                                                                                                | Location in manuscript where items are reported                                                                |
|---------------------------|----------|--------------------------------------------------------------------------------------------------------------------------------------------------------------------------------------------|-------------------------------------------------|---------------------------------------------------------------------------------------------------------------------------------------------------------------------------------------------------------------------------------------------------------------------------------------------------------------------------------------------------------------------------------------------------------------------------------------------|----------------------------------------------------------------------------------------------------------------|
| <b>Title and abstract</b> |          |                                                                                                                                                                                            |                                                 |                                                                                                                                                                                                                                                                                                                                                                                                                                             |                                                                                                                |
|                           | 1        | (a) Indicate the study's design with a commonly used term in the title or the abstract (b) Provide in the abstract an informative and balanced summary of what was done and what was found | Title                                           | RECORD 1.1: The type of data used should be specified in the title or abstract. When possible, the name of the databases used should be included.<br><br>RECORD 1.2: If applicable, the geographic region and timeframe within which the study took place should be reported in the title or abstract.<br><br>RECORD 1.3: If linkage between databases was conducted for the study, this should be clearly stated in the title or abstract. | Title and abstract<br><br>Abstract 1 21<br><br>Title and abstract 1 20-21<br><br>No linkages between databases |
| <b>Introduction</b>       |          |                                                                                                                                                                                            |                                                 |                                                                                                                                                                                                                                                                                                                                                                                                                                             |                                                                                                                |
| Background rationale      | 2        | Explain the scientific background and rationale for the investigation being reported                                                                                                       | Introduction, 1 49-73                           |                                                                                                                                                                                                                                                                                                                                                                                                                                             |                                                                                                                |
| Objectives                | 3        | State specific objectives, including any prespecified hypotheses                                                                                                                           | Introduction, 1 74-79                           |                                                                                                                                                                                                                                                                                                                                                                                                                                             |                                                                                                                |
| <b>Methods</b>            |          |                                                                                                                                                                                            |                                                 |                                                                                                                                                                                                                                                                                                                                                                                                                                             |                                                                                                                |
| Study Design              | 4        | Present key elements of study design early in the paper                                                                                                                                    | Abstract, 1 20-30.                              |                                                                                                                                                                                                                                                                                                                                                                                                                                             |                                                                                                                |
| Setting                   | 5        | Describe the setting, locations, and relevant dates, including periods of recruitment, exposure, follow-up, and data collection                                                            | Materials and methods                           |                                                                                                                                                                                                                                                                                                                                                                                                                                             |                                                                                                                |
| Participants              | 6        | (a) <i>Cohort study</i> - Give the eligibility criteria, and the                                                                                                                           | Materials and methods, 1. 81-82                 | RECORD 6.1: The methods of study population selection (such as codes or                                                                                                                                                                                                                                                                                                                                                                     | Materials and methods, 1 96-109.                                                                               |

|                           |   |                                                                                                                                                                                                                                                                                                                                                                                                                                                                                                                                                                                                                                                             |                                                                                                                       |                                                                                                                                                                                                                                                                                                                                                                                                                                                                                                                                                                                                                              |                                                                                                                                                                                        |
|---------------------------|---|-------------------------------------------------------------------------------------------------------------------------------------------------------------------------------------------------------------------------------------------------------------------------------------------------------------------------------------------------------------------------------------------------------------------------------------------------------------------------------------------------------------------------------------------------------------------------------------------------------------------------------------------------------------|-----------------------------------------------------------------------------------------------------------------------|------------------------------------------------------------------------------------------------------------------------------------------------------------------------------------------------------------------------------------------------------------------------------------------------------------------------------------------------------------------------------------------------------------------------------------------------------------------------------------------------------------------------------------------------------------------------------------------------------------------------------|----------------------------------------------------------------------------------------------------------------------------------------------------------------------------------------|
|                           |   | <p>sources and methods of selection of participants. Describe methods of follow-up</p> <p><i>Case-control study</i> - Give the eligibility criteria, and the sources and methods of case ascertainment and control selection. Give the rationale for the choice of cases and controls</p> <p><i>Cross-sectional study</i> - Give the eligibility criteria, and the sources and methods of selection of participants</p> <p>(b) <i>Cohort study</i> - For matched studies, give matching criteria and number of exposed and unexposed</p> <p><i>Case-control study</i> - For matched studies, give matching criteria and the number of controls per case</p> | <p>and 196-109</p>                                                                                                    | <p>algorithms used to identify subjects) should be listed in detail. If this is not possible, an explanation should be provided.</p> <p>RECORD 6.2: Any validation studies of the codes or algorithms used to select the population should be referenced. If validation was conducted for this study and not published elsewhere, detailed methods and results should be provided.</p> <p>RECORD 6.3: If the study involved linkage of databases, consider use of a flow diagram or other graphical display to demonstrate the data linkage process, including the number of individuals with linked data at each stage.</p> | <p>All codes are listed in the Supplementary File</p> <p>References to validation studies are given in Introduction, 166-69, and in Discussion, 196</p> <p>Not considered relevant</p> |
| Variables                 | 7 | Clearly define all outcomes, exposures, predictors, potential confounders, and effect modifiers. Give diagnostic criteria, if applicable.                                                                                                                                                                                                                                                                                                                                                                                                                                                                                                                   | Materials and methods, 196-109, and Supplementary File. Model variables are specified in Statistical methods, 115-120 | RECORD 7.1: A complete list of codes and algorithms used to classify exposures, outcomes, confounders, and effect modifiers should be provided. If these cannot be reported, an explanation should be provided.                                                                                                                                                                                                                                                                                                                                                                                                              | Codes are listed in the Supplementary File                                                                                                                                             |
| Data sources/ measurement | 8 | For each variable of interest, give sources of data and details of methods of assessment (measurement). Describe comparability of assessment methods if there is more than one group                                                                                                                                                                                                                                                                                                                                                                                                                                                                        | Covered by the above                                                                                                  |                                                                                                                                                                                                                                                                                                                                                                                                                                                                                                                                                                                                                              |                                                                                                                                                                                        |
| Bias                      | 9 | Describe any efforts to address potential sources of bias                                                                                                                                                                                                                                                                                                                                                                                                                                                                                                                                                                                                   | Hospital PWD rates are risk adjusted, see                                                                             |                                                                                                                                                                                                                                                                                                                                                                                                                                                                                                                                                                                                                              |                                                                                                                                                                                        |

|                                                                                                                                                    |                                  |    |                                                                                                                                                                                                                                                                                                                                                                                                                                                                                                                                                                      |                                                                                                                                                                                                                                   |                                                                                        |
|----------------------------------------------------------------------------------------------------------------------------------------------------|----------------------------------|----|----------------------------------------------------------------------------------------------------------------------------------------------------------------------------------------------------------------------------------------------------------------------------------------------------------------------------------------------------------------------------------------------------------------------------------------------------------------------------------------------------------------------------------------------------------------------|-----------------------------------------------------------------------------------------------------------------------------------------------------------------------------------------------------------------------------------|----------------------------------------------------------------------------------------|
|                                                                                                                                                    |                                  |    | statistical methods 1<br>115-120                                                                                                                                                                                                                                                                                                                                                                                                                                                                                                                                     |                                                                                                                                                                                                                                   |                                                                                        |
| 1<br>2<br>3<br>4                                                                                                                                   | Study size                       | 10 | Explain how the study size was arrived at                                                                                                                                                                                                                                                                                                                                                                                                                                                                                                                            | Determined by study period                                                                                                                                                                                                        |                                                                                        |
| 5<br>6<br>7<br>8<br>9                                                                                                                              | Quantitative variables           | 11 | Explain how quantitative variables were handled in the analyses. If applicable, describe which groupings were chosen, and why                                                                                                                                                                                                                                                                                                                                                                                                                                        | Model variables are specified in Statistical methods, 1. 115-120                                                                                                                                                                  |                                                                                        |
| 10<br>11<br>12<br>13<br>14<br>15<br>16<br>17<br>18<br>19<br>20<br>21<br>22<br>23<br>24<br>25<br>26<br>27<br>28<br>29<br>30<br>31<br>32<br>33<br>34 | Statistical methods              | 12 | (a) Describe all statistical methods, including those used to control for confounding<br>(b) Describe any methods used to examine subgroups and interactions<br>(c) Explain how missing data were addressed<br>(d) <i>Cohort study</i> - If applicable, explain how loss to follow-up was addressed<br><i>Case-control study</i> - If applicable, explain how matching of cases and controls was addressed<br><i>Cross-sectional study</i> - If applicable, describe analytical methods taking account of sampling strategy<br>(e) Describe any sensitivity analyses | a) See Statistical methods<br>c) No missing data were found in final data set<br>d) Loss to follow up assumed to be very low and uniform across hospitals<br>e) Materials and methods, 1 131-134, Results, 1 173-174              |                                                                                        |
| 35<br>36<br>37<br>38<br>39<br>40<br>41<br>42<br>43<br>44                                                                                           | Data access and cleaning methods |    | ..                                                                                                                                                                                                                                                                                                                                                                                                                                                                                                                                                                   | RECORD 12.1: Authors should describe the extent to which the investigators had access to the database population used to create the study population.<br><br>RECORD 12.2: Authors should provide information on the data cleaning | The authors had no access to the NPR's databases<br><br>Materials and methods, 1 89-91 |



|                                                                            |                  |    |                                                                                                                                                                                                                                                                                                                                                 |                                                                                                                                                                                                                           |                                                                                                                                                                                                                                                                                                                    |
|----------------------------------------------------------------------------|------------------|----|-------------------------------------------------------------------------------------------------------------------------------------------------------------------------------------------------------------------------------------------------------------------------------------------------------------------------------------------------|---------------------------------------------------------------------------------------------------------------------------------------------------------------------------------------------------------------------------|--------------------------------------------------------------------------------------------------------------------------------------------------------------------------------------------------------------------------------------------------------------------------------------------------------------------|
|                                                                            |                  |    |                                                                                                                                                                                                                                                                                                                                                 | methods used in the study.                                                                                                                                                                                                |                                                                                                                                                                                                                                                                                                                    |
| 1<br>2<br>3<br>4<br>5<br>6<br>7                                            | Linkage          | .. |                                                                                                                                                                                                                                                                                                                                                 | RECORD 12.3: State whether the study included person-level, institutional-level, or other data linkage across two or more databases. The methods of linkage and methods of linkage quality evaluation should be provided. | NPR provided linkage to National Registry using the unique PIN                                                                                                                                                                                                                                                     |
| 8                                                                          | <b>Results</b>   |    |                                                                                                                                                                                                                                                                                                                                                 |                                                                                                                                                                                                                           |                                                                                                                                                                                                                                                                                                                    |
| 9                                                                          | Participants     | 13 | (a) Report the numbers of individuals at each stage of the study ( <i>e.g.</i> , numbers potentially eligible, examined for eligibility, confirmed eligible, included in the study, completing follow-up, and analysed)<br>(b) Give reasons for non-participation at each stage.<br>(c) Consider use of a flow diagram                          | Results, 1 146-151                                                                                                                                                                                                        | RECORD 13.1: Describe in detail the selection of the persons included in the study ( <i>i.e.</i> , study population selection) including filtering based on data quality, data availability and linkage. The selection of included persons can be described in the text and/or by means of the study flow diagram. |
| 10<br>11<br>12<br>13<br>14<br>15<br>16<br>17<br>18<br>19<br>20<br>21       | Descriptive data | 14 | (a) Give characteristics of study participants ( <i>e.g.</i> , demographic, clinical, social) and information on exposures and potential confounders<br>(b) Indicate the number of participants with missing data for each variable of interest<br>(c) <i>Cohort study</i> - summarise follow-up time ( <i>e.g.</i> , average and total amount) | a) Results, Table 1<br>b) See above<br>c) Not relevant                                                                                                                                                                    |                                                                                                                                                                                                                                                                                                                    |
| 22<br>23<br>24<br>25<br>26<br>27<br>28<br>29<br>30<br>31<br>32<br>33<br>34 | Outcome data     | 15 | <i>Cohort study</i> - Report numbers of outcome events or summary measures over time<br><i>Case-control study</i> - Report numbers in each exposure category, or summary measures of exposure<br><i>Cross-sectional study</i> - Report                                                                                                          | Results, Table 1                                                                                                                                                                                                          |                                                                                                                                                                                                                                                                                                                    |

|                                                                                                 |                |                                               |                                                                                                                                                                                                                                                                                                                                                                                                                 |                                          |                                                                                                                                                                                                                                                                                                          |
|-------------------------------------------------------------------------------------------------|----------------|-----------------------------------------------|-----------------------------------------------------------------------------------------------------------------------------------------------------------------------------------------------------------------------------------------------------------------------------------------------------------------------------------------------------------------------------------------------------------------|------------------------------------------|----------------------------------------------------------------------------------------------------------------------------------------------------------------------------------------------------------------------------------------------------------------------------------------------------------|
|                                                                                                 |                | numbers of outcome events or summary measures |                                                                                                                                                                                                                                                                                                                                                                                                                 |                                          |                                                                                                                                                                                                                                                                                                          |
| 1<br>2<br>3<br>4<br>5<br>6<br>7<br>8<br>9<br>10<br>11<br>12<br>13<br>14<br>15<br>16<br>17<br>18 | Main results   | 16                                            | (a) Give unadjusted estimates and, if applicable, confounder-adjusted estimates and their precision (e.g., 95% confidence interval). Make clear which confounders were adjusted for and why they were included<br>(b) Report category boundaries when continuous variables were categorized<br>(c) If relevant, consider translating estimates of relative risk into absolute risk for a meaningful time period | Results, l 156-157 and Figure 1, Table 2 |                                                                                                                                                                                                                                                                                                          |
| 19<br>20<br>21<br>22                                                                            | Other analyses | 17                                            | Report other analyses done—e.g., analyses of subgroups and interactions, and sensitivity analyses                                                                                                                                                                                                                                                                                                               | Results, l 168-174, Figure 1             |                                                                                                                                                                                                                                                                                                          |
| <b>Discussion</b>                                                                               |                |                                               |                                                                                                                                                                                                                                                                                                                                                                                                                 |                                          |                                                                                                                                                                                                                                                                                                          |
| 24<br>25<br>26                                                                                  | Key results    | 18                                            | Summarise key results with reference to study objectives                                                                                                                                                                                                                                                                                                                                                        | Discussion, l 176-184                    |                                                                                                                                                                                                                                                                                                          |
| 27<br>28<br>29<br>30<br>31<br>32<br>33<br>34<br>35                                              | Limitations    | 19                                            | Discuss limitations of the study, taking into account sources of potential bias or imprecision. Discuss both direction and magnitude of any potential bias                                                                                                                                                                                                                                                      |                                          | RECORD 19.1: Discuss the implications of using data that were not created or collected to answer the specific research question(s). Include discussion of misclassification bias, unmeasured confounding, missing data, and changing eligibility over time, as they pertain to the study being reported. |
| 36<br>37<br>38<br>39<br>40<br>41<br>42<br>43<br>44                                              | Interpretation | 20                                            | Give a cautious overall interpretation of results considering objectives, limitations, multiplicity of analyses, results from similar studies, and other relevant evidence                                                                                                                                                                                                                                      | Conclusions, l 220-231                   | Discussion, l 198-218                                                                                                                                                                                                                                                                                    |

|                                        |                                                           |    |                                                                                                                                                               |                                  |                                                                                                                                                          |                                  |
|----------------------------------------|-----------------------------------------------------------|----|---------------------------------------------------------------------------------------------------------------------------------------------------------------|----------------------------------|----------------------------------------------------------------------------------------------------------------------------------------------------------|----------------------------------|
| 1<br>2<br>3                            | Generalisability                                          | 21 | Discuss the generalisability (external validity) of the study results                                                                                         | Discussion, 1 214-218            |                                                                                                                                                          |                                  |
| 4                                      | <b>Other Information</b>                                  |    |                                                                                                                                                               |                                  |                                                                                                                                                          |                                  |
| 5<br>6<br>7<br>8<br>9                  | Funding                                                   | 22 | Give the source of funding and the role of the funders for the present study and, if applicable, for the original study on which the present article is based | No specific funding was received |                                                                                                                                                          |                                  |
| 10<br>11<br>12<br>13<br>14<br>15<br>16 | Accessibility of protocol, raw data, and programming code |    | ..                                                                                                                                                            |                                  | RECORD 22.1: Authors should provide information on how to access any supplemental information such as the study protocol, raw data, or programming code. | Contact the corresponding author |

\*Reference: Benchimol EI, Smeeth L, Guttman A, Harron K, Moher D, Petersen I, Sørensen HT, von Elm E, Langan SM, the RECORD Working Committee. The REporting of studies Conducted using Observational Routinely-collected health Data (RECORD) Statement. *PLoS Medicine* 2015; in press.

\*Checklist is protected under Creative Commons Attribution ([CC BY](https://creativecommons.org/licenses/by/4.0/)) license.

# BMJ Open

## POSTOPERATIVE WOUND DEHISCENCE AFTER LAPAROTOMY: A USEFUL HEALTH CARE QUALITY INDICATOR? A COHORT STUDY BASED ON NORWEGIAN HOSPITAL ADMINISTRATIVE DATA

|                                 |                                                                                                                                                                                                                                                                                                                                                                                                                                                                                                                                                                                                                                                                                                               |
|---------------------------------|---------------------------------------------------------------------------------------------------------------------------------------------------------------------------------------------------------------------------------------------------------------------------------------------------------------------------------------------------------------------------------------------------------------------------------------------------------------------------------------------------------------------------------------------------------------------------------------------------------------------------------------------------------------------------------------------------------------|
| Journal:                        | <i>BMJ Open</i>                                                                                                                                                                                                                                                                                                                                                                                                                                                                                                                                                                                                                                                                                               |
| Manuscript ID                   | bmjopen-2018-026422.R1                                                                                                                                                                                                                                                                                                                                                                                                                                                                                                                                                                                                                                                                                        |
| Article Type:                   | Research                                                                                                                                                                                                                                                                                                                                                                                                                                                                                                                                                                                                                                                                                                      |
| Date Submitted by the Author:   | 16-Dec-2018                                                                                                                                                                                                                                                                                                                                                                                                                                                                                                                                                                                                                                                                                                   |
| Complete List of Authors:       | Helgeland , Jon ; Norwegian Institute of Public Health, Division of Health Services<br>Tomic, Oliver; Norwegian University of Life Sciences, Department of Mathematic Sciences and Technology<br>Hansen, Tonya; Norwegian Institute of Public Health, Division of Health Services<br>Kristoffersen, Doris; Norwegian Institute of Public Health, Division of Health Services<br>Hassani, Sahar; University of Oslo, KG Jebsen Centre for Psychosis Research, Institute of Clinical Medicine; Oslo University Hospital, Department of Medical Genetics<br>Lindahl, Anne; Akershus University Hospital Trust, Division of Surgery; University of Oslo, Department of Health Administration and Health Economics |
| <b>Primary Subject Heading</b>: | Surgery                                                                                                                                                                                                                                                                                                                                                                                                                                                                                                                                                                                                                                                                                                       |
| Secondary Subject Heading:      | Health services research                                                                                                                                                                                                                                                                                                                                                                                                                                                                                                                                                                                                                                                                                      |
| Keywords:                       | Quality in health care < HEALTH SERVICES ADMINISTRATION & MANAGEMENT, Patient safety, WOUND MANAGEMENT                                                                                                                                                                                                                                                                                                                                                                                                                                                                                                                                                                                                        |
|                                 |                                                                                                                                                                                                                                                                                                                                                                                                                                                                                                                                                                                                                                                                                                               |

SCHOLARONE™  
Manuscripts

1  
2  
3  
4  
5 1 **POSTOPERATIVE WOUND DEHISCENCE AFTER LAPAROTOMY: A**  
6  
7  
8  
9 2 **USEFUL HEALTH CARE QUALITY INDICATOR? A COHORT STUDY**  
10  
11  
12  
13  
14 3 **BASED ON NORWEGIAN HOSPITAL ADMINISTRATIVE DATA**  
15  
16  
17

18 4 Jon Helgeland<sup>1,7</sup>, Oliver Tomic<sup>2</sup>, Tonya Moen Hansen<sup>1</sup>, Doris Tove Kristoffersen<sup>1</sup>, Sahar Hassani<sup>3,4</sup>,  
19  
20 5 Anne Karin Lindahl<sup>5,6</sup>

21  
22 6 <sup>1</sup> Division of Health Services, Norwegian Institute of Public Health, Oslo, Norway

23  
24 7 <sup>2</sup> Department of Mathematical Sciences and Technology, Norwegian University of Life Sciences, Ås,  
25  
26 8 Norway

27  
28 9 <sup>3</sup> NORMENT, KG Jebsen Centre for Psychosis Research, Division of Mental Health and Addiction, Oslo  
29  
30 10 University Hospital and Institute of Clinical Medicine, University of Oslo, Oslo, Norway

31  
32 11 <sup>4</sup> Department of Medical Genetics, Oslo University Hospital, Oslo, Norway

33  
34 12 <sup>5</sup> Division of Surgery, Akershus University Hospital Trust, Lørenskog, Norway

35  
36 13 <sup>6</sup>Department of Health administration and health economics, Institute of Health and Society,  
37  
38 14 University of Oslo, Oslo, Norway

39  
40 15 <sup>7</sup>Corresponding author: Jon Helgeland, [jon.helgeland@fhi.no](mailto:jon.helgeland@fhi.no)

41  
42 16 Norwegian Institute of Public Health, PO Box 222 Skøyen, N-0213 Oslo

43  
44 17 Word count: 3106

45  
46 18 Keywords: Postoperative wound dehiscence, Surgical Quality, Quality Indicators, Patient Safety

47  
48  
49  
50  
51  
52 19  
53  
54  
55  
56  
57  
58  
59  
60

## 20 ABSTRACT

### 21 Objectives

22 Postoperative wound dehiscence (PWD) is a serious complication to laparotomy, leading to higher  
23 mortality, readmissions and cost. The aims of the present study are to investigate whether risk  
24 adjusted PWD rates could reliably differentiate between Norwegian hospitals, and whether PWD  
25 rates were associated with hospital characteristics such as hospital type and laparotomy volume.

### 26 Design

27 Observational study using patient administrative data from all Norwegian hospitals, obtained from  
28 the Norwegian Patient Registry, for the period 2011-2015, and linked using the unique person  
29 identification number.

### 30 Participants

31 All patients undergoing laparotomy, at least 15 years old, with length of stay at least two days, and  
32 no diagnosis code for immunocompromised state or relating to pregnancy, childbirth and  
33 puerperium. The final data set comprised 66 925 patients with 78 086 laparotomy episodes from 47  
34 hospitals.

### 35 Outcomes

36 The outcome was wound dehiscence, identified by the presence of a wound reclosure code, risk  
37 adjusted for patient characteristics and operation type.

## 38 Results

39 The final data set comprised 1 477 wound dehiscences. Crude PWD rates varied from 0% to 5.1%  
40 among hospitals, with an overall rate of 1.89%. Three hospitals with statistically significantly higher  
41 PWD than average were identified, after case mix adjustment and correction for multiple  
42 comparisons. Hospital volume was not associated with PWD rate, except that hospitals with very few  
43 laparotomies had lower PWD rates.

## 44 Conclusions

45 Among Norwegian hospitals, there is considerable variation in PWD rate that cannot be explained by  
46 operation type, age or comorbidity. This warrants further investigation into possible causes, such as  
47 surgical technique, perioperative procedures or handling of complications. The risk adjusted PWD  
48 rate after laparotomy is a candidate quality indicator for Norwegian hospitals.

## 49 STRENGTHS AND LIMITATIONS OF THIS STUDY

- 50 • Includes all laparotomies performed in the nation over a five-year period, with patients  
51 followed across hospitals
- 52 • Extends previous studies to a new health system and a new coding system
- 53 • The statistical analysis uses methods for low event rates, avoiding asymptotic approximation
- 54 • Results may be subject to coding inaccuracy and incompleteness, as well as selection effects
- 55 • There were no data for surgical technique, nor for some clinical factors known to be relevant.

## 56 INTRODUCTION

57 The past decades have seen a major growth in initiatives for measuring, monitoring, and improving  
58 the quality of health care services. Quality indicators are regularly published in many health care  
59 systems. Performance of health care systems is also compared across nations, for instance in the  
60 OECD Health Care Quality and Outcomes (HCQO) initiative, which Norway is a part of.<sup>1,2</sup> Norway has  
61 a national quality indicator system for monitoring and comparing hospital performance, however,  
62 not all areas of hospital performance are covered by existing national quality indicators. While there  
63 are quality indicators for outcomes such as mortality and process measures such as waiting times,  
64 complications following hospital care is less explored, which is especially relevant following surgical  
65 procedures.

66 Postoperative wound dehiscence (PWD) rates after open abdominal surgery (laparotomies) was  
67 introduced as a patient safety indicator in the United States and later as a quality indicator by  
68 OECD.<sup>3-6</sup> Norway reported the second highest numbers for 2014-2015, with a PWD rate of 1.02%. The  
69 overall range was 0.055% to 1.05%.<sup>5</sup> Neighbouring Sweden, with comparable population health and  
70 health care, reported 0.30%. Moreover, a recent study comparing adverse events in Norway and  
71 Sweden found significantly higher adverse event rates of surgical complications in Norwegian  
72 hospitals, compared to Swedish hospitals.<sup>7</sup>

73 PWD is a serious complication that leads to higher mortality rates, higher implicit, explicit and social  
74 costs as well as increased readmission rates.<sup>8,9</sup> The PWD rate has been studied elsewhere as a quality  
75 indicator for hospitals, and found to have a high positive predictive value.<sup>10,11</sup> It is useful as a quality  
76 indicator, since several of the risk factors are modifiable and within control of the hospital and  
77 surgical team. There are few events per hospital, making it challenging to identify outlier hospitals for  
78 quality improvement because of the high statistical uncertainty.



1  
2  
3 79 Previous research has identified a number of risk factors for PWD. Examples of such factors are: (I)  
4  
5 80 patient related variables and comorbidities: smoking<sup>12</sup>, obesity<sup>13</sup>, chronic pulmonary disease, renal  
6  
7 81 insufficiency or diabetes<sup>14</sup> and use of immunosuppressive agents<sup>15 16</sup>; (II) procedure related factors:  
8  
9 82 operation type<sup>9 17</sup>, type of incision and closure<sup>18-20</sup> and length of operation time<sup>21</sup>; (III) postoperative  
10  
11 83 parameters: clean wound classification<sup>21</sup>, coughing<sup>9</sup> and wound infection<sup>9 14</sup>; (IV) operative scenario:  
12  
13  
14 84 e.g. qualifications of the surgeon<sup>21-23</sup> and of the perioperative team, and whether the surgery is  
15  
16 85 emergent.<sup>9 13</sup>

17  
18  
19  
20 86 The objectives of this study are to study the occurrence and variation of PWD after laparotomy at  
21  
22 87 Norwegian hospitals, and the potential usefulness of a PWD indicator for the Norwegian health care  
23  
24 88 system, computed from patient administrative data. More specifically we aimed to 1) investigate the  
25  
26 89 possibility to identify hospitals with higher or lower laparotomy PWD rate than average, after  
27  
28 90 appropriate risk adjustment, 2) study the variability of the PWD rate among hospitals, and its relation  
29  
30 91 to hospital type and laparotomy volume.  
31  
32  
33  
34  
35

## 36 92 MATERIAL AND METHODS

37  
38  
39  
40 93 Patient administrative data from all Norwegian hospitals were provided by the Norwegian Patient  
41  
42 94 Registry (NPR) for the period 2011-2015.<sup>24</sup> This comprised individual patient data from all  
43  
44 95 department stays: type of admission (acute or elective), primary and secondary diagnosis codes  
45  
46 96 according to the Norwegian version<sup>25</sup> of ICD-10, surgical and medical procedures, age, gender, date  
47  
48 97 and time of ward admission and discharge. Surgical procedures and operations were coded according  
49  
50 98 to the Norwegian version of the NOMESCO Classification of Surgical Procedures (NCSP-N).<sup>26</sup>  
51  
52  
53 99 Procedure time and date were not available. It was therefore not possible to exclude reclosures of  
54  
55 100 wounds occurring before or on the same day as laparotomies within the same episode, as requested  
56  
57 101 in the OECD indicator specification. The NPR data files were checked for missing values and  
58  
59  
60

1  
2  
3 102 inconsistencies between variables, such as date and time of discharge before admission or invalid  
4  
5 103 ICD-10 code.  
6  
7  
8

9 104 Wound dehiscence was defined as the occurrence of a code for a reclosure operation, i.e. a  
10  
11 105 reoperation for wound dehiscence. This excludes superficial dehiscences, as these are usually not  
12  
13 106 resutured, and the code for reclosure operation is restricted to deep wound dehiscences.  
14  
15 107 Laparotomies and wound reclosure operations were identified according to procedure codes. An  
16  
17 108 operation coded with a laparotomy code, signifies an incision into the abdominal wall, through the  
18  
19 109 fascia and with an opening of the abdominal cavity. Laparoscopic and endoscopic procedures were  
20  
21 110 not included. Details of the codes used can be found in the online supplement.  
22  
23  
24  
25

26 111 All permanent residents in Norway have a Personal Identification Number (PIN), registered in the  
27  
28 112 NPR. NPR prepared an encrypted PIN for all patients with a valid PIN, allowing tracking of patients  
29  
30 113 over time and between hospitals. The data were linked with the National Registry to provide data of  
31  
32 114 death (when applicable), using the PIN.  
33  
34  
35

36 115 Ward admissions for each patient, at more than one hospital in case of transfers, were linked into  
37  
38 116 episodes of care when less than eight hours elapsed from time of discharge to the next ward  
39  
40 117 admission.<sup>27</sup> An episode was regarded as acute if the first admission in the episode was coded as  
41  
42 118 non-elective, as a laparotomy episode if it included any procedure code for laparotomy (reclosures  
43  
44 119 not included), and a reclosure episode if a reclosure code was found. The initial data set consisted of  
45  
46 120 all laparotomy and reclosure episodes. Each reclosure episode was linked to the laparotomy episode  
47  
48 121 immediately preceding or coinciding with it. Reclosure episodes with no preceding laparotomy  
49  
50 122 episode within 30 days, as well as laparotomy or reclosure episodes following a reclosure episode  
51  
52 123 within 30 days, were excluded. Note that the linking of laparotomies and reclosures was not part of  
53  
54 124 the original OECD specification, but is required in order to attribute PWD to hospitals and to enable  
55  
56 125 risk adjustment. Following the OECD specification, laparotomy episodes (and consequently any  
57  
58  
59  
60

1  
2  
3 126 linked reclosure episodes) were excluded if a diagnosis code for immunocompromised state or  
4  
5 127 relating to pregnancy, childbirth and puerperium was present, if the length of stay was less than two  
6  
7 128 days, or if the patient's age was less than 15 years. Hospitals with less than 10 laparotomies over the  
8  
9  
10 129 five-year period were excluded. The hospitals belonged to one of three types: regional, large with  
11  
12 130 acute function and small with acute function. For details of the diagnosis and operation codes used,  
13  
14 131 see the online supplement. For risk adjustment, Charlson comorbidities were determined from  
15  
16 132 previous admissions three years prior to, but not including the current episode of care.<sup>27-29</sup> Diagnoses  
17  
18 133 were grouped according to the Clinical Condition Summary system (CCS), adapted to the Norwegian  
19  
20  
21 134 version of ICD-10.<sup>30</sup>  
22  
23  
24

## 25 135 **Statistical methods**

26  
27  
28 136 Risk adjusted probabilities for a laparotomy episode resulting in a reclosure operation were  
29  
30 137 estimated by bias corrected logistic regression.<sup>31</sup> The final model was fit by stepwise regression with  
31  
32 138 the BIC criterion, allowing for potential two-way interactions.  
33  
34  
35

36  
37 139 To identify outlier hospitals, i.e. those with high or low risk adjusted PWD probabilities, estimated  
38  
39 140 hospital effects were compared to a reference value, defined as the 25% trimmed mean of the  
40  
41 141 hospital effects on the logistic scale.<sup>32</sup> As some hospitals reported zero reclosures, ordinary maximum  
42  
43 142 likelihood estimates of the model parameters do not exist, due to separation<sup>33</sup>, and the estimated  
44  
45 143 variances of the fitted parameters, based on their asymptotic distribution, become unreliable. The  
46  
47 144 comparison used an exact test based on the Poisson binomial distribution for the number of PWDs  
48  
49 145 per hospital, using the estimated probabilities for each case, together with parametric bootstrapping  
50  
51 146 to account for the estimation uncertainty in the model parameters. Tests for significance were  
52  
53 147 corrected for multiple comparisons using the Guo-Romano method<sup>34</sup>, and outlier status assigned  
54  
55 148 according to the false discovery rate (FDR). An FDR not exceeding 5% was regarded as significant. For  
56  
57 149 sensitivity analysis, two alternative risk adjustment models were tested, with either a four-category  
58  
59  
60

1  
2  
3 150 grouping of procedures, or with diagnosis categories, instead of the 13-category procedure grouping.  
4

5 151 In addition, a model with the four Norwegian hospital regions was also estimated.  
6  
7

8  
9 152 Hospital volume, modelled by splines<sup>35</sup>, was tested for inclusion in the model. We also performed  
10

11 153 this test after exclusion of hospitals with zero reclosures.  
12  
13

14  
15 154 Finally, the hospital specific effects were modelled as a mixture of two normal distributions. The  
16

17 155 expectation-maximization (EM) algorithm was used, taking into account the estimation variances.  
18

19 156 The mixture model yielded estimates of the quartiles of the hospital odds ratios and the scaled  
20

21 157 interquartile range (normalized by dividing by 1.349, to give the standard deviation in the case of a  
22

23 158 normal distribution) was computed as a measure of spread among hospitals. Bootstrapping of the  
24

25 159 mixture model was used to find a 95% confidence interval for the scaled interquartile range.  
26  
27  
28  
29

## 30 160 Risk adjustment

31  
32  
33 161 The following case-mix variables were included as candidates in the stepwise regression: age, gender,  
34

35 162 indicators for the individual Charlson comorbidities, number of previous hospital admissions two  
36

37 163 years prior to current admission, and whether the episode was acute or elective. A linear trend in  
38

39 164 admission year was also included. Age was modelled by natural splines with knots at the median and  
40

41 165 quartiles.<sup>35</sup> Based on previous studies of risk factors<sup>9,17</sup>, procedures were categorized into 13 types,  
42

43 166 according to the body system or organ involved. The effects of operation types were normalized to  
44

45 167 have zero sum on the logistic scale.  
46  
47  
48  
49

50  
51 168 For a quality indicator, only characteristics of the patient when entering the hospital, are meaningful  
52

53 169 risk adjustment variables. No data were available for smoking, obesity or other patient or case  
54

55 170 characteristics such as nutritional status. There was no information about operation urgency beyond  
56

57 171 the status of the hospital admission or episode as elective or acute.  
58  
59  
60

## 172 Patient and Public Involvement

173 Patients were not involved in the planning, conduct or analysis of this study. The policy of the  
 174 Norwegian Institute of Public health is to publish hospital quality indicators, when they have been  
 175 successfully validated.

## 176 RESULTS

177 The initial data set comprised 96 102 episodes with laparotomy and 1 909 with a reclosure operation.  
 178 After restricting data to reclosures paired with a laparotomy within 30 days, 1 580 reclosures  
 179 remained. After exclusions for pregnancy, childbirth and puerperium or immunocompromised state,  
 180 age and LOS, 78 299 laparotomies remained. Lastly, hospitals with less than 10 laparotomies were  
 181 excluded, yielding a final data set with 66 925 unique patients, 78 086 laparotomies and 1 477  
 182 reclosures from 47 hospitals. Descriptive statistics for the dataset are shown in Table 1. The  
 183 operation types are tabulated in the online Supplement.

184 *Table 1. Descriptive statistics for final data set*

|                                                                           | PWD        | No PWD      |
|---------------------------------------------------------------------------|------------|-------------|
| Age, years, median (quartiles)                                            | 69 (61-78) | 65 (51-75)  |
| Gender, females, n (%)                                                    | 517 (35)   | 43 094 (56) |
| Acute laparotomy episode, n (%)                                           | 657 (44)   | 26 381 (34) |
| Main diagnosis for reclosure episode coded as PWD, n (%)                  | 45 (3.1)   | —           |
| Main diagnosis for reclosure episode coded as deep wound infection, n (%) | 274 (19)   | —           |
| Hospital type for laparotomy episodes                                     |            |             |
| Regional, n (%)                                                           | 545 (37)   | 28 104 (37) |
| Large with acute function, n (%)                                          | 810 (55)   | 40 291 (53) |
| Small with acute function, n (%)                                          | 122 (8.3)  | 8 214 (11)  |
| Comorbidities                                                             |            |             |
| Diabetes with complications, n (%)                                        | 18 (1.2)   | 893 (1.2)   |
| Chronic pulmonary disease, n (%)                                          | 196 (13)   | 5 147 (6.7) |
| Renal disease, n (%)                                                      | 66 (4.5)   | 2 716 (3.5) |

|                                                                   |            |              |
|-------------------------------------------------------------------|------------|--------------|
| 30 day mortality (laparotomy episode), %                          | 67 (4.5)   | 2 668 (3.5)  |
| Length of stay (LOS) laparotomy episode, days, median (quartiles) | 19 (11-29) | 7.4 (4.4-13) |
| Reclosure and matched laparotomy in same episode, n (%)           | 1 211 (82) | —            |
| Converted from laparoscopy or endoscopy to laparotomy, n (%)      | 12 (0.81)  | 578 (0.75)   |
| Robot assistance in laparotomy, n (%)                             | 3 (0.2)    | 404 (0.53)   |

185  
186 From 2011 to 2015, the annual volume of laparotomies decreased somewhat, from 16 730 to 14 419,  
187 while the proportion of acute laparotomies remained stable at around 35%.

188 The overall rate of PWD for the five-year period was 1.89%. Crude PWD rates varied from 0% to 5.1%  
189 among hospitals. After risk adjustment, the range was 0.1% - 5.4%. Table 2 shows the odds ratios of  
190 the final logistic regression model. No interactions were included. The model showed good fit  
191 according to the modified Hosmer-Lemeshow test<sup>36</sup> (p=0.53) and good predictive ability, with an area  
192 under the operating characteristic (c-statistic) of 0.73.

193 *Table 2. Final multivariate logistic model for risk adjustment*

| Variable                                | Adjusted odds ratio | (95% confidence interval) |
|-----------------------------------------|---------------------|---------------------------|
| Year of admission                       | 0.93                | (0.90-0.96)               |
| Age, spline function                    |                     |                           |
| 40 (reference)                          | 1.00                |                           |
| 50                                      | 1.37                | (1.25-1.49)               |
| 60                                      | 1.97                | (1.65-2.36)               |
| 70                                      | 2.39                | (1.97-2.90)               |
| Gender                                  |                     |                           |
| Female (reference)                      | 1                   |                           |
| Male                                    | 2.42                | (2.16-2.72)               |
| Elective laparotomy episode (reference) | 1                   |                           |
| Acute laparotomy episode                | 1.36                | (1.21-1.52)               |
| Chronic pulmonary disease               | 1.72                | (1.47-2.01)               |
| Operation type <sup>a</sup>             |                     |                           |
| Exploratory laparotomy                  | 2.40                | (1.78-3.24)               |
| Hernia (diaphragmal)                    | 2.57                | (1.37-4.81)               |
| Thoracoabdominal aorta                  | 2.08                | (0.85-5.09)               |
| Gastrointestinal tract                  | 2.04                | (1.69-2.46)               |
| Liver                                   | 1.14                | (0.69-1.87)               |

|                                            |      |             |
|--------------------------------------------|------|-------------|
| Biliary tract                              | 0.12 | (0.05-0.28) |
| Pancreas                                   | 0.79 | (0.40-1.58) |
| Spleen                                     | 1.20 | (0.45-3.24) |
| Other digestive system                     | 1.46 | (1.03-2.07) |
| Kidney                                     | 0.09 | (0.03-0.28) |
| Other urinary and male genital organs      | 0.52 | (0.37-0.71) |
| Female genital organs                      | 1.43 | (1.06-1.92) |
| Peripheral vascular surgery                | 1.21 | (0.93-1.57) |
| More than one type of surgery <sup>b</sup> | 2.58 | (2.12-3.15) |
| Hospital                                   |      |             |
| Scaled interquartile range                 | 0.30 | (0.23-0.34) |

194 <sup>a</sup> Odds ratios for operation type is scaled to have geometric mean

21 195 <sup>b</sup> Not counting exploratory laparotomy

23 196

27 197 In Figure 1, risk-adjusted PWD rates are shown for each hospital, plotted versus laparotomy volume  
28  
29 198 and hospital type.

32 199 After significance testing, we identified three hospitals with higher PWD and none with lower PWD  
33  
34  
35 200 than average, when correcting for multiple testing. Without multiple test correction, one additional  
36  
37 201 hospital with high PWD was found to be marginally significant ( $p=0.053$ ).

41 202 In the alternative model including volume, the PWD increased with yearly laparotomy volume from a  
42  
43 203 very low level up to 120 laparotomies per year, after which it remained fairly constant, see Figure 1.  
44  
45 204 The effect of volume was significant ( $p<0.001$ ), also after exclusion of the four smallest volume  
46  
47 205 hospitals with zero reclosures ( $p=0.008$ ). Hospital type coincided almost completely with a grouping  
48  
49 206 of hospitals by volume, and was therefore not tested separately. There was significant variation  
50  
51 207 among regions ( $p<0.001$ ), with the Northern region having the highest and the South-Eastern region  
52  
53  
54 208 the lowest rates. Details can be found in the online supplement. Using diagnosis categories or  
55  
56 209 aggregated operation type as risk adjustment variables resulted in very small changes in risk adjusted  
57  
58  
59 210 PWD rates.

## 211 DISCUSSION

212 We have studied wound dehiscence after laparotomy, as a quality indicator based on the OECD  
213 specification, and found that it discriminated between Norwegian hospitals. The indicator was risk  
214 adjusted for differences in age, gender, comorbidity and type of surgery, and showed little sensitivity  
215 to changes in the set of risk adjustment variables. The overall PWD rate was 1.89%. After risk  
216 adjustment, the hospitals' PWD rate varied between 0.1% and 5.4%. Laparotomy volume and type of  
217 hospital had little effect on the PWD rate, except for hospitals with very low volume. Advanced age,  
218 male gender, chronic pulmonary disease, and emergency laparotomy were all significant risk factors  
219 for PWD. There were significant PWD differences according to the organ system targeted. The overall  
220 rate of PWD showed a small but statistically significant decline over the observation period 2011-  
221 2015. The relatively large variation of PWD rates between hospitals, after correction for patient  
222 characteristics and operation type, indicates possible variation in the quality of healthcare among  
223 hospitals. This may be due to variation in surgical technique and perioperative care, as well as the  
224 handling of postoperative complications, such as wound infection, which is known to be a risk factor  
225 for PWD.<sup>17</sup> We found PWD rates well within the range reported in international studies.<sup>9 13 14 17 21 37 38</sup>  
226 Also, the risk factors identified are in accordance with previous studies, albeit limited to  
227 administrative data. Laparotomy volume has negligible effect apart from the few hospitals with very  
228 low volume. A Japanese study reported a similar conclusion, while volume was found to have effect  
229 in US hospitals.<sup>39 40</sup> The effect is likely a result of the types of operations performed at the low-  
230 volume hospitals, compared with the other hospitals.

231 Our study is based on complete data from all Norwegian hospitals performing laparotomies. It was  
232 possible to track patients during transfers and reoperations at different hospitals. To the best of our  
233 knowledge, no similar study has been performed. NPR, the data source, has been validated for  
234 several disease categories with respect to identification of cases based on diagnoses and/or



1  
2  
3 235 procedures, and found to have a very high degree of completeness, compared to Norwegian national  
4  
5 236 medical quality registries.<sup>41-44</sup> At the time of writing, the completeness of NPR, after 24 registries  
6  
7 237 have been studied, ranges from 83.5% to 99.8%.<sup>24</sup>  
8  
9

10  
11 238 We cannot exclude a residual imbalance in case mix, affecting PWD through e.g. smoking or obesity,  
12  
13 239 which are known risk factors. There is regional variation in the prevalence of smoking and obesity in  
14  
15 240 Norway.<sup>45</sup> Obesity is more prevalent in Northern Norway, where PWD rates are somewhat higher.  
16  
17 241 However, in some other areas where obesity is less prevalent, the rates are similar. There is no  
18  
19 242 consistent correspondence between the known variation in smoking among counties and PWD rates.  
20  
21 243 Some surgical procedures are performed only at regional hospitals, and it is therefore possible that  
22  
23 244 selection effects are present. In that case, one would expect larger changes in PWD rates after risk  
24  
25 245 adjustment for operation type, which was not found. One potential source of error in our study is the  
26  
27 246 completeness and correctness of coding in the NPR, particularly the coding of reclosure operations.  
28  
29 247 The risk adjustment depends on data from previous hospitalization and may not capture all  
30  
31 248 comorbidities. Moreover, selection effects cannot not be ruled out. Differing policies for operations  
32  
33 249 on patients with known risk factors, e.g. obesity or smoking, would likely cause variation in PWD  
34  
35 250 rates. Patients who die before reoperation or are managed by other means will not be registered.  
36  
37 251 We believe that this applies to very few patients and would not influence our results. No attempt  
38  
39 252 was made to identify main operation or operation intent, as this would require a classification effort  
40  
41 253 outside the scope of the present study.  
42  
43  
44  
45  
46  
47

48 254 Previous studies have shown that the quality indicator has high positive predictive value, but only  
49  
50 255 moderate sensitivity.<sup>10 46 47</sup> Since we have used specific wound reclosure codes, similar to those used  
51  
52 256 in previous studies, we expect a high positive predictive value in Norway as well. Conceivably, the  
53  
54 257 sensitivity depends on the coding system, in particular the various alternative codes related to  
55  
56 258 complications. Sensitivity in Norway may thus differ from that of other healthcare systems. A recent  
57  
58 259 retrospective medical record study from neighbouring Sweden reports that 86.9% of wound  
59  
60

1  
2  
3 260 dehiscences were reoperated.<sup>38</sup> Norway has an activity-based system for financing hospitals, which is  
4  
5 261 an incentive to report all reclosure operations.  
6  
7  
8

## 9 262 **Conclusions**

10  
11 263 Among Norwegian hospitals, there is a significant variation in PWD rate after laparotomies that  
12  
13 264 cannot be explained by operation type, age, comorbidity or whether the admission was elective or  
14  
15 265 acute. This warrants further investigation into possible causes, such as patient related factors,  
16  
17 266 surgical technique, perioperative procedures or handling of complications, e.g. wound infections.  
18  
19  
20 267 Some of these factors are known to be amenable.<sup>20 48</sup> The relatively large between-hospital variation  
21  
22 268 found in the present study is an indication of potential for improvement. The risk adjusted PWD rate  
23  
24 269 after laparotomy is a candidate for use as a quality indicator for Norwegian hospitals, and will make it  
25  
26 270 possible to identify hospitals with apparent quality problems. To achieve sufficient discrimination,  
27  
28 271 however, five-year data are desirable, making it more difficult to monitor changes in hospital  
29  
30 272 performance resulting from quality improvement efforts. It lies outside the scope of the present  
31  
32 273 study to perform a comprehensive validation of the PWD rate as a quality indicator suitable for  
33  
34 274 public reporting. There are uncertainties and potential biases in the indicator, implying that it must  
35  
36 275 be regarded as a signal for follow-up within hospitals, rather than giving a final verdict of inferior or  
37  
38 276 superior quality. For reporting on surgical quality, several indicators should be used to give a  
39  
40 277 balanced view of the different aspects of quality and patient safety.  
41  
42  
43  
44  
45  
46

## 47 278 **FOOTNOTES**

### 48 49 50 51 279 **Funding**

52  
53  
54  
55 280 This research did not receive any grants from any funding agency in the public, commercial or not-  
56  
57 281 for-profit sectors.  
58  
59  
60

## 282 Competing interests

283 The authors have no competing interests.

## 284 Authors' contributions

285 AKL and OT conceived the study. DTK, TMH, OT, and SH participated in data preparation. OT, SH and

286 AKL contributed to the analysis. OT helped draft the manuscript. JH was responsible for the statistical

287 analysis and final manuscript. All authors revised and approved the final manuscript.

## 288 Ethics approval

289 The study was approved by the Norwegian Directorate of Health and the Norwegian Data Protection

290 Authority.

## 291 Data sharing

292 The data set contains indirectly identifiable personal data, and cannot be shared without express

293 permission from the Norwegian Patient Registry. For further information, contact the corresponding

294 author.

295 *Figure 1. Risk adjusted PWD rates versus yearly laparotomy volume, by hospital type. Trend*  
296 *curve is obtained by smoothing the scatterplot. Significance testing is adjusted for multiple*  
297 *comparisons*

## 298 REFERENCES

299

300

301 1. Carinci F, Van Gool K, Mainz J, et al. Towards actionable international comparisons of health  
302 system performance: expert revision of the OECD framework and quality indicators. *Int J*

- 1  
2  
3 303 *Qual Health Care* 2015;27(2):137-46. doi: 10.1093/intqhc/mzv004 [published Online First:  
4 304 2015/03/12]
- 5 305 2. OECD. Health Care Quality and Outcomes: OECD; 2018 [Available from:  
6 306 <http://www.oecd.org/health/health-systems/health-care-quality-and-outcomes.htm>  
7 307 accessed 2018-06-06 2018.
- 8 308 3. Hannan EL. Using mortality data for profiling hospital quality of care and targeting substandard  
9 309 care. *J Soc Health Syst* 1989;1(1):31-48.
- 10 310 4. Miller MR, Elixhauser A, Zhan C, et al. Patient Safety Indicators: using administrative data to  
11 311 identify potential patient safety concerns. *Health Serv Res* 2001;36(6 Pt 2):110-32. [published  
12 312 Online First: 2005/09/09]
- 13 313 5. OECD. Health Care Quality Indicators - Patient Safety 2018 [Available from:  
14 314 <http://www.oecd.org/health/health-systems/hcqi-patient-safety.htm> accessed 2018-06-06  
15 315 2018.
- 16 316 6. OECD. Definitions for Health Care Quality Indicators 2016-2017 HCQI Data Collection: OECD,  
17 317 2016:113.
- 18 318 7. Deilkas ET, Risberg MB, Haugen M, et al. Exploring similarities and differences in hospital adverse  
19 319 event rates between Norway and Sweden using Global Trigger Tool. *BMJ open*  
20 320 2017;7(3):e012492. doi: 10.1136/bmjopen-2016-012492
- 21 321 8. Hannan EL, Bernard HR, O'Donnell JF, et al. A methodology for targeting hospital cases for quality  
22 322 of care record reviews. *Am J Public Health* 1989;79(4):430-6.
- 23 323 9. van Ramshorst GH, Nieuwenhuizen J, Hop WC, et al. Abdominal wound dehiscence in adults:  
24 324 development and validation of a risk model. *World J Surg* 2010;34(1):20-7. doi:  
25 325 <https://dx.doi.org/10.1007/s00268-009-0277-y>
- 26 326 10. Romano PS, Mull HJ, Rivard PE, et al. Validity of selected AHRQ patient safety indicators based on  
27 327 VA National Surgical Quality Improvement Program data. *Health Serv Res* 2009;44(1):182-  
28 328 204. doi: <https://dx.doi.org/10.1111/j.1475-6773.2008.00905.x>
- 29 329 11. Rosen AK, Itani KM, Cevasco M, et al. Validating the patient safety indicators in the Veterans  
30 330 Health Administration: do they accurately identify true safety events? *Med Care*  
31 331 2012;50(1):74-85. doi: <https://dx.doi.org/10.1097/MLR.0b013e3182293edf>
- 32 332 12. Kean J. The effects of smoking on the wound healing process. *J Wound Care* 2010;19(1):5-8. doi:  
33 333 10.12968/jowc.2010.19.1.46092
- 34 334 13. Shanmugam VK, Fernandez SJ, Evans KK, et al. Postoperative wound dehiscence: Predictors and  
35 335 associations. *Wound Repair Regen* 2015;23(2):184-90. doi:  
36 336 <https://dx.doi.org/10.1111/wrr.12268>
- 37 337 14. Sandy-Hodgetts K, Carville K, Leslie GD. Determining risk factors for surgical wound dehiscence: a  
38 338 literature review. *Int Wound J* 2015;12(3):265-75. doi: 10.1111/iwj.12088
- 39 339 15. Roine E, Bjork IT, Oyen O. Targeting risk factors for impaired wound healing and wound  
40 340 complications after kidney transplantation. *Transplant Proc* 2010;42(7):2542-6. doi:  
41 341 <https://dx.doi.org/10.1016/j.transproceed.2010.05.162>
- 42 342 16. Stephan RN, Munschauer CE, Kumar MS. Surgical wound infection in renal transplantation:  
43 343 outcome data in 102 consecutive patients without perioperative systemic antibiotic  
44 344 coverage. *Arch Surg* 1997;132(12):1315-8; discussion 18-9.
- 45 345 17. Sorensen LT, Hemmingsen U, Kallehave F, et al. Risk factors for tissue and wound complications in  
46 346 gastrointestinal surgery. *Ann Surg* 2005;241(4):654-8.
- 47 347 18. Mahey RG, Smruti; Rajpurohit, Jitesh; Desai, Desai; Suryawanshi, Sachin;. A prospective study of  
48 348 risk factors for abdominal wound dehiscence. *International Surgery Journal* 2017;4(1):24-28.  
49 349 doi: <http://dx.doi.org/10.18203/2349-2902.isj20163983>
- 50 350 19. Deerenberg EB, Harlaar JJ, Steyerberg EW, et al. Small bites versus large bites for closure of  
51 351 abdominal midline incisions (STITCH): a double-blind, multicentre, randomised controlled  
52 352 trial. *Lancet* 2015;386(10000):1254-60. doi: 10.1016/s0140-6736(15)60459-7 [published  
53 353 Online First: 2015/07/21]

1  
2  
3  
4  
5  
6  
7  
8  
9  
10  
11  
12  
13  
14  
15  
16  
17  
18  
19  
20  
21  
22  
23  
24  
25  
26  
27  
28  
29  
30  
31  
32  
33  
34  
35  
36  
37  
38  
39  
40  
41  
42  
43  
44  
45  
46  
47  
48  
49  
50  
51  
52  
53  
54  
55  
56  
57  
58  
59  
60

20. Israelsson LA, Millbourn D. Prevention of Incisional Hernias: How to Close a Midline Incision. *Surg Clin North Am* 2013;93(5):1027-40. doi: <https://doi.org/10.1016/j.suc.2013.06.009>
21. Webster C, Neumayer L, Smout R, et al. Prognostic models of abdominal wound dehiscence after laparotomy. *J Surg Res* 2003;109(2):130-7.
22. Bucknall TE, Cox PJ, Ellis H. Burst abdomen and incisional hernia: a prospective study of 1129 major laparotomies. *Br Med J (Clin Res Ed)* 1982;284(6320):931-3. [published Online First: 1982/03/27]
23. Gislason H, Soreide O, Viste A. Wound complications after major gastrointestinal operations. The surgeon as a risk factor. *Dig Surg* 1999;16(6):512-4. doi: 10.1159/000018778
24. Health NDo. Norsk pasientregister - innhold og kvalitet: Norwegian Directorate of Health; 2018 [Available from: <https://helsedirektoratet.no/norsk-pasientregister-npr/innhold-og-kvalitet> accessed 2018-12-06 2018.
25. eHealth NDo. Helsefaglige kodeverk: Norwegian Directorate of eHealth 2018 [Available from: <https://ehelse.no/standarder-kodeverk-og-referanse katalog/helsefaglige-kodeverk> accessed 2018-06-06 2018.
26. Norwegian Directorate of eHealth. NCMP, NCSP og NCRP: Klassifikasjon av medisinske, kirurgiske og radiologiske prosedyrer Norwegian Directorate of eHealth; 2018 [Available from: <https://finnkode.ehelse.no/#ncmpncsp/0/0/0/-1> accessed 15th May 2018.
27. Hassani S, Lindman AS, Kristoffersen DT, et al. 30-Day Survival Probabilities as a Quality Indicator for Norwegian Hospitals: Data Management and Analysis. *PLoS One* 2015;10(9):e0136547. doi: 10.1371/journal.pone.0136547
28. Quan HD, Sundararajan V, Halfon P, et al. Coding algorithms for defining comorbidities in ICD-9-CM and ICD-10 administrative data. *Med Care* 2005;43(11):1130-39. doi: DOI 10.1097/01.mlr.0000182534.19832.83
29. Quan H, Li B, Couris CM, et al. Updating and validating the Charlson comorbidity index and score for risk adjustment in hospital discharge abstracts using data from 6 countries. *Am J Epidemiol* 2011;173(6):676-82. doi: 10.1093/aje/kwq433
30. (HCUP) HCUP. Beta Clinical Classifications Software (CCS) for ICD-10-CM/PCS: Agency for Healthcare Research and Quality; 2018 [Available from: <https://www.hcup-us.ahrq.gov/toolssoftware/ccs10/ccs10.jsp> accessed 2018-06-06 2018.
31. Firth D. Bias Reduction of Maximum-Likelihood-Estimates. *Biometrika* 1993;80(1):27-38. doi: DOI 10.1093/biomet/80.1.27
32. Kristoffersen DT, Helgeland J, Clench-Aas J, et al. Observed to expected or logistic regression to identify hospitals with high or low 30-day mortality? *PLoS One* 2018;13(4) doi: ARTN e0195248 10.1371/journal.pone.0195248
33. Albert A, Anderson JA. On the Existence of Maximum Likelihood Estimates in Logistic Regression Models. *Biometrika* 1984;71(1):1-10. doi: 10.2307/2336390
34. Guo W, Romano JP. On stepwise control of directional errors under independence and some dependence. *Journal of Statistical Planning and Inference* 2015;163:21-33. doi: <https://doi.org/10.1016/j.jspi.2015.02.009>
35. Chambers JM, Hastie TJ, Eds. Statistical models in S. Pacific Grove: Wadsworth & Brooks/Cole 1992.
36. Paul P, Pennell ML, Lemeshow S. Standardizing the power of the Hosmer-Lemeshow goodness of fit test in large data sets. *Stat Med* 2013;32(1):67-80. doi: 10.1002/sim.5525
37. Kenig J, Richter P, Lasek A, et al. The efficacy of risk scores for predicting abdominal wound dehiscence: a case-controlled validation study. *BMC Surg* 2014;14:65. doi: 10.1186/1471-2482-14-65
38. Walming S, Angenete E, Block M, et al. Retrospective review of risk factors for surgical wound dehiscence and incisional hernia. *BMC Surg* 2017;17(1):19. doi: 10.1186/s12893-017-0207-0
39. Kitazawa T, Matsumoto K, Fujita S, et al. Perioperative patient safety indicators and hospital surgical volumes. *BMC Res Notes* 2014;7:117. doi: 10.1186/1756-0500-7-117 [published Online First: 2014/03/04]

- 1  
2  
3 406 40. Hernandez-Boussard T, Downey JR, McDonald K, et al. Relationship between Patient Safety and  
4 407 Hospital Surgical Volume. *Health Serv Res* 2012;47(2):756-69. doi: doi:10.1111/j.1475-  
5 408 6773.2011.01310.x  
6 409 41. Bakken IJ, Gystad SO, Christensen OO, et al. Comparison of data from the Norwegian Patient  
7 410 Register and the Cancer Registry of Norway. *Tidsskr Nor Laegeforen* 2012;132(11):1336-40.  
8 411 doi: 10.4045/tidsskr.11.1099 [published Online First: 2012/06/22]  
9 412 42. Hoiberg MP, Gram J, Hermann P, et al. The incidence of hip fractures in Norway -accuracy of the  
10 413 national Norwegian patient registry. *BMC Musculoskelet Disord* 2014;15:372. doi:  
11 414 10.1186/1471-2474-15-372 [published Online First: 2014/11/15]  
12 415 43. Oie LR, Madsbu MA, Giannadakis C, et al. Validation of intracranial hemorrhage in the Norwegian  
13 416 Patient Registry. *Brain and behavior* 2018;8(2):e00900. doi: 10.1002/brb3.900 [published  
14 417 Online First: 2018/02/28]  
15 418 44. Varndal T, Bakken IJ, Janszky I, et al. Comparison of the validity of stroke diagnoses in a medical  
16 419 quality register and an administrative health register. *Scandinavian journal of public health*  
17 420 2016;44(2):143-9. doi: 10.1177/1403494815621641 [published Online First: 2015/12/15]  
18 421 45. Health NloP. Public Health report: Norwegian Institute of Public Health; 2018 [Available from:  
19 422 <https://www.fhi.no/en/op/hin/> accessed 2018-06-06 2018.  
20 423 46. Cevasco M, Borzecki AM, McClusky DA, 3rd, et al. Positive predictive value of the AHRQ Patient  
21 424 Safety Indicator "postoperative wound dehiscence". *J Am Coll Surg* 2011;212(6):962-7. doi:  
22 425 <https://dx.doi.org/10.1016/j.jamcollsurg.2011.01.053>  
23 426 47. Borzecki AM, Cevasco M, Mull H, et al. Improving the identification of postoperative wound  
24 427 dehiscence missed by the Patient Safety Indicator algorithm. *Am J Surg* 2013;205(6):674-80.  
25 428 doi: <https://dx.doi.org/10.1016/j.amjsurg.2012.07.040>  
26 429 48. Berríos-Torres SI, Umscheid CA, Bratzler DW, et al. Centers for disease control and prevention  
27 430 guideline for the prevention of surgical site infection, 2017. *JAMA Surg* 2017;152(8):784-91.  
28 431 doi: 10.1001/jamasurg.2017.0904  
29  
30  
31  
32  
33  
34 432  
35  
36  
37  
38  
39  
40  
41  
42  
43  
44  
45  
46  
47  
48  
49  
50  
51  
52  
53  
54  
55  
56  
57  
58  
59  
60

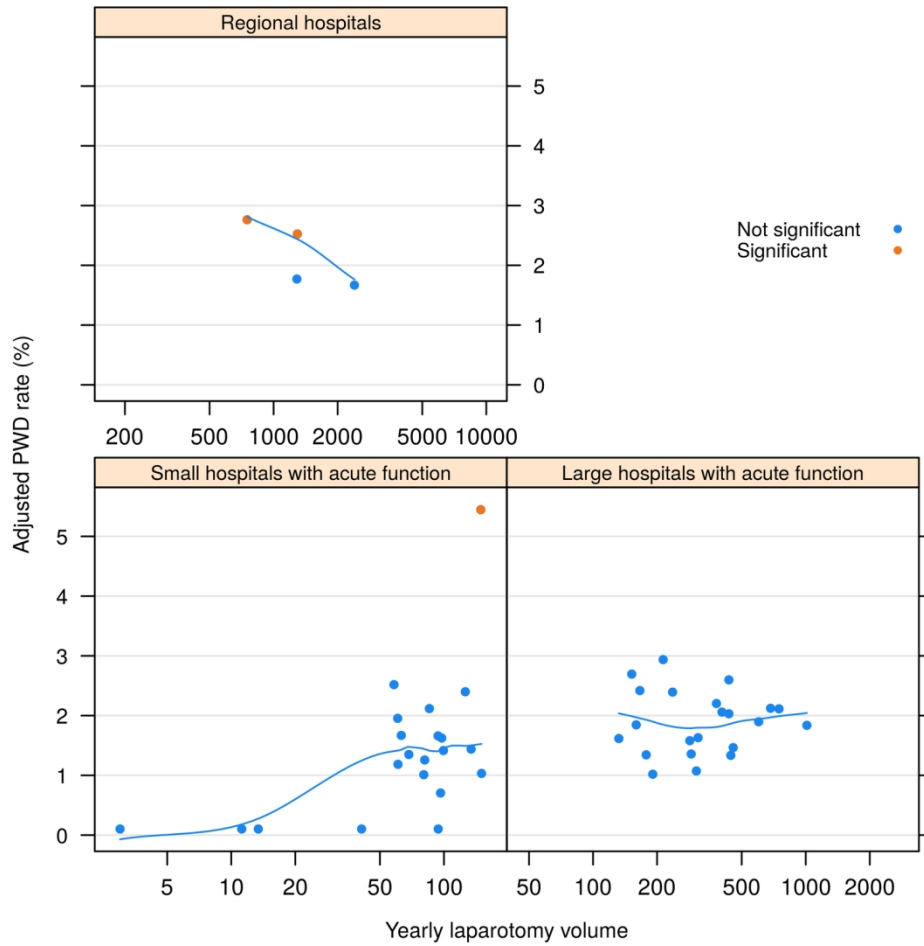

Figure 1. Risk adjusted PWD rates versus yearly laparotomy volume, by hospital type. Trend curve is obtained by smoothing the scatterplot. Significance testing is adjusted for multiple comparisons

149x149mm (300 x 300 DPI)

## Online supplement

*Table 1. Hospital types*

| Hospital type                       | Number |
|-------------------------------------|--------|
| Small hospitals with acute function | 21     |
| Large hospitals with acute function | 22     |
| Regional hospitals                  | 4      |

*Table 2. Laparotomy cases after operation type (primary episode)*

| Operation type                             | Frequency, n (%) |
|--------------------------------------------|------------------|
| Gastrointestinal tract                     | 30 404 (38.9)    |
| More than one type of surgery <sup>a</sup> | 14 051 (18.0)    |
| Female genital organs                      | 10 720 (13.7)    |
| Other urinary and male genital organs      | 6 536 (8.4)      |
| Peripheral vascular surgery                | 4 628 (5.9)      |
| Biliary tract                              | 2 739 (3.5)      |
| Other digestive system                     | 2 226 (2.9)      |
| Kidney                                     | 2 152 (2.8)      |
| Exploratory laparotomy                     | 2 061 (2.6)      |
| Liver                                      | 1 122 (1.4)      |
| Pancreas                                   | 775 (1.0)        |
| Hernia (diaphragmal)                       | 274 (0.4)        |
| Spleen                                     | 248 (0.3)        |
| Thoracoabdominal aorta                     | 150 (0.2)        |

<sup>a</sup>Not counting exploratory laparotomy

*Table 3. Effect of hospital region, after risk adjustment. Odds ratio standardized to have geometric mean one.*

| Hospital region             | Adjusted odds ratio (95% confidence interval) |
|-----------------------------|-----------------------------------------------|
| South-Eastern Norway Region | 0.85 (0.78 - 0.92)                            |
| Central Norway Region       | 0.99 (0.89 - 1.10)                            |
| Western Norway Region       | 1.06 (0.96 - 1.17)                            |
| Northern Norway Region      | 1.13 (1.001 - 1.27)                           |



## Diagnoses

Table 4. ICD-10 diagnosis codes contained in MDC 14 (Pregnancy, childbirth, and puerperium)

| Code  | Title                                                                                            |
|-------|--------------------------------------------------------------------------------------------------|
| A34   | Obstetrical tetanus                                                                              |
| F53.0 | Mild mental and behavioural disorders associated with the puerperium, not elsewhere classified   |
| F53.1 | Severe mental and behavioural disorders associated with the puerperium, not elsewhere classified |
| F53.8 | Other mental and behavioural disorders associated with the puerperium, not elsewhere classified  |
| F53.9 | Puerperal mental disorder, unspecified                                                           |
| Oxx.x | Pregnancy, childbirth and puerperium                                                             |
| Z32.0 | Pregnancy, not (yet) confirmed                                                                   |
| Z32.1 | Pregnancy confirmed                                                                              |
| Z33   | Pregnant state, incidental                                                                       |
| Z34.0 | Supervision of normal first pregnancy                                                            |
| Z34.8 | Supervision of other normal pregnancy                                                            |
| Z34.9 | Supervision of normal pregnancy, unspecified                                                     |
| Z35.0 | Supervision of pregnancy with history of infertility                                             |
| Z35.1 | Supervision of pregnancy with history of abortive outcome                                        |
| Z35.2 | Supervision of pregnancy with other poor reproductive or obstetric history                       |
| Z35.3 | Supervision of pregnancy with history of insufficient antenatal care                             |
| Z35.4 | Supervision of pregnancy with grand multiparity                                                  |
| Z35.5 | Supervision of elderly primigravida                                                              |
| Z35.6 | Supervision of very young primigravida                                                           |
| Z35.8 | Supervision of other high-risk pregnancies                                                       |
| Z35.9 | Supervision of high-risk pregnancy, unspecified                                                  |
| Z36.0 | Antenatal screening for chromosomal anomalies                                                    |
| Z36.1 | Antenatal screening for raised alpha-fetoprotein level                                           |
| Z36.2 | Other antenatal screening based on amniocentesis                                                 |
| Z36.3 | Antenatal screening for malformations using ultrasound and other physical methods                |
| Z36.4 | Antenatal screening for fetal growth retardation using ultrasound and other physical methods     |
| Z36.5 | Antenatal screening for isoimmunization                                                          |
| Z36.8 | Other antenatal screening                                                                        |
| Z36.9 | Antenatal screening, unspecified                                                                 |
| Z37.0 | Single live birth                                                                                |
| Z37.1 | Single stillbirth                                                                                |
| Z37.2 | Twins, both liveborn                                                                             |
| Z37.3 | Twins, one liveborn and one stillborn                                                            |
| Z37.4 | Twins, both stillborn                                                                            |
| Z37.5 | Other multiple births, all liveborn                                                              |
| Z37.6 | Other multiple births, some liveborn                                                             |
| Z37.7 | Other multiple births, all stillborn                                                             |
| Z37.9 | Outcome of delivery, unspecified                                                                 |
| Z39.0 | Care and examination immediately after delivery                                                  |
| Z39.1 | Care and examination of lactating mother                                                         |
| Z39.2 | Routine postpartum follow-up                                                                     |
| Z64.0 | Problems related to unwanted pregnancy                                                           |

*Postoperative wound dehiscence after laparotomy: a useful health care quality indicator? A cohort study based on Norwegian hospital administrative data*

For peer review only - <http://bmjopen.bmj.com/site/about/guidelines.xhtml>

Table 5. ICD-10 diagnosis codes for immunocompromised state

| Code  | Title                                                                                             |
|-------|---------------------------------------------------------------------------------------------------|
| B20.0 | HIV disease resulting in mycobacterial infection                                                  |
| B20.1 | HIV disease resulting in other bacterial infections                                               |
| B20.2 | HIV disease resulting in cytomegaloviral disease                                                  |
| B20.3 | HIV disease resulting in other viral infections                                                   |
| B20.4 | HIV disease resulting in candidiasis                                                              |
| B20.5 | HIV disease resulting in other mycoses                                                            |
| B20.6 | HIV disease resulting in Pneumocystis carinii pneumonia                                           |
| B20.7 | HIV disease resulting in multiple infections                                                      |
| B20.8 | HIV disease resulting in other infectious and parasitic diseases                                  |
| B20.9 | HIV disease resulting in unspecified infectious or parasitic disease                              |
| B21.0 | HIV disease resulting in Kaposi's sarcoma                                                         |
| B21.1 | HIV disease resulting in Burkitt's lymphoma                                                       |
| B21.2 | HIV disease resulting in other types of non-Hodgkin's lymphoma                                    |
| B21.3 | HIV disease resulting in other malignant neoplasms of lymphoid, haematopoietic and related tissue |
| B21.7 | HIV disease resulting in multiple malignant neoplasms                                             |
| B21.8 | HIV disease resulting in other malignant neoplasms                                                |
| B21.9 | HIV disease resulting in unspecified malignant neoplasm                                           |
| B22.0 | HIV disease resulting in encephalopathy                                                           |
| B22.1 | HIV disease resulting in lymphoid interstitial pneumonitis                                        |
| B22.2 | HIV disease resulting in wasting syndrome                                                         |
| B22.7 | HIV disease resulting in multiple diseases classified elsewhere                                   |
| B23.1 | HIV disease resulting in (persistent) generalized lymphadenopathy                                 |
| B23.2 | HIV disease resulting in haematological and immunological abnormalities, not elsewhere classified |
| B23.8 | HIV disease resulting in other specified conditions                                               |
| B24   | Unspecified human immunodeficiency virus [HIV] disease                                            |
| B59   | Pneumocystosis                                                                                    |
| D47.1 | Chronic myeloproliferative disease                                                                |
| D70   | Agranulocytosis                                                                                   |
| D71   | Functional disorders of polymorphonuclear neutrophils                                             |
| D72.0 | Genetic anomalies of leukocytes                                                                   |
| D80.0 | Hereditary hypogammaglobulinaemia                                                                 |
| D80.1 | Nonfamilial hypogammaglobulinaemia                                                                |
| D80.2 | Selective deficiency of immunoglobulin A [IgA]                                                    |
| D80.3 | Selective deficiency of immunoglobulin G [IgG] subclasses                                         |
| D80.4 | Selective deficiency of immunoglobulin M [IgM]                                                    |
| D80.5 | Immunodeficiency with increased immunoglobulin M [IgM]                                            |
| D80.6 | Antibody deficiency with near-normal immunoglobulins or with hyperimmunoglobulinaemia             |
| D80.7 | Transient hypogammaglobulinaemia of infancy                                                       |
| D80.8 | Other immunodeficiencies with predominantly antibody defects                                      |
| D80.9 | Immunodeficiency with predominantly antibody defects, unspecified                                 |
| D81.0 | Severe combined immunodeficiency [SCID] with reticular dysgenesis                                 |
| D81.1 | Severe combined immunodeficiency [SCID] with low T- and B-cell numbers                            |
| D81.2 | Severe combined immunodeficiency [SCID] with low or normal B-cell numbers                         |
| D81.3 | Adenosine deaminase [ADA] deficiency                                                              |
| D81.4 | Nezelof's syndrome                                                                                |
| D81.5 | Purine nucleoside phosphorylase [PNP] deficiency                                                  |
| D81.6 | Major histocompatibility complex class I deficiency                                               |
| D81.7 | Major histocompatibility complex class II deficiency                                              |
| D81.8 | Other combined immunodeficiencies                                                                 |
| D81.9 | Combined immunodeficiency, unspecified                                                            |
| D82.0 | Wiskott-Aldrich syndrome                                                                          |
| D82.1 | Di George's syndrome                                                                              |

Postoperative wound dehiscence after laparotomy: a useful health care quality indicator? A cohort study based on Norwegian hospital administrative data

| Code  | Title                                                                                          |
|-------|------------------------------------------------------------------------------------------------|
| D82.2 | Immunodeficiency with short-limbed stature                                                     |
| D82.3 | Immunodeficiency following hereditary defective response to Epstein-Barr virus                 |
| D82.4 | Hyperimmunoglobulin E [IgE] syndrome                                                           |
| D82.8 | Immunodeficiency associated with other specified major defects                                 |
| D82.9 | Immunodeficiency associated with major defect, unspecified                                     |
| D83.0 | Common variable immunodeficiency with predominant abnormalities of B-cell numbers and function |
| D83.1 | Common variable immunodeficiency with predominant immunoregulatory T-cell disorders            |
| D83.2 | Common variable immunodeficiency with autoantibodies to B- or T-cells                          |
| D83.8 | Other common variable immunodeficiencies                                                       |
| D83.9 | Common variable immunodeficiency, unspecified                                                  |
| D84.0 | Lymphocyte function antigen-1 [LFA-1] defect                                                   |
| D84.1 | Defects in the complement system                                                               |
| D84.8 | Other specified immunodeficiencies                                                             |
| D84.9 | Immunodeficiency, unspecified                                                                  |
| D89.8 | Other specified disorders involving the immune mechanism, not elsewhere classified             |
| D89.9 | Disorder involving the immune mechanism, unspecified                                           |
| E40   | Kwashiorkor                                                                                    |
| E41   | Nutritional marasmus                                                                           |
| E42   | Marasmic kwashiorkor                                                                           |
| E43   | Unspecified severe protein-energy malnutrition                                                 |
| I12.0 | Hypertensive renal disease with renal failure                                                  |
| I13.1 | Hypertensive heart and renal disease with renal failure                                        |
| I13.2 | Hypertensive heart and renal disease with both (congestive) heart failure and renal failure    |
| K91.2 | Postsurgical malabsorption, not elsewhere classified                                           |
| N18.0 | End-stage renal disease                                                                        |
| N18.5 | Chronic kidney disease, stage 5                                                                |
| N18.8 | Other chronic renal failure                                                                    |
| T86.0 | Bone-marrow transplant rejection                                                               |
| T86.1 | Kidney transplant failure and rejection                                                        |
| T86.2 | Heart transplant failure and rejection                                                         |
| T86.3 | Heart-lung transplant failure and rejection                                                    |
| T86.4 | Liver transplant failure and rejection                                                         |
| T86.8 | Failure and rejection of other transplanted organs and tissues                                 |
| T86.9 | Failure and rejection of unspecified transplanted organ and tissue                             |
| Y83.0 | Surgical Operation with transplant of whole organ or tissue                                    |
| Z49.0 | Preparatory care for dialysis                                                                  |
| Z49.1 | Extracorporeal dialysis                                                                        |
| Z49.2 | Other dialysis                                                                                 |
| Z94.0 | Kidney transplant status                                                                       |
| Z94.1 | Heart transplant status                                                                        |
| Z94.2 | Lung transplant status                                                                         |
| Z94.3 | Heart and lungs transplant status                                                              |
| Z94.4 | Liver transplant status                                                                        |
| Z94.8 | Other transplanted organ and tissue status                                                     |
| Z94.9 | Transplanted organ and tissue status, unspecified                                              |

*Postoperative wound dehiscence after laparotomy: a useful health care quality indicator? A cohort study based on Norwegian hospital administrative data*

For peer review only - <http://bmjopen.bmj.com/site/about/guidelines.xhtml>

## Operations

*Procedure codes for laparotomy and operation types.* Laparotomy codes are the total of codes in tables 6-19. Note that a last code digit of 0, 3 or 6 signifies an open or other non-endoscopic operation or procedure, except for peripheral vascular surgery.

*Table 6. NCSP-N codes for reclosure procedures*

| Code  | Title                                                                            |
|-------|----------------------------------------------------------------------------------|
| JWA00 | Repair of wound dehiscence in gastroenterological surgery                        |
| KWA00 | Repair of wound dehiscence in urological surgery                                 |
| LWA00 | Repair of wound dehiscence in gynaecological surgery                             |
| PWA00 | Repair of wound dehiscence in surgery of peripheral vessels and lymphatic system |

*Table 7. NCSP-N code for exploratory laparotomy and opening of abdominal cavity*

| Code  | Title                      |
|-------|----------------------------|
| JAA00 | Incision of abdominal wall |
| JAH00 | Laparotomy                 |
| JAH20 | Staging laparotomy         |
| JAH30 | Laparostomy                |
| JAH33 | Opening of laparostomy     |
| JAH40 | Thoracolumbarotomy         |

*Table 8. NCSP-N codes for diaphragmal hernia repair*

| Code  | Title                                     |
|-------|-------------------------------------------|
| JBB00 | Repair of paraoesophageal hernia          |
| JBB10 | Repair of congenital diaphragmatic hernia |
| JBB96 | Repair of other diaphragmatic hernia      |
| JBC00 | Gastro-oesophageal antireflux operation   |

*Table 9. NCSP-N codes for repair of thoracoabdominal aorta*

| Code  | Title                                                                   |
|-------|-------------------------------------------------------------------------|
| FCD00 | Suture of thoracoabdominal aorta                                        |
| FCD10 | Reinforcement of thoracoabdominal aorta using suture                    |
| FCD30 | Repair of thoracoabdominal aorta using patch                            |
| FCD40 | Partial resection and suture of thoracoabdominal aorta                  |
| FCD50 | Resection and reconstruction of thoracoabdominal aorta using tube graft |
| FCD60 | Resection of thoracoabdominal aorta and reimplantation of branches      |
| FCD70 | Bypass of thoracoabdominal aorta using tube graft                       |
| FCD80 | Removal of foreign body from thoracoabdominal aorta                     |
| FCD96 | Other repair of thoracoabdominal aorta                                  |

*Postoperative wound dehiscence after laparotomy: a useful health care quality indicator? A cohort study based on Norwegian hospital administrative data*

Table 10. NCSP-N codes for procedures on the gastrointestinal tract: oesophagus, stomach and intestines

| Code  | Title                                                                               |
|-------|-------------------------------------------------------------------------------------|
| JCB00 | Oesophagostomy                                                                      |
| JCC00 | Transhiatal partial oesophagectomy without interposition                            |
| JCC10 | Transthoracic partial oesophagectomy without interposition                          |
| JCC20 | Transhiatal partial oesophagectomy with interposition of intestine                  |
| JCC30 | Transthoracic partial oesophagectomy with interposition of intestine                |
| JCC96 | Other partial oesophagectomy                                                        |
| JCD00 | Subcutaneous anastomosis of oesophagus without interposition                        |
| JCD03 | Subcutaneous anastomosis of oesophagus with interposition of intestine              |
| JCD10 | Intrathoracic anastomosis of oesophagus without interposition                       |
| JCD13 | Intrathoracic oesophageal anastomosis with interposition of intestine               |
| JCD20 | Transsection of oesophagus                                                          |
| JCD96 | Other anastomosis of oesophagus without resection                                   |
| JCE00 | Suture of oesophagus                                                                |
| JCE10 | Plastic repair of stenosis of cardia                                                |
| JCE20 | Cardiomyotomy                                                                       |
| JCE30 | Repair of oesophageal atresia or congenital tracheo-oesophageal fistula             |
| JCE33 | Closure of acquired tracheo-oesophageal or broncho-oesophageal fistula              |
| JCE40 | Reconstruction of oesophagus using flap                                             |
| JCE50 | Reconstruction of oesophagus using free microvascular graft of intestine            |
| JCE96 | Other reconstruction of oesophagus                                                  |
| JCF00 | Insertion of oesophageal stent                                                      |
| JCW96 | Other operation on oesophagus                                                       |
| JDA00 | Gastrotomy                                                                          |
| JDA60 | Closure of perforated ulcer of stomach                                              |
| JDA63 | Local excision of lesion of stomach                                                 |
| JDB00 | Gastrostomy                                                                         |
| JDB10 | Percutaneous gastrostomy                                                            |
| JDC00 | Partial gastrectomy and gastroduodenostomy                                          |
| JDC10 | Partial gastrectomy and gastrojejunostomy                                           |
| JDC20 | Partial gastrectomy and Roux-en-Y reconstruction                                    |
| JDC30 | Partial gastrectomy with interposition of jejunum                                   |
| JDC40 | Partial gastrectomy and oesophagogastrostomy                                        |
| JDC96 | Partial gastrectomy with other reconstruction                                       |
| JDD00 | Total gastrectomy and Roux-en-Y oesophagojejunostomy                                |
| JDD96 | Total gastrectomy with other reconstruction                                         |
| JDE00 | Gastrojejunostomy                                                                   |
| JDE10 | Conversion of gastrojejunostomy to Roux-en-Y anastomosis                            |
| JDE20 | Conversion of gastrojejunostomy to gastroduodenostomy with interposition of jejunum |
| JDE96 | Other anastomosis of stomach without concurrent gastrectomy                         |
| JDF00 | Gastroplasty                                                                        |

Postoperative wound dehiscence after laparotomy: a useful health care quality indicator? A cohort study based on Norwegian hospital administrative data

For peer review only - <http://bmjopen.bmj.com/site/about/guidelines.xhtml>

| Code  | Title                                                                        |
|-------|------------------------------------------------------------------------------|
| JDF10 | Gastric bypass                                                               |
| JDF20 | Gastric banding                                                              |
| JDF96 | Other bariatric operation on stomach                                         |
| JDG00 | Truncal vagotomy                                                             |
| JDG10 | Proximal gastric vagotomy                                                    |
| JDG96 | Other vagotomy                                                               |
| JDH00 | Duodenotomy                                                                  |
| JDH40 | Duodenostomy on duodenal bulb                                                |
| JDH50 | Local excision of lesion of duodenal bulb                                    |
| JDH60 | Pyloromyotomy                                                                |
| JDH63 | Pyloroplasty                                                                 |
| JDH70 | Closure of perforated ulcer of duodenum                                      |
| JDW96 | Other operation on stomach or duodenum                                       |
| JEA00 | Appendectomy                                                                 |
| JEA10 | Appendectomy with drainage                                                   |
| JEW96 | Other operation on appendix                                                  |
| JFA00 | Enterotomy                                                                   |
| JFA10 | Colotomy                                                                     |
| JFA16 | Biopsy of wall of colon without colotomy                                     |
| JFA60 | Stricturoplasty in small intestine                                           |
| JFA63 | Stricturoplasty in colon                                                     |
| JFA70 | Suture of small intestine                                                    |
| JFA73 | Excision of lesion of small intestine                                        |
| JFA76 | Closure of fistula of small intestine                                        |
| JFA80 | Suture of colon                                                              |
| JFA83 | Excision of lesion of colon                                                  |
| JFA86 | Closure of fistula of colon                                                  |
| JFA96 | Other local operation on intestine                                           |
| JFB00 | Partial resection of small intestine                                         |
| JFB10 | Reversal of segment of small intestine                                       |
| JFB13 | Plastic repair of small intestine with lengthening                           |
| JFB20 | Ileocaecal resection                                                         |
| JFB30 | Right hemicolectomy                                                          |
| JFB33 | Other resection comprising small intestine and colon                         |
| JFB40 | Resection of transverse colon                                                |
| JFB43 | Left hemicolectomy                                                           |
| JFB46 | Resection of sigmoid colon                                                   |
| JFB50 | Other resection of colon                                                     |
| JFB53 | Resection of sigmoid colon sigmoideum with partial resection of rectum       |
| JFB60 | Resection of sigmoid colon with end colostomy                                |
| JFB63 | Other resection of colon with proximal colostomy and closure of distal stump |
| JFB96 | Other partial excision of intestine                                          |
| JFC00 | Entero-enterostomy                                                           |
| JFC10 | Ileotransversostomy                                                          |

*Postoperative wound dehiscence after laparotomy: a useful health care quality indicator? A cohort study based on Norwegian hospital administrative data*

For peer review only - <http://bmjopen.bmj.com/site/about/guidelines.xhtml>

| Code  | Title                                                                    |
|-------|--------------------------------------------------------------------------|
| JFC20 | Other enterocolostomy                                                    |
| JFC30 | Colo-colostomy                                                           |
| JFC40 | Ileorectostomy                                                           |
| JFC50 | Colorectostomy                                                           |
| JFD00 | Jejunioleal bypass                                                       |
| JFD03 | Duodenoileal bypass with biliopancreatic diversion                       |
| JFD10 | Revision of jejunioleal bypass                                           |
| JFD13 | Revision of duodenoileal bypass                                          |
| JFD20 | Restoration of continuity after jejunioleal bypass                       |
| JFD23 | Restoration of continuity after duodenoileal bypass                      |
| JFD96 | Other intestinal bypass operation                                        |
| JFE00 | Transplantation of small intestine                                       |
| JFE96 | Other operation relating to transplantation of small intestine           |
| JFF00 | Catheter enterostomy                                                     |
| JFF10 | Loop enterostomy                                                         |
| JFF13 | Terminal enterostomy                                                     |
| JFF16 | Conversion of ileoanal anastomosis to ileostomy                          |
| JFF20 | Caecostomy                                                               |
| JFF23 | Transversostomy                                                          |
| JFF26 | Sigmoidostomy                                                            |
| JFF30 | Other colostomy                                                          |
| JFF40 | Appendicostomy                                                           |
| JFF50 | Exteriorisation of loop of colon without opening                         |
| JFF60 | Opening of exteriorised loop of colon                                    |
| JFF96 | Other exteriorisation of intestine or creation of intestinal stoma       |
| JFG00 | Closure of loop enterostomy without resection                            |
| JFG10 | Closure of loop colostomy without resection                              |
| JFG20 | Closure of enterostomy with resection of exteriorised loop               |
| JFG23 | Closure of terminal enterostomy with anastomosis to small intestine      |
| JFG26 | Closure of terminal enterostomy with anastomosis to colon                |
| JFG30 | Closure of colostomy with resection of exteriorised loop                 |
| JFG33 | Closure of terminal colostomy with anastomosis to colon                  |
| JFG36 | Closure of terminal colostomy with anastomosis to rectum                 |
| JFG40 | Revision of enterostomy or colostomy without laparotomy                  |
| JFG50 | Laparotomy with revision of enterostomy or colostomy                     |
| JFG53 | Revision of ileal pelvic pouch                                           |
| JFG56 | Revision of colonic pelvic pouch                                         |
| JFG60 | Conversion of conventional ileostomy to continent ileostomy              |
| JFG70 | Conversion of continent ileostomy to conventional ileostomy              |
| JFG73 | Excision of ileal pelvic pouch                                           |
| JFG76 | Excision of colonic pelvic pouch with colorectal or coloanal anastomosis |
| JFG80 | Excision of ileal pouch with construction of new continent ileostomy     |
| JFG83 | Excision of colonic pelvic pouch and construction of new pouch           |
| JFG86 | Excision of ileal pelvic pouch and construction of new pouch             |

*Postoperative wound dehiscence after laparotomy: a useful health care quality indicator? A cohort study based on Norwegian hospital administrative data*

For peer review only - <http://bmjopen.bmj.com/site/about/guidelines.xhtml>

| Code  | Title                                                                                |
|-------|--------------------------------------------------------------------------------------|
| JFG96 | Other operation on intestinal stoma or pouch                                         |
| JFH00 | Total colectomy and ileorectal anastomosis                                           |
| JFH10 | Total colectomy and ileostomy                                                        |
| JFH20 | Proctocolectomy and ileostomy                                                        |
| JFH30 | Total colectomy, mucosal proctectomy and ileoanal anastomosis without ileostomy      |
| JFH33 | Total colectomy, mucosal proctectomy, ileoanal anastomosis and ileostomy             |
| JFH40 | Proctocolectomy and continent ileostomy                                              |
| JFH96 | Other total colectomy                                                                |
| JFJ00 | Coecopexy                                                                            |
| JFJ96 | Other enteropexy or colopexy                                                         |
| JFK00 | Division of adhesive band in intestinal obstruction                                  |
| JFK10 | Freeing of adhesions in intestinal obstruction                                       |
| JFK20 | Freeing of adhesions and plication of small intestine                                |
| JFK96 | Other operation on adhesions in intestinal obstruction                               |
| JFL00 | Open reduction of intussusception of intestine                                       |
| JFL10 | Laparotomy and manipulation of obstructed intestine                                  |
| JFL20 | Laparotomy and manipulation of impacted material                                     |
| JFL96 | Other operation for intestinal obstruction without resection or freeing of adhesions |
| JFW96 | Other operation on intestine                                                         |
| JGA00 | Proctotomy                                                                           |
| JGA60 | Suture of rectum                                                                     |
| JGA70 | Proctotomy and excision of lesion of rectum                                          |
| JGA96 | Other proctotomy or local operation on rectum                                        |
| JGB00 | Partial proctectomy and colorectal or coloanal anastomosis                           |
| JGB03 | Partial proctectomy with partial excision of mesorectum                              |
| JGB06 | Total mesorectal excision                                                            |
| JGB10 | Partial proctectomy and end colostomy                                                |
| JGB20 | Partial rectosigmoidectomy and abdominoperineal pull-through anastomosis             |
| JGB30 | Abdominoperineal excision of rectum                                                  |
| JGB33 | Abdominoperineal excision of rectum and intersphincter resection                     |
| JGB36 | Wide excision of rectum                                                              |
| JGB40 | Excision of rectum and end ileostomy                                                 |
| JGB50 | Mucosal proctectomy and ileoanal anastomosis                                         |
| JGB60 | Excision of rectum and ileoanal anastomosis                                          |
| JGB96 | Other proctectomy or excision of rectum                                              |
| JGC00 | Rectopexy                                                                            |
| JGC30 | Excision and suture of rectal mucosa with imbrication of muscular layer              |
| JGC96 | Other reconstructive operation on rectum                                             |
| JGW96 | Other operation on rectum                                                            |



Table 11. NCSP-N codes for procedures on the liver

| Code  | Title                                                        |
|-------|--------------------------------------------------------------|
| JJA00 | Exploration of liver                                         |
| JJA10 | Hepatotomy                                                   |
| JJA20 | Open biopsy of liver                                         |
| JJA23 | Open needle biopsy of liver                                  |
| JJA30 | Fenestration of cyst of liver                                |
| JJA40 | Excision of lesion of liver                                  |
| JJA43 | Destruction of lesion of liver                               |
| JJA50 | Suture of liver                                              |
| JJA96 | Other local operation on liver                               |
| JJB00 | Wedge resection of liver                                     |
| JJB10 | Atypical resection of liver                                  |
| JJB20 | Excision of single segment of liver                          |
| JJB30 | Excision of two segments of liver                            |
| JJB40 | Excision of segments II, III and IV of liver                 |
| JJB50 | Excision of segments V, VI, VII and VIII of liver            |
| JJB53 | Excision of segments IV,V, VI, VII and VIII of liver         |
| JJB60 | Other excision of three or more segments of liver            |
| JJB96 | Other resection of liver                                     |
| JJC00 | Allogenic transplantation of liver                           |
| JJC10 | Allogenic partial transplantation of liver                   |
| JJC20 | Allogenic partial transplantation of liver from living donor |
| JJC30 | Xenogenic transplantation of liver                           |
| JJC40 | Xenogenic partial transplantation of liver                   |
| JJC50 | Resection of transplanted liver                              |
| JJC60 | Total excision of transplanted liver                         |
| JJC96 | Other transplantation of liver or related operation          |
| JJW96 | Other operation on liver                                     |

Table 12. NCSP-N codes for procedures on biliary tract

| Code  | Title                                              |
|-------|----------------------------------------------------|
| JKA00 | Cholecystotomy                                     |
| JKA10 | Cholecystostomy                                    |
| JKA20 | Cholecystectomy                                    |
| JKA96 | Other operation on gallbladder                     |
| JKB00 | Incision of bile duct                              |
| JKB20 | Intraoperative cholangioscopy                      |
| JKB30 | Percutaneous transhepatic biliary drainage         |
| JKB40 | Suture of bile duct                                |
| JKB96 | Other incision or related operation on bile duct   |
| JKC00 | Incision of bile duct and local excision of lesion |
| JKC10 | Partial excision and anastomosis of bile duct      |

*Postoperative wound dehiscence after laparotomy: a useful health care quality indicator? A cohort study based on Norwegian hospital administrative data*

| Code  | Title                                                                            |
|-------|----------------------------------------------------------------------------------|
| JKC20 | Partial excision of bile duct and anastomosis to duodenum                        |
| JKC30 | Partial excision of bile duct and anastomosis to jejunum                         |
| JKC40 | Partial excision of right or left hepatic duct and anastomosis to jejunum        |
| JKC50 | Excision of papilla of Vater and anastomosis of bile duct to duodenum or jejunum |
| JKC96 | Other excision of bile duct                                                      |
| JKD00 | Anastomosis of gallbladder to jejunum                                            |
| JKD10 | Anastomosis of bile duct to duodenum                                             |
| JKD20 | Anastomosis of bile duct to jejunum                                              |
| JKD30 | Extrahepatic anastomosis of right or left hepatic duct to jejunum                |
| JKD40 | Anastomosis of intrahepatic bile duct to jejunum                                 |
| JKD50 | Hepatoportoenterostomy                                                           |
| JKD96 | Other biliodigestive anastomosis without excision                                |
| JKE00 | Transduodenal papillotomy                                                        |
| JKE06 | Transduodenal sphincteroplasty                                                   |
| JKE96 | Other transduodenal open operation on bile duct or ampulla of Vater              |
| JKF00 | Excision of cystic duct                                                          |
| JKF96 | Other secondary operation on biliary tract                                       |
| JKW96 | Other operation on biliary tract                                                 |

Table 13. NCSP-N codes for procedures on the pancreas

| Code  | Title                                                                   |
|-------|-------------------------------------------------------------------------|
| JLA00 | Exploration of pancreas                                                 |
| JLA10 | Biopsy of pancreas                                                      |
| JLB00 | Incision of pancreas                                                    |
| JLB10 | Pancreaticolithotomy                                                    |
| JLB96 | Other incision, drainage or dilatation of pancreas                      |
| JLC00 | Excision of lesion of pancreas                                          |
| JLC10 | Distal pancreatectomy                                                   |
| JLC20 | Total pancreatectomy                                                    |
| JLC30 | Pancreatoduodenectomy                                                   |
| JLC40 | Total pancreatoduodenectomy                                             |
| JLC50 | Atypical pancreatectomy                                                 |
| JLC96 | Other pancreatectomy                                                    |
| JLD00 | Pancreaticojejunostomy                                                  |
| JLD10 | Anastomosis of pancreatic pseudocyst to stomach                         |
| JLD20 | Anastomosis of pancreatic pseudocyst to jejunum                         |
| JLE00 | Allogenic total transplantation of pancreas with pancreaticocystostomy  |
| JLE03 | Allogenic total transplantation of pancreas with pancreaticoenterostomy |
| JLE10 | Allogenic segmental transplantation of pancreas                         |
| JLE16 | Allogenic segmental transplantation of pancreas from living donor       |
| JLE20 | Allogenic islet cell transplantation                                    |
| JLE30 | Xenogenic islet cell transplantation                                    |

*Postoperative wound dehiscence after laparotomy: a useful health care quality indicator? A cohort study based on Norwegian hospital administrative data*

| Code  | Title                                                         |
|-------|---------------------------------------------------------------|
| JLE40 | Total excision of transplanted pancreas                       |
| JLE50 | Occlusion of duct of transplanted pancreas                    |
| JLE56 | Conversion of pancreaticocystostomy to pancreaticoenterostomy |
| JLE96 | Other transplantation of pancreas or related operation        |
| JLW96 | Other operation on pancreas                                   |

Table 14. NCSP-N codes for procedures on the spleen

| Code  | Title                            |
|-------|----------------------------------|
| JMA00 | Partial splenectomy              |
| JMA10 | Transabdominal total splenectomy |
| JMA20 | Transthoracic total splenectomy  |
| JMB00 | Biopsy of spleen                 |
| JMB10 | Repair of spleen                 |
| JMW96 | Other operation on spleen        |

Table 15. NCSP-N codes for other digestive system procedures

| Code  | Title                                                                      |
|-------|----------------------------------------------------------------------------|
| JAA10 | Excision of lesion of abdominal wall                                       |
| JAA13 | Wide excision of extensive necrotising conditions of abdominal wall        |
| JAA96 | Other local operation on abdominal wall                                    |
| JAK00 | Laparotomy and drainage of peritoneal cavity                               |
| JAK03 | Laparotomy and peritoneal irrigation                                       |
| JAK10 | Laparotomy and insertion of peritoneal dialysis catheter                   |
| JAL00 | Biopsy of peritoneum                                                       |
| JAL10 | Laparotomy and removal of foreign body                                     |
| JAL20 | Excision or destruction of lesion of peritoneum                            |
| JAL23 | Excision of local lesion of pelvic wall                                    |
| JAL30 | Omentectomy                                                                |
| JAL50 | Intraabdominal revision of shunt of ventricle of brain                     |
| JAL96 | Other excision of lesion of peritoneum                                     |
| JAM00 | Transposition of omentum                                                   |
| JAM10 | Operation for malrotation of intestine                                     |
| JAN00 | Creation of peritoneovenous shunt                                          |
| JAN10 | Revision of peritoneovenous shunt                                          |
| JAN20 | Removal of peritoneovenous shunt                                           |
| JAP00 | Freeing of adhesions in the peritoneal cavity                              |
| JAQ00 | Extensive excision of peritoneum                                           |
| JAQ10 | Intraoperative hyperthermic chemotherapeutic perfusion of abdominal cavity |
| JAW96 | Other operation on abdominal wall, peritoneum, mesentery or omentum        |
| JBA00 | Transabdominal repair of diaphragm for rupture                             |

*Postoperative wound dehiscence after laparotomy: a useful health care quality indicator? A cohort study based on Norwegian hospital administrative data*

| Code  | Title                                                                                  |
|-------|----------------------------------------------------------------------------------------|
| JBA10 | Transabdominal biopsy or excision of lesion of diaphragm                               |
| JBA20 | Transabdominal partial excision of diaphragm                                           |
| JBW96 | Other transabdominal operation on diaphragm or operation for gastro-oesophageal reflux |

Table 16. NCSP-N codes for procedures on kidney and pelvis of kidney

| Code  | Title                                                                                   |
|-------|-----------------------------------------------------------------------------------------|
| KAA00 | Exploration of kidney                                                                   |
| KAA20 | Exploratory nephrotomy                                                                  |
| KAA30 | Exploratory pyelotomy                                                                   |
| KAA96 | Other exploration of kidney or pelvis of kidney                                         |
| KAB00 | Biopsy of kidney or pelvis of kidney                                                    |
| KAC00 | Nephrectomy                                                                             |
| KAC20 | Nephroureterectomy                                                                      |
| KAD00 | Partial nephrectomy                                                                     |
| KAD10 | Heminephrectomy                                                                         |
| KAD40 | Partial excision of pelvis of kidney                                                    |
| KAD50 | Destruction of tumour of pelvis of kidney                                               |
| KAD56 | Destruction of lesion of renal parenchyma                                               |
| KAD60 | Percutaneous destruction of lesion of renal parenchyma                                  |
| KAD96 | Other partial excision of kidney or pelvis of kidney                                    |
| KAE00 | Nephrolithotomy                                                                         |
| KAE10 | Pyelolithotomy                                                                          |
| KAE96 | Other removal of calculus from kidney or pelvis of kidney                               |
| KAF00 | Removal of foreign body from kidney                                                     |
| KAF10 | Removal of foreign body from pelvis of kidney                                           |
| KAH00 | Suture of kidney                                                                        |
| KAH10 | Suture of pelvis of kidney                                                              |
| KAH30 | Pyeloureteroplasty without division of ureteropelvic junction                           |
| KAH40 | Pyeloureteroplasty with division of ureteropelvic junction                              |
| KAH50 | Ureterocalyceal anastomosis                                                             |
| KAH70 | Freeing of adhesions of ureteropelvic junction                                          |
| KAH80 | Nephropexy                                                                              |
| KAH96 | Other reconstruction of kidney or pelvis of kidney                                      |
| KAS00 | Autotransplantation of kidney                                                           |
| KAS10 | Allogenic transplantation of kidney from cadaver donor                                  |
| KAS13 | Allogenic transplantation of kidney from cadaver donor                                  |
| KAS20 | Allogenic transplantation of kidney from living donor with minimally invasive technique |
| KAS23 | Allogenic transplantation of kidney from living donor with minimally invasive technique |
| KAS40 | Excision of transplanted kidney                                                         |
| KAS50 | Nephrocystostomy in transplanted kidney                                                 |
| KAS60 | Operation for lymphocele of transplanted kidney                                         |
| KAS96 | Other transplantation of kidney or related procedure                                    |
| KAW96 | Other operation on kidney or pelvis of kidney                                           |

*Postoperative wound dehiscence after laparotomy: a useful health care quality indicator? A cohort study based on Norwegian hospital administrative data*

Table 17. NCSP-N codes for procedures on other urinary and male genital organs: ureter, bladder, urethra, prostate and seminal vesicles

| Code  | Title                                                               |
|-------|---------------------------------------------------------------------|
| KBA00 | Exploration of ureter                                               |
| KBA10 | Exploratory ureterotomy                                             |
| KBA96 | Other exploration of ureter                                         |
| KBB00 | Biopsy of ureter                                                    |
| KBC00 | Ureterectomy                                                        |
| KBD00 | Partial excision of ureter                                          |
| KBD20 | Destruction of tumour of ureter                                     |
| KBD30 | Excision of stump of ureter                                         |
| KBD96 | Other partial excision of ureter or destruction of tumour of ureter |
| KBE00 | Ureterolithotomy                                                    |
| KBE96 | Other operation for calculus of ureter                              |
| KBF00 | Removal of foreign body from ureter                                 |
| KBH00 | Suture of ureter                                                    |
| KBH06 | Ureteroureterostomy                                                 |
| KBH10 | Connection of ureter to contralateral ureter                        |
| KBH20 | Replantation of ureter                                              |
| KBH30 | Ileal replacement of ureter                                         |
| KBH40 | Plastic repair of ureter                                            |
| KBH50 | Ureterolysis                                                        |
| KBH96 | Other repair or connection of ureter                                |
| KBJ00 | Cutaneous ureterostomy                                              |
| KBJ10 | Cutaneous ureteroenterostomy                                        |
| KBJ20 | Cutaneous ureteroenterostomy with reservoir                         |
| KBJ40 | Ureteroenterostomy                                                  |
| KBJ60 | Anastomosis of ureter to urethra with interposition of ileum        |
| KBJ70 | Removal of calculus from ileal conduit or reservoir                 |
| KBJ80 | Operation for malfunction of urinary diversion                      |
| KBJ96 | Other urinary diversion from ureter or related operation            |
| KBV00 | Insertion of stent into ureter                                      |
| KBV10 | Removal of stent from ureter                                        |
| KBV40 | Incision or excision of ureterocele                                 |
| KBW96 | Other operation on ureter                                           |
| KCA00 | Exploratory cystotomy                                               |
| KCB00 | Biopsy of bladder                                                   |
| KCC00 | Cystectomy                                                          |
| KCC10 | Cystoprostatectomy                                                  |
| KCC20 | Cystoprostatourethrectomy                                           |
| KCC30 | Cystectomy with excision of female internal genital organs          |
| KCC96 | Other cystectomy                                                    |
| KCD10 | Partial cystectomy                                                  |
| KCD20 | Excision of diverticulum of bladder                                 |
| KCD30 | Destruction of tumour of bladder                                    |

Postoperative wound dehiscence after laparotomy: a useful health care quality indicator? A cohort study based on Norwegian hospital administrative data

For peer review only - <http://bmjopen.bmj.com/site/about/guidelines.xhtml>

| Code  | Title                                                                  |
|-------|------------------------------------------------------------------------|
| KCD40 | Excision of urachus or other vesicocutaneous fistula                   |
| KCD96 | Other partial excision or destruction of tumour of bladder             |
| KCE00 | Cystolithotomy                                                         |
| KCF00 | Cystotomy and removal of foreign body from bladder                     |
| KCH00 | Suture of bladder                                                      |
| KCH10 | Enterocystoplasty                                                      |
| KCH20 | Reduction cystoplasty                                                  |
| KCH30 | Closure of vesicointestinal fistula                                    |
| KCH40 | Incision or resection of bladder neck                                  |
| KCH96 | Other reconstructive operation on bladder                              |
| KCJ00 | Cystostomy                                                             |
| KCJ10 | Cutaneous cystoenterostomy                                             |
| KCJ20 | Continent cutaneous cystoenterostomy                                   |
| KCJ96 | Other cystostomy                                                       |
| KCV10 | Denervation of bladder                                                 |
| KCV20 | Freeing of bladder                                                     |
| KCW96 | Other operations on bladder                                            |
| KDC00 | Urethrectomy                                                           |
| KDD00 | Partial excision of urethra                                            |
| KDD10 | Excision of diverticulum of urethra                                    |
| KDD30 | Destruction of tumour of urethra                                       |
| KDD40 | Resection of external sphincter of urethra                             |
| KDD50 | Excision of urethral valve                                             |
| KDD80 | Partial excision of urethra and repair using graft or flap             |
| KDD96 | Other partial excision of urethra                                      |
| KDG00 | Retropubic suspension of urethra                                       |
| KDG20 | Abdominal colposuspension                                              |
| KDG30 | Suprapubic sling urethrocystopexy                                      |
| KDG40 | Suprapubic urethrocystopexy                                            |
| KDG43 | Transobturatorial sling urethrocystopexy                               |
| KDG50 | Transabdominal plastic repair of pelvic floor for urinary incontinence |
| KDG60 | Implantation of adjustable expander around bladder neck                |
| KDG70 | Exploration of urethra                                                 |
| KDG96 | Other operation on urethra or bladder neck for incontinence            |
| KDH00 | Suture of urethra                                                      |
| KDH10 | Meatoplasty of urethra                                                 |
| KDH30 | Closure of urethrocutaneous fistula                                    |
| KDH50 | Closure of urethrointestinal fistula                                   |
| KDH70 | Plastic repair of stricture of urethra                                 |
| KDH96 | Other reconstructive operation on urethra                              |
| KDJ00 | Urethrostomy                                                           |
| KDK00 | Implantation of artificial urinary sphincter around bladder neck       |
| KDK10 | Implantation of artificial urinary sphincter around bulbar urethra     |
| KDK30 | Revision of artificial urethral sphincter                              |

*Postoperative wound dehiscence after laparotomy: a useful health care quality indicator? A cohort study based on Norwegian hospital administrative data*

For peer review only - <http://bmjopen.bmj.com/site/about/guidelines.xhtml>

| Code  | Title                                          |
|-------|------------------------------------------------|
| KDK40 | Removal of artificial urethral sphincter       |
| KDW96 | Other operation on urethra                     |
| KEA00 | Exploration of prostate                        |
| KEA10 | Prostatotomy                                   |
| KEA20 | Incision of seminal vesicle                    |
| KEB00 | Biopsy of prostate                             |
| KED96 | Other partial excision of prostate             |
| KEE00 | Prostatalithotomy                              |
| KEE10 | Removal of foreign body from prostate          |
| KEW96 | Other operation on prostate or seminal vesicle |

Table 18- NCSP-N codes for procedures on female genital organs: ovary, fallopian tube, uterus and uterine ligaments

| Code  | Title                                                 |
|-------|-------------------------------------------------------|
| LAA00 | Puncture of ovarian cyst                              |
| LAB00 | Ovariectomy                                           |
| LAB10 | Biopsy of ovary                                       |
| LAB96 | Other incision or biopsy of ovary                     |
| LAC00 | Excision of ovarian cyst                              |
| LAC10 | Fenestration of ovarian cyst                          |
| LAC20 | Destruction of lesion of ovary                        |
| LAC30 | Excision of paraovarian cyst                          |
| LAC96 | Other excision or destruction of lesion of ovary      |
| LAD00 | Partial excision of ovary                             |
| LAE10 | Unilateral oophorectomy                               |
| LAE20 | Bilateral oophorectomy                                |
| LAF00 | Unilateral salpingo-oophorectomy                      |
| LAF10 | Bilateral salpingo-oophorectomy                       |
| LAF20 | Unilateral transvaginal salpingo-oophorectomy         |
| LAF30 | Bilateral transvaginal salpingo-oophorectomy          |
| LAG00 | Freeing of adhesions of ovary                         |
| LAG10 | Oophoropexy                                           |
| LAG20 | Detorsion of ovary                                    |
| LAG96 | Other reconstructive operation on ovary               |
| LAW96 | Other operation on ovary                              |
| LBB00 | Biopsy of Fallopian tube                              |
| LBB96 | Other biopsy of Fallopian tube                        |
| LBC10 | Removal of products of conception from Fallopian tube |
| LBC20 | Salpingotomy and removal of products of conception    |
| LBC96 | Other tube conserving operation for tubal pregnancy   |
| LBD00 | Partial excision of Fallopian tube                    |
| LBE00 | Salpingectomy                                         |
| LBF00 | Perfusion of Fallopian tube                           |

*Postoperative wound dehiscence after laparotomy: a useful health care quality indicator? A cohort study based on Norwegian hospital administrative data*

| Code  | Title                                                 |
|-------|-------------------------------------------------------|
| LBF03 | Perfusion of Fallopian tube after reconstruction      |
| LBF20 | Transcervical catheter salpingoplasty                 |
| LBF30 | Salpingolysis                                         |
| LBF40 | Fimbrioplasty                                         |
| LBF50 | Salpingostomy                                         |
| LBF60 | Partial excision and anastomosis of Fallopian tube    |
| LBF70 | Partial excision and reimplantation of Fallopian tube |
| LBF96 | Other operation on Fallopian tube for infertility     |
| LBW96 | Other operation on Fallopian tube                     |
| LCA00 | Biopsy of uterus or uterine ligaments                 |
| LCB00 | Hysterotomy                                           |
| LCB10 | Myomectomy                                            |
| LCB96 | Other excision of lesion of uterus                    |
| LCC00 | Partial excision of uterus                            |
| LCC10 | Supravaginal hysterectomy                             |
| LCC20 | Vaginal supravaginal hysterectomy                     |
| LCC96 | Other partial excision of uterus                      |
| LCD00 | Hysterectomy                                          |
| LCD10 | Vaginal hysterectomy                                  |
| LCD30 | Radical hysterectomy                                  |
| LCD40 | Radical vaginal hysterectomy                          |
| LCD96 | Other hysterectomy                                    |
| LCE00 | Anterior exenteration of female pelvis                |
| LCE10 | Posterior exenteration of female pelvis               |
| LCE20 | Total exenteration of female pelvis                   |
| LCE96 | Other exenteration of female pelvis                   |
| LCF00 | Excision of lesion of parametrium                     |
| LCF10 | Excision of female varicocele                         |
| LCF96 | Other excision of lesion of parametrium               |
| LCG10 | Suture of uterus                                      |
| LCG20 | Hysteropexy                                           |
| LCG30 | Resection or transcision of sacrouterine ligaments    |
| LCG40 | Reconstruction of uterus                              |
| LCG96 | Other reconstructive operation on uterus              |
| LCW96 | Other operation on uterus and uterine ligaments       |



Table 19. NCSP-N codes for procedures on the peripheral vessels of the abdomen

| Code  | Title                                                                                                       |
|-------|-------------------------------------------------------------------------------------------------------------|
| PCB20 | Ligature of coeliac trunk and branches                                                                      |
| PCB30 | Ligature of superior mesenteric artery                                                                      |
| PCB40 | Ligature of renal artery                                                                                    |
| PCB99 | Ligature of other visceral artery                                                                           |
| PCC10 | Suture of suprarenal or juxtarenal abdominal aorta                                                          |
| PCC20 | Suture of coeliac trunk and branches                                                                        |
| PCC30 | Suture of superior mesenteric artery                                                                        |
| PCC40 | Suture of renal artery                                                                                      |
| PCC99 | Suture of other visceral artery                                                                             |
| PCE30 | Thrombectomy or embolectomy of superior mesenteric artery                                                   |
| PCE40 | Thrombectomy or embolectomy of renal artery                                                                 |
| PCE99 | Thrombectomy or embolectomy of other visceral artery                                                        |
| PCF20 | Thrombendarterectomy of coeliac trunk and branches                                                          |
| PCF30 | Thrombendarterectomy of superior mesenteric artery                                                          |
| PCF40 | Thrombendarterectomy of renal artery                                                                        |
| PCF99 | Thrombendarterectomy of other visceral artery                                                               |
| PCG10 | Operation for aneurysm of supracoeliac or juxtarenal abdominal aorta                                        |
| PCG20 | Operation for aneurysm of coeliac trunk and branches                                                        |
| PCG30 | Operation for aneurysm of superior mesenteric artery                                                        |
| PCG40 | Operation for aneurysm of renal artery                                                                      |
| PCG99 | Operation for aneurysm of other visceral artery                                                             |
| PCH10 | Bypass from supracoeliac or juxtarenal abdominal aorta                                                      |
| PCH20 | Bypass to/from coeliac trunk and branches                                                                   |
| PCH30 | Bypass from superior mesenteric artery                                                                      |
| PCH40 | Bypass from renal artery                                                                                    |
| PCH99 | Bypass from other visceral artery                                                                           |
| PCJ30 | Transposition of superior mesenteric artery                                                                 |
| PCJ40 | Transposition of renal artery                                                                               |
| PCJ99 | Transposition of other visceral artery                                                                      |
| PCK20 | Reimplantation of coeliac trunk and branches                                                                |
| PCK30 | Reimplantation of superior mesenteric artery                                                                |
| PCK40 | Reimplantation of renal artery                                                                              |
| PCK50 | Reimplantation of inferior mesenteric artery                                                                |
| PCK99 | Reimplantation of other visceral artery                                                                     |
| PCN20 | Plastic repair of coeliac trunk and branches                                                                |
| PCN30 | Plastic repair of superior mesenteric artery                                                                |
| PCN40 | Plastic repair of renal artery                                                                              |
| PCN99 | Plastic repair of other visceral artery                                                                     |
| PCU70 | Exploration of previous reconstruction of suprarenal abdominal aorta or visceral arteries                   |
| PCU74 | Thrombectomy or embolectomy in bypass from suprarenal abdominal aorta and visceral arteries                 |
| PCU81 | Closure of persisting arteriovenous fistula of bypass from suprarenal abdominal aorta and visceral arteries |
| PCU82 | Plastic repair in bypass from suprarenal abdominal aorta and visceral arteries                              |
| PCU99 | Other repair after previous reconstruction of suprarenal abdominal aorta and visceral arteries              |

*Postoperative wound dehiscence after laparotomy: a useful health care quality indicator? A cohort study based on Norwegian hospital administrative data*

| Code  | Title                                                                                                         |
|-------|---------------------------------------------------------------------------------------------------------------|
| PCW99 | Other operation on suprarenal abdominal aorta and visceral arteries                                           |
| PDA10 | Exploration of infrarenal abdominal aorta                                                                     |
| PDA30 | Exploration of iliac artery                                                                                   |
| PDC10 | Suture of infrarenal abdominal aorta                                                                          |
| PDC30 | Suture of iliac artery                                                                                        |
| PDE10 | Thrombectomy or embolectomy of infrarenal abdominal aorta                                                     |
| PDE30 | Thrombectomy or embolectomy of iliac artery                                                                   |
| PDF10 | Thrombendarterectomy of infrarenal abdominal aorta                                                            |
| PDF30 | Thrombendarterectomy of iliac artery                                                                          |
| PDG10 | Operation on infrarenal abdominal aorta for aneurysm                                                          |
| PDG20 | Bypass from aorta to iliac artery for aneurysm                                                                |
| PDG21 | Bypass from aorta to bilateral iliac arteries for aneurysm                                                    |
| PDG22 | Bypass from aorta to iliac and contralateral femoral artery for aneurysm                                      |
| PDG23 | Bypass from aorta to femoral artery for aneurysm                                                              |
| PDG24 | Bypass from aorta to bilateral femoral arteries for aneurysm                                                  |
| PDG30 | Operation on iliac artery for aneurysm                                                                        |
| PDG35 | Bypass from iliac to femoral artery for aneurysm                                                              |
| PDG99 | Other operation for aneurysm of infrarenal abdominal aorta and iliac arteries                                 |
| PDH10 | Bypass from infrarenal abdominal aorta                                                                        |
| PDH20 | Bypass from aorta to iliac artery                                                                             |
| PDH21 | Bypass from aorta to bilateral iliac arteries                                                                 |
| PDH22 | Bypass from aorta to iliac and contralateral femoral artery                                                   |
| PDH23 | Bypass from aorta to femoral artery                                                                           |
| PDH24 | Bypass from aorta to bilateral femoral arteries                                                               |
| PDH30 | Bypass from iliac artery                                                                                      |
| PDH35 | Bypass from iliac to femoral artery                                                                           |
| PDH99 | Other bypass from abdominal aorta or iliac artery                                                             |
| PDN10 | Plastic repair of infrarenal abdominal aorta                                                                  |
| PDN30 | Plastic repair of iliac artery                                                                                |
| PDU70 | Exploration of previous reconstruction of infrarenal abdominal aorta or iliac arteries and distal connections |
| PDU74 | Thrombectomy or embolectomy in bypass from infrarenal abdominal aorta or iliac artery                         |
| PDU81 | Closure of persisting arteriovenous fistula of bypass from infrarenal abdominal aorta or iliac artery         |
| PDU82 | Plastic repair of bypass from infrarenal abdominal aorta or iliac artery                                      |
| PDU99 | Other repair after previous reconstruction of infrarenal abdominal aorta and iliac arteries and distal        |
| PDW99 | Other operation on infrarenal abdominal aorta and iliac arteries and distal connections                       |
| PHB23 | Ligature of iliac vein                                                                                        |
| PHB30 | Ligature of inferior vena cava                                                                                |
| PHB31 | Ligature of renal vein                                                                                        |
| PHB32 | Ligature of portal vein                                                                                       |
| PHB33 | Ligature of v. mesenterica superior                                                                           |
| PHB34 | Ligature of v. mesenterica inferior                                                                           |
| PHB36 | Ligature of v. spermatica                                                                                     |
| PHC23 | Suture of iliac vein                                                                                          |
| PHC30 | Suture of inferior vena cava                                                                                  |

*Postoperative wound dehiscence after laparotomy: a useful health care quality indicator? A cohort study based on Norwegian hospital administrative data*

For peer review only - <http://bmjopen.bmj.com/site/about/guidelines.xhtml>

| Code  | Title                                     |
|-------|-------------------------------------------|
| PHC31 | Suture of renal vein                      |
| PHC32 | Suture of portal vein                     |
| PHC33 | Suture of v. mesenterica superior         |
| PHC34 | Suture of v. mesenterica inferior         |
| PHD30 | Resection of inferior vena cava           |
| PHD32 | Resection of portal vein                  |
| PHD33 | Resection of v. mesenterica superior      |
| PHD34 | Resection of v. mesenterica inferior      |
| PHD36 | Resection of v. spermatica                |
| PHE23 | Thrombectomy of iliac vein                |
| PHE30 | Thrombectomy of inferior vena cava        |
| PHE31 | Thrombectomy of renal vein                |
| PHH25 | Bypass from iliac vein                    |
| PHH30 | Bypass from inferior vena cava            |
| PHN30 | Plastic repair of inferior vena cava      |
| PHN32 | Plastic repair of portal vein             |
| PHN33 | Plastic repair of v. mesenterica superior |
| PHN34 | Plastic repair of v. mesenterica inferior |
| PHW35 | Portosystemic shunt or bypass             |

**The RECORD statement – checklist of items, extended from the STROBE statement, that should be reported in observational studies using routinely collected health data.**

|                           | Item No. | STROBE items                                                                                                                                                                               | Location in manuscript where items are reported | RECORD items                                                                                                                                                                                                                                                                                                                                                                                                                                | Location in manuscript where items are reported                                                                |
|---------------------------|----------|--------------------------------------------------------------------------------------------------------------------------------------------------------------------------------------------|-------------------------------------------------|---------------------------------------------------------------------------------------------------------------------------------------------------------------------------------------------------------------------------------------------------------------------------------------------------------------------------------------------------------------------------------------------------------------------------------------------|----------------------------------------------------------------------------------------------------------------|
| <b>Title and abstract</b> |          |                                                                                                                                                                                            |                                                 |                                                                                                                                                                                                                                                                                                                                                                                                                                             |                                                                                                                |
|                           | 1        | (a) Indicate the study's design with a commonly used term in the title or the abstract (b) Provide in the abstract an informative and balanced summary of what was done and what was found | Title                                           | RECORD 1.1: The type of data used should be specified in the title or abstract. When possible, the name of the databases used should be included.<br><br>RECORD 1.2: If applicable, the geographic region and timeframe within which the study took place should be reported in the title or abstract.<br><br>RECORD 1.3: If linkage between databases was conducted for the study, this should be clearly stated in the title or abstract. | Title and abstract<br><br>Abstract 1 21<br><br>Title and abstract 1 20-21<br><br>No linkages between databases |
| <b>Introduction</b>       |          |                                                                                                                                                                                            |                                                 |                                                                                                                                                                                                                                                                                                                                                                                                                                             |                                                                                                                |
| Background rationale      | 2        | Explain the scientific background and rationale for the investigation being reported                                                                                                       | Introduction, 1 49-73                           |                                                                                                                                                                                                                                                                                                                                                                                                                                             |                                                                                                                |
| Objectives                | 3        | State specific objectives, including any prespecified hypotheses                                                                                                                           | Introduction, 1 74-79                           |                                                                                                                                                                                                                                                                                                                                                                                                                                             |                                                                                                                |
| <b>Methods</b>            |          |                                                                                                                                                                                            |                                                 |                                                                                                                                                                                                                                                                                                                                                                                                                                             |                                                                                                                |
| Study Design              | 4        | Present key elements of study design early in the paper                                                                                                                                    | Abstract, 1 20-30.                              |                                                                                                                                                                                                                                                                                                                                                                                                                                             |                                                                                                                |
| Setting                   | 5        | Describe the setting, locations, and relevant dates, including periods of recruitment, exposure, follow-up, and data collection                                                            | Materials and methods                           |                                                                                                                                                                                                                                                                                                                                                                                                                                             |                                                                                                                |
| Participants              | 6        | (a) <i>Cohort study</i> - Give the eligibility criteria, and the                                                                                                                           | Materials and methods, 1. 81-82                 | RECORD 6.1: The methods of study population selection (such as codes or                                                                                                                                                                                                                                                                                                                                                                     | Materials and methods, 1 96-109.                                                                               |

|                              |   |                                                                                                                                                                                                                                                                                                                                                                                                                                                                                                                                                                                                                                                             |                                                                                                                           |                                                                                                                                                                                                                                                                                                                                                                                                                                                                                                                                                                                                                              |                                                                                                                                                                                           |
|------------------------------|---|-------------------------------------------------------------------------------------------------------------------------------------------------------------------------------------------------------------------------------------------------------------------------------------------------------------------------------------------------------------------------------------------------------------------------------------------------------------------------------------------------------------------------------------------------------------------------------------------------------------------------------------------------------------|---------------------------------------------------------------------------------------------------------------------------|------------------------------------------------------------------------------------------------------------------------------------------------------------------------------------------------------------------------------------------------------------------------------------------------------------------------------------------------------------------------------------------------------------------------------------------------------------------------------------------------------------------------------------------------------------------------------------------------------------------------------|-------------------------------------------------------------------------------------------------------------------------------------------------------------------------------------------|
|                              |   | <p>sources and methods of selection of participants. Describe methods of follow-up</p> <p><i>Case-control study</i> - Give the eligibility criteria, and the sources and methods of case ascertainment and control selection. Give the rationale for the choice of cases and controls</p> <p><i>Cross-sectional study</i> - Give the eligibility criteria, and the sources and methods of selection of participants</p> <p><i>(b) Cohort study</i> - For matched studies, give matching criteria and number of exposed and unexposed</p> <p><i>Case-control study</i> - For matched studies, give matching criteria and the number of controls per case</p> | <p>and 1 96-109</p>                                                                                                       | <p>algorithms used to identify subjects) should be listed in detail. If this is not possible, an explanation should be provided.</p> <p>RECORD 6.2: Any validation studies of the codes or algorithms used to select the population should be referenced. If validation was conducted for this study and not published elsewhere, detailed methods and results should be provided.</p> <p>RECORD 6.3: If the study involved linkage of databases, consider use of a flow diagram or other graphical display to demonstrate the data linkage process, including the number of individuals with linked data at each stage.</p> | <p>All codes are listed in the Supplementary File</p> <p>References to validation studies are given in Introduction, 1 66-69, and in Discussion, 1 196</p> <p>Not considered relevant</p> |
| Variables                    | 7 | Clearly define all outcomes, exposures, predictors, potential confounders, and effect modifiers. Give diagnostic criteria, if applicable.                                                                                                                                                                                                                                                                                                                                                                                                                                                                                                                   | Materials and methods, 1 96-109, and Supplementary File. Model variables are specified in Statistical methods, 1. 115-120 | RECORD 7.1: A complete list of codes and algorithms used to classify exposures, outcomes, confounders, and effect modifiers should be provided. If these cannot be reported, an explanation should be provided.                                                                                                                                                                                                                                                                                                                                                                                                              | Codes are listed in the Supplementary File                                                                                                                                                |
| Data sources/<br>measurement | 8 | For each variable of interest, give sources of data and details of methods of assessment (measurement). Describe comparability of assessment methods if there is more than one group                                                                                                                                                                                                                                                                                                                                                                                                                                                                        | Covered by the above                                                                                                      |                                                                                                                                                                                                                                                                                                                                                                                                                                                                                                                                                                                                                              |                                                                                                                                                                                           |
| Bias                         | 9 | Describe any efforts to address potential sources of bias                                                                                                                                                                                                                                                                                                                                                                                                                                                                                                                                                                                                   | Hospital PWD rates are risk adjusted, see                                                                                 |                                                                                                                                                                                                                                                                                                                                                                                                                                                                                                                                                                                                                              |                                                                                                                                                                                           |

|                                                                                                                                                    |                                  |    |                                                                                                                                                                                                                                                                                                                                                                                                                                                                                                                                                                      |                                                                                                                                                                                                                                   |                                                                                        |
|----------------------------------------------------------------------------------------------------------------------------------------------------|----------------------------------|----|----------------------------------------------------------------------------------------------------------------------------------------------------------------------------------------------------------------------------------------------------------------------------------------------------------------------------------------------------------------------------------------------------------------------------------------------------------------------------------------------------------------------------------------------------------------------|-----------------------------------------------------------------------------------------------------------------------------------------------------------------------------------------------------------------------------------|----------------------------------------------------------------------------------------|
|                                                                                                                                                    |                                  |    | statistical methods 1<br>115-120                                                                                                                                                                                                                                                                                                                                                                                                                                                                                                                                     |                                                                                                                                                                                                                                   |                                                                                        |
| 1<br>2<br>3<br>4                                                                                                                                   | Study size                       | 10 | Explain how the study size was arrived at                                                                                                                                                                                                                                                                                                                                                                                                                                                                                                                            | Determined by study period                                                                                                                                                                                                        |                                                                                        |
| 5<br>6<br>7<br>8<br>9                                                                                                                              | Quantitative variables           | 11 | Explain how quantitative variables were handled in the analyses. If applicable, describe which groupings were chosen, and why                                                                                                                                                                                                                                                                                                                                                                                                                                        | Model variables are specified in Statistical methods, 1. 115-120                                                                                                                                                                  |                                                                                        |
| 10<br>11<br>12<br>13<br>14<br>15<br>16<br>17<br>18<br>19<br>20<br>21<br>22<br>23<br>24<br>25<br>26<br>27<br>28<br>29<br>30<br>31<br>32<br>33<br>34 | Statistical methods              | 12 | (a) Describe all statistical methods, including those used to control for confounding<br>(b) Describe any methods used to examine subgroups and interactions<br>(c) Explain how missing data were addressed<br>(d) <i>Cohort study</i> - If applicable, explain how loss to follow-up was addressed<br><i>Case-control study</i> - If applicable, explain how matching of cases and controls was addressed<br><i>Cross-sectional study</i> - If applicable, describe analytical methods taking account of sampling strategy<br>(e) Describe any sensitivity analyses | a) See Statistical methods<br>c) No missing data were found in final data set<br>d) Loss to follow up assumed to be very low and uniform across hospitals<br>e) Materials and methods, 1 131-134, Results, 1 173-174              |                                                                                        |
| 35<br>36<br>37<br>38<br>39<br>40<br>41<br>42<br>43<br>44                                                                                           | Data access and cleaning methods |    | ..                                                                                                                                                                                                                                                                                                                                                                                                                                                                                                                                                                   | RECORD 12.1: Authors should describe the extent to which the investigators had access to the database population used to create the study population.<br><br>RECORD 12.2: Authors should provide information on the data cleaning | The authors had no access to the NPR's databases<br><br>Materials and methods, 1 89-91 |

|                                                                            |                  |    |                                                                                                                                                                                                                                                                                                                               |                                                                                                                                                                                                                           |                                                                                                                                                                                                                                                                                                           |
|----------------------------------------------------------------------------|------------------|----|-------------------------------------------------------------------------------------------------------------------------------------------------------------------------------------------------------------------------------------------------------------------------------------------------------------------------------|---------------------------------------------------------------------------------------------------------------------------------------------------------------------------------------------------------------------------|-----------------------------------------------------------------------------------------------------------------------------------------------------------------------------------------------------------------------------------------------------------------------------------------------------------|
|                                                                            |                  |    |                                                                                                                                                                                                                                                                                                                               | methods used in the study.                                                                                                                                                                                                |                                                                                                                                                                                                                                                                                                           |
| 1<br>2<br>3<br>4<br>5<br>6<br>7                                            | Linkage          | .. |                                                                                                                                                                                                                                                                                                                               | RECORD 12.3: State whether the study included person-level, institutional-level, or other data linkage across two or more databases. The methods of linkage and methods of linkage quality evaluation should be provided. | NPR provided linkage to National Registry using the unique PIN                                                                                                                                                                                                                                            |
| 8                                                                          | <b>Results</b>   |    |                                                                                                                                                                                                                                                                                                                               |                                                                                                                                                                                                                           |                                                                                                                                                                                                                                                                                                           |
| 9                                                                          | Participants     | 13 | (a) Report the numbers of individuals at each stage of the study (e.g., numbers potentially eligible, examined for eligibility, confirmed eligible, included in the study, completing follow-up, and analysed)<br>(b) Give reasons for non-participation at each stage.<br>(c) Consider use of a flow diagram                 | Results, 1 146-151                                                                                                                                                                                                        | RECORD 13.1: Describe in detail the selection of the persons included in the study (i.e., study population selection) including filtering based on data quality, data availability and linkage. The selection of included persons can be described in the text and/or by means of the study flow diagram. |
| 10<br>11<br>12<br>13<br>14<br>15<br>16<br>17<br>18<br>19<br>20<br>21       | Descriptive data | 14 | (a) Give characteristics of study participants (e.g., demographic, clinical, social) and information on exposures and potential confounders<br>(b) Indicate the number of participants with missing data for each variable of interest<br>(c) <i>Cohort study</i> - summarise follow-up time (e.g., average and total amount) | a) Results, Table 1<br>b) See above<br>c) Not relevant                                                                                                                                                                    |                                                                                                                                                                                                                                                                                                           |
| 22<br>23<br>24<br>25<br>26<br>27<br>28<br>29<br>30<br>31<br>32<br>33<br>34 | Outcome data     | 15 | <i>Cohort study</i> - Report numbers of outcome events or summary measures over time<br><i>Case-control study</i> - Report numbers in each exposure category, or summary measures of exposure<br><i>Cross-sectional study</i> - Report                                                                                        | Results, Table 1                                                                                                                                                                                                          |                                                                                                                                                                                                                                                                                                           |

|                                                                                                 |                |                                               |                                                                                                                                                                                                                                                                                                                                                                                                                 |                                          |                                                                                                                                                                                                                                                                                                          |
|-------------------------------------------------------------------------------------------------|----------------|-----------------------------------------------|-----------------------------------------------------------------------------------------------------------------------------------------------------------------------------------------------------------------------------------------------------------------------------------------------------------------------------------------------------------------------------------------------------------------|------------------------------------------|----------------------------------------------------------------------------------------------------------------------------------------------------------------------------------------------------------------------------------------------------------------------------------------------------------|
|                                                                                                 |                | numbers of outcome events or summary measures |                                                                                                                                                                                                                                                                                                                                                                                                                 |                                          |                                                                                                                                                                                                                                                                                                          |
| 1<br>2<br>3<br>4<br>5<br>6<br>7<br>8<br>9<br>10<br>11<br>12<br>13<br>14<br>15<br>16<br>17<br>18 | Main results   | 16                                            | (a) Give unadjusted estimates and, if applicable, confounder-adjusted estimates and their precision (e.g., 95% confidence interval). Make clear which confounders were adjusted for and why they were included<br>(b) Report category boundaries when continuous variables were categorized<br>(c) If relevant, consider translating estimates of relative risk into absolute risk for a meaningful time period | Results, l 156-157 and Figure 1, Table 2 |                                                                                                                                                                                                                                                                                                          |
| 19<br>20<br>21<br>22                                                                            | Other analyses | 17                                            | Report other analyses done—e.g., analyses of subgroups and interactions, and sensitivity analyses                                                                                                                                                                                                                                                                                                               | Results, l 168-174, Figure 1             |                                                                                                                                                                                                                                                                                                          |
| <b>Discussion</b>                                                                               |                |                                               |                                                                                                                                                                                                                                                                                                                                                                                                                 |                                          |                                                                                                                                                                                                                                                                                                          |
| 24<br>25<br>26                                                                                  | Key results    | 18                                            | Summarise key results with reference to study objectives                                                                                                                                                                                                                                                                                                                                                        | Discussion, l 176-184                    |                                                                                                                                                                                                                                                                                                          |
| 27<br>28<br>29<br>30<br>31<br>32<br>33<br>34<br>35                                              | Limitations    | 19                                            | Discuss limitations of the study, taking into account sources of potential bias or imprecision. Discuss both direction and magnitude of any potential bias                                                                                                                                                                                                                                                      |                                          | RECORD 19.1: Discuss the implications of using data that were not created or collected to answer the specific research question(s). Include discussion of misclassification bias, unmeasured confounding, missing data, and changing eligibility over time, as they pertain to the study being reported. |
| 36<br>37<br>38<br>39<br>40<br>41<br>42<br>43<br>44                                              | Interpretation | 20                                            | Give a cautious overall interpretation of results considering objectives, limitations, multiplicity of analyses, results from similar studies, and other relevant evidence                                                                                                                                                                                                                                      | Conclusions, l 220-231                   | Discussion, l 198-218                                                                                                                                                                                                                                                                                    |

1  
2  
3  
4  
5  
6  
7  
8  
9  
10  
11  
12  
13  
14  
15  
16  
17  
18  
19  
20  
21  
22  
23  
24  
25  
26  
27  
28  
29  
30  
31  
32  
33  
34  
35  
36  
37  
38  
39  
40  
41  
42  
43  
44  
45  
46  
47



|                                        |                                                           |    |                                                                                                                                                               |                                  |                                                                                                                                                          |                                  |
|----------------------------------------|-----------------------------------------------------------|----|---------------------------------------------------------------------------------------------------------------------------------------------------------------|----------------------------------|----------------------------------------------------------------------------------------------------------------------------------------------------------|----------------------------------|
| 1<br>2<br>3                            | Generalisability                                          | 21 | Discuss the generalisability (external validity) of the study results                                                                                         | Discussion, 1 214-218            |                                                                                                                                                          |                                  |
| 4                                      | <b>Other Information</b>                                  |    |                                                                                                                                                               |                                  |                                                                                                                                                          |                                  |
| 5<br>6<br>7<br>8<br>9                  | Funding                                                   | 22 | Give the source of funding and the role of the funders for the present study and, if applicable, for the original study on which the present article is based | No specific funding was received |                                                                                                                                                          |                                  |
| 10<br>11<br>12<br>13<br>14<br>15<br>16 | Accessibility of protocol, raw data, and programming code |    | ..                                                                                                                                                            |                                  | RECORD 22.1: Authors should provide information on how to access any supplemental information such as the study protocol, raw data, or programming code. | Contact the corresponding author |

\*Reference: Benchimol EI, Smeeth L, Guttman A, Harron K, Moher D, Petersen I, Sørensen HT, von Elm E, Langan SM, the RECORD Working Committee. The REporting of studies Conducted using Observational Routinely-collected health Data (RECORD) Statement. *PLoS Medicine* 2015; in press.

\*Checklist is protected under Creative Commons Attribution ([CC BY](https://creativecommons.org/licenses/by/4.0/)) license.

# BMJ Open

## POSTOPERATIVE WOUND DEHISCENCE AFTER LAPAROTOMY: A USEFUL HEALTH CARE QUALITY INDICATOR? A COHORT STUDY BASED ON NORWEGIAN HOSPITAL ADMINISTRATIVE DATA

|                                 |                                                                                                                                                                                                                                                                                                                                                                                                                                                                                                                                                                                                                                                                                                               |
|---------------------------------|---------------------------------------------------------------------------------------------------------------------------------------------------------------------------------------------------------------------------------------------------------------------------------------------------------------------------------------------------------------------------------------------------------------------------------------------------------------------------------------------------------------------------------------------------------------------------------------------------------------------------------------------------------------------------------------------------------------|
| Journal:                        | <i>BMJ Open</i>                                                                                                                                                                                                                                                                                                                                                                                                                                                                                                                                                                                                                                                                                               |
| Manuscript ID                   | bmjopen-2018-026422.R2                                                                                                                                                                                                                                                                                                                                                                                                                                                                                                                                                                                                                                                                                        |
| Article Type:                   | Research                                                                                                                                                                                                                                                                                                                                                                                                                                                                                                                                                                                                                                                                                                      |
| Date Submitted by the Author:   | 01-Feb-2019                                                                                                                                                                                                                                                                                                                                                                                                                                                                                                                                                                                                                                                                                                   |
| Complete List of Authors:       | Helgeland , Jon ; Norwegian Institute of Public Health, Division of Health Services<br>Tomic, Oliver; Norwegian University of Life Sciences, Department of Mathematic Sciences and Technology<br>Hansen, Tonya; Norwegian Institute of Public Health, Division of Health Services<br>Kristoffersen, Doris; Norwegian Institute of Public Health, Division of Health Services<br>Hassani, Sahar; University of Oslo, KG Jebsen Centre for Psychosis Research, Institute of Clinical Medicine; Oslo University Hospital, Department of Medical Genetics<br>Lindahl, Anne; Akershus University Hospital Trust, Division of Surgery; University of Oslo, Department of Health Administration and Health Economics |
| <b>Primary Subject Heading</b>: | Surgery                                                                                                                                                                                                                                                                                                                                                                                                                                                                                                                                                                                                                                                                                                       |
| Secondary Subject Heading:      | Health services research                                                                                                                                                                                                                                                                                                                                                                                                                                                                                                                                                                                                                                                                                      |
| Keywords:                       | Quality in health care < HEALTH SERVICES ADMINISTRATION & MANAGEMENT, Patient safety, WOUND MANAGEMENT                                                                                                                                                                                                                                                                                                                                                                                                                                                                                                                                                                                                        |
|                                 |                                                                                                                                                                                                                                                                                                                                                                                                                                                                                                                                                                                                                                                                                                               |

SCHOLARONE™  
Manuscripts

1  
2  
3  
4  
5 1 **POSTOPERATIVE WOUND DEHISCENCE AFTER LAPAROTOMY: A**  
6  
7  
8  
9 2 **USEFUL HEALTH CARE QUALITY INDICATOR? A COHORT STUDY**  
10  
11  
12  
13  
14 3 **BASED ON NORWEGIAN HOSPITAL ADMINISTRATIVE DATA**  
15  
16  
17

18 4 Jon Helgeland<sup>1,7</sup>, Oliver Tomic<sup>2</sup>, Tonya Moen Hansen<sup>1</sup>, Doris Tove Kristoffersen<sup>1</sup>, Sahar Hassani<sup>3,4</sup>,  
19  
20 5 Anne Karin Lindahl<sup>5,6</sup>

21  
22 6 <sup>1</sup> Division of Health Services, Norwegian Institute of Public Health, Oslo, Norway

23  
24 7 <sup>2</sup> Department of Mathematical Sciences and Technology, Norwegian University of Life Sciences, Ås,  
25  
26 8 Norway

27  
28 9 <sup>3</sup> NORMENT, KG Jebsen Centre for Psychosis Research, Division of Mental Health and Addiction, Oslo  
29  
30 10 University Hospital and Institute of Clinical Medicine, University of Oslo, Oslo, Norway

31  
32 11 <sup>4</sup> Department of Medical Genetics, Oslo University Hospital, Oslo, Norway

33  
34 12 <sup>5</sup> Division of Surgery, Akershus University Hospital Trust, Lørenskog, Norway

35  
36 13 <sup>6</sup>Department of Health administration and health economics, Institute of Health and Society,  
37  
38 14 University of Oslo, Oslo, Norway

39  
40 15 <sup>7</sup>Corresponding author: Jon Helgeland, [jon.helgeland@fhi.no](mailto:jon.helgeland@fhi.no)

41  
42 16 Norwegian Institute of Public Health, PO Box 222 Skøyen, N-0213 Oslo

43  
44 17 Word count: 3106

45  
46 18 Keywords: Postoperative wound dehiscence, Surgical Quality, Quality Indicators, Patient Safety

47  
48  
49  
50  
51  
52 19  
53  
54  
55  
56  
57  
58  
59  
60

## 20 ABSTRACT

### 21 Objectives

22 Postoperative wound dehiscence (PWD) is a serious complication to laparotomy, leading to higher  
23 mortality, readmissions and cost. The aims of the present study are to investigate whether risk  
24 adjusted PWD rates could reliably differentiate between Norwegian hospitals, and whether PWD  
25 rates were associated with hospital characteristics such as hospital type and laparotomy volume.

### 26 Design

27 Observational study using patient administrative data from all Norwegian hospitals, obtained from  
28 the Norwegian Patient Registry, for the period 2011-2015, and linked using the unique person  
29 identification number.

### 30 Participants

31 All patients undergoing laparotomy, at least 15 years old, with length of stay at least two days, and  
32 no diagnosis code for immunocompromised state or relating to pregnancy, childbirth and  
33 puerperium. The final data set comprised 66 925 patients with 78 086 laparotomy episodes from 47  
34 hospitals.

### 35 Outcomes

36 The outcome was wound dehiscence, identified by the presence of a wound reclosure code, risk  
37 adjusted for patient characteristics and operation type.

## 38 Results

39 The final data set comprised 1 477 wound dehiscences. Crude PWD rates varied from 0% to 5.1%  
40 among hospitals, with an overall rate of 1.89%. Three hospitals with statistically significantly higher  
41 PWD than average were identified, after case mix adjustment and correction for multiple  
42 comparisons. Hospital volume was not associated with PWD rate, except that hospitals with very few  
43 laparotomies had lower PWD rates.

## 44 Conclusions

45 Among Norwegian hospitals, there is considerable variation in PWD rate that cannot be explained by  
46 operation type, age or comorbidity. This warrants further investigation into possible causes, such as  
47 surgical technique, perioperative procedures or handling of complications. The risk adjusted PWD  
48 rate after laparotomy is a candidate quality indicator for Norwegian hospitals.

## 49 STRENGTHS AND LIMITATIONS OF THIS STUDY

- 50 • Includes all laparotomies performed in the nation over a five-year period, with patients  
51 followed across hospitals
- 52 • Extends previous studies to a new health system and a new coding system
- 53 • The statistical analysis uses methods for low event rates, avoiding asymptotic approximation
- 54 • Results may be subject to coding inaccuracy and incompleteness, as well as selection effects
- 55 • There were no data for surgical technique, nor for some clinical factors known to be relevant.

## 56 INTRODUCTION

57 The past decades have seen a major growth in initiatives for measuring, monitoring, and improving  
58 the quality of health care services. Quality indicators are regularly published in many health care  
59 systems. Performance of health care systems is also compared across nations, for instance in the  
60 OECD Health Care Quality and Outcomes (HCQO) initiative, which Norway is a part of.<sup>1,2</sup> Norway has  
61 a national quality indicator system for monitoring and comparing hospital performance, however,  
62 not all areas of hospital performance are covered by existing national quality indicators. While there  
63 are quality indicators for outcomes such as mortality and process measures such as waiting times,  
64 complications following hospital care is less explored, which is especially relevant following surgical  
65 procedures.

66 Postoperative wound dehiscence (PWD) rates after open abdominal surgery (laparotomies) was  
67 introduced as a patient safety indicator in the United States and later as a quality indicator by  
68 OECD.<sup>3-6</sup> Norway reported the second highest numbers for 2014-2015, with a PWD rate of 1.02%. The  
69 overall range was 0.055% to 1.05%.<sup>5</sup> Neighbouring Sweden, with comparable population health and  
70 health care, reported 0.30%. Moreover, a recent study comparing adverse events in Norway and  
71 Sweden found significantly higher adverse event rates of surgical complications in Norwegian  
72 hospitals, compared to Swedish hospitals.<sup>7</sup>

73 PWD is a serious complication that leads to higher mortality rates, higher implicit, explicit and social  
74 costs as well as increased readmission rates.<sup>8,9</sup> The PWD rate has been studied elsewhere as a quality  
75 indicator for hospitals, and found to have a high positive predictive value.<sup>10,11</sup> It is useful as a quality  
76 indicator, since several of the risk factors are modifiable and within control of the hospital and  
77 surgical team. There are few events per hospital, making it challenging to identify outlier hospitals for  
78 quality improvement because of the high statistical uncertainty.

1  
2  
3 79 Previous research has identified a number of risk factors for PWD. Examples of such factors are: (I)  
4  
5 80 patient related variables and comorbidities: smoking<sup>12</sup>, obesity<sup>13</sup>, chronic pulmonary disease, renal  
6  
7 81 insufficiency or diabetes<sup>14</sup> and use of immunosuppressive agents<sup>15 16</sup>; (II) procedure related factors:  
8  
9 82 operation type<sup>9 17</sup>, type of incision and closure<sup>18-20</sup> and length of operation time<sup>21</sup>; (III) postoperative  
10  
11 83 parameters: clean wound classification<sup>21</sup>, coughing<sup>9</sup> and wound infection<sup>9 14</sup>; (IV) operative scenario:  
12  
13  
14 84 e.g. qualifications of the surgeon<sup>21-23</sup> and of the perioperative team, and whether the surgery is  
15  
16 85 emergent.<sup>9 13</sup>

17  
18  
19  
20 86 The objectives of this study are to study the occurrence and variation of PWD after laparotomy at  
21  
22 87 Norwegian hospitals, and the potential usefulness of a PWD indicator for the Norwegian health care  
23  
24 88 system, computed from patient administrative data. More specifically we aimed to 1) investigate the  
25  
26 89 possibility to identify hospitals with higher or lower laparotomy PWD rate than average, after  
27  
28 90 appropriate risk adjustment, 2) study the variability of the PWD rate among hospitals, and its relation  
29  
30 91 to hospital type and laparotomy volume.  
31  
32  
33  
34  
35

## 36 92 MATERIAL AND METHODS

37  
38  
39  
40 93 Patient administrative data from all Norwegian hospitals were provided by the Norwegian Patient  
41  
42 94 Registry (NPR) for the period 2011-2015.<sup>24</sup> This comprised individual patient data from all  
43  
44 95 department stays: type of admission (acute or elective), primary and secondary diagnosis codes  
45  
46 96 according to the Norwegian version<sup>25</sup> of ICD-10, surgical and medical procedures, age, gender, date  
47  
48 97 and time of ward admission and discharge. Surgical procedures and operations were coded according  
49  
50 98 to the Norwegian version of the NOMESCO Classification of Surgical Procedures (NCSP-N).<sup>26</sup>  
51  
52  
53 99 Procedure time and date were not available. It was therefore not possible to exclude reclosures of  
54  
55 100 wounds occurring before or on the same day as laparotomies within the same episode, as requested  
56  
57 101 in the OECD indicator specification. The NPR data files were checked for missing values and  
58  
59 102 inconsistencies between variables, such as date and time of discharge before admission or invalid

1  
2  
3 103 ICD-10 code. We had no access to clinical data, such as e.g. type of suture, which would have enabled  
4  
5 104 us to study the causes of the reported dehiscences.  
6  
7  
8

9 105 Wound dehiscence was defined as the occurrence of a code for a reclosure operation, i.e. a  
10  
11 106 reoperation for wound dehiscence. This excludes superficial dehiscences, as these are usually not  
12  
13 107 resutured, and the code for reclosure operation is restricted to deep wound dehiscences.  
14

15 108 Laparotomies and wound reclosure operations were identified according to procedure codes. An  
16  
17 109 operation coded with a laparotomy code, signifies an incision into the abdominal wall, through the  
18  
19 110 fascia and with an opening of the abdominal cavity. Laparoscopic and endoscopic procedures were  
20  
21 111 not included. Details of the codes used can be found in the online supplement.  
22  
23  
24  
25

26 112 All permanent residents in Norway have a Personal Identification Number (PIN), registered in the  
27  
28 113 NPR. NPR prepared an encrypted PIN for all patients with a valid PIN, allowing tracking of patients  
29  
30 114 over time and between hospitals. The data were linked with the National Registry to provide data of  
31  
32 115 death (when applicable), using the PIN.  
33  
34  
35

36 116 Ward admissions for each patient, at more than one hospital in case of transfers, were linked into  
37  
38 117 episodes of care when less than eight hours elapsed from time of discharge to the next ward  
39  
40 118 admission.<sup>27</sup> An episode was regarded as acute if the first admission in the episode was coded as  
41  
42 119 non-elective, as a laparotomy episode if it included any procedure code for laparotomy (reclosures  
43  
44 120 not included), and a reclosure episode if a reclosure code was found. The initial data set consisted of  
45  
46 121 all laparotomy and reclosure episodes. Each reclosure episode was linked to the laparotomy episode  
47  
48 122 immediately preceding or coinciding with it. Reclosure episodes with no preceding laparotomy  
49  
50 123 episode within 30 days, as well as laparotomy or reclosure episodes following a reclosure episode  
51  
52 124 within 30 days, were excluded. Note that the linking of laparotomies and reclosures was not part of  
53  
54 125 the original OECD specification, but is required in order to attribute PWD to hospitals and to enable  
55  
56 126 risk adjustment. Following the OECD specification, laparotomy episodes (and consequently any  
57  
58  
59  
60



1  
2  
3 127 linked reclosure episodes) were excluded if a diagnosis code for immunocompromised state or  
4  
5 128 relating to pregnancy, childbirth and puerperium was present, if the length of stay was less than two  
6  
7 129 days, or if the patient's age was less than 15 years. Hospitals with less than 10 laparotomies over the  
8  
9  
10 130 five-year period were excluded. The hospitals belonged to one of three types: regional, large with  
11  
12 131 acute function and small with acute function. For details of the diagnosis and operation codes used,  
13  
14 132 see the online supplement. For risk adjustment, Charlson comorbidities were determined from  
15  
16 133 previous admissions three years prior to, but not including the current episode of care.<sup>27-29</sup> Diagnoses  
17  
18 134 were grouped according to the Clinical Condition Summary system (CCS), adapted to the Norwegian  
19  
20  
21 135 version of ICD-10.<sup>30</sup>

## 25 136 **Statistical methods**

26  
27  
28 137 Risk adjusted probabilities for a laparotomy episode resulting in a reclosure operation were  
29  
30 138 estimated by bias corrected logistic regression.<sup>31</sup> The final model was fit by stepwise regression with  
31  
32 139 the BIC criterion, allowing for potential two-way interactions.

33  
34  
35  
36  
37 140 To identify outlier hospitals, i.e. those with high or low risk adjusted PWD probabilities, estimated  
38  
39 141 hospital effects were compared to a reference value, defined as the 25% trimmed mean of the  
40  
41 142 hospital effects on the logistic scale.<sup>32</sup> As some hospitals reported zero reclosures, ordinary maximum  
42  
43 143 likelihood estimates of the model parameters do not exist, due to separation<sup>33</sup>, and the estimated  
44  
45 144 variances of the fitted parameters, based on their asymptotic distribution, become unreliable. The  
46  
47 145 comparison used an exact test based on the Poisson binomial distribution for the number of PWDs  
48  
49 146 per hospital, using the estimated probabilities for each case, together with parametric bootstrapping  
50  
51 147 to account for the estimation uncertainty in the model parameters. Tests for significance were  
52  
53 148 corrected for multiple comparisons using the Guo-Romano method<sup>34</sup>, and outlier status assigned  
54  
55 149 according to the false discovery rate (FDR). An FDR not exceeding 5% was regarded as significant. For  
56  
57 150 sensitivity analysis, two alternative risk adjustment models were tested, with either a four-category  
58  
59  
60

1  
2  
3 151 grouping of procedures, or with diagnosis categories, instead of the 13-category procedure grouping.  
4

5 152 In addition, a model with the four Norwegian hospital regions was also estimated.  
6  
7

8  
9 153 Hospital volume, modelled by splines<sup>35</sup>, was tested for inclusion in the model. We also performed  
10

11 154 this test after exclusion of hospitals with zero reclosures.  
12  
13

14  
15 155 Finally, the hospital specific effects were modelled as a mixture of two normal distributions. The  
16

17 156 expectation-maximization (EM) algorithm was used, taking into account the estimation variances.  
18

19 157 The mixture model yielded estimates of the quartiles of the hospital odds ratios and the scaled  
20

21 158 interquartile range (normalized by dividing by 1.349, to give the standard deviation in the case of a  
22

23 159 normal distribution) was computed as a measure of spread among hospitals. Bootstrapping of the  
24

25 160 mixture model was used to find a 95% confidence interval for the scaled interquartile range.  
26  
27  
28  
29

## 30 161 Risk adjustment

31  
32  
33 162 The following case-mix variables were included as candidates in the stepwise regression: age, gender,  
34

35 163 indicators for the individual Charlson comorbidities, number of previous hospital admissions two  
36

37 164 years prior to current admission, and whether the episode was acute or elective. A linear trend in  
38

39 165 admission year was also included. Age was modelled by natural splines with knots at the median and  
40

41 166 quartiles.<sup>35</sup> Based on previous studies of risk factors<sup>9,17</sup>, procedures were categorized into 13 types,  
42

43 167 according to the body system or organ involved. The effects of operation types were normalized to  
44

45 168 have zero sum on the logistic scale.  
46  
47  
48  
49

50  
51 169 For a quality indicator, only characteristics of the patient when entering the hospital, are meaningful  
52

53 170 risk adjustment variables. No data were available for smoking, obesity or other patient or case  
54

55 171 characteristics such as nutritional status. There was no information about operation urgency beyond  
56

57 172 the status of the hospital admission or episode as elective or acute.  
58  
59  
60

## 173 Patient and Public Involvement

174 Patients were not involved in the planning, conduct or analysis of this study. The policy of the  
 175 Norwegian Institute of Public health is to publish hospital quality indicators, when they have been  
 176 successfully validated.

## 177 RESULTS

178 The initial data set comprised 96 102 episodes with laparotomy and 1 909 with a reclosure operation.  
 179 After restricting data to reclosures paired with a laparotomy within 30 days, 1 580 reclosures  
 180 remained. After exclusions for pregnancy, childbirth and puerperium or immunocompromised state,  
 181 age and LOS, 78 299 laparotomies remained. Lastly, hospitals with less than 10 laparotomies were  
 182 excluded, yielding a final data set with 66 925 unique patients, 78 086 laparotomies and 1 477  
 183 reclosures from 47 hospitals. Descriptive statistics for the dataset are shown in Table 1. The  
 184 operation types are tabulated in the online Supplement.

185 *Table 1. Descriptive statistics for final data set*

|                                                                           | PWD        | No PWD      |
|---------------------------------------------------------------------------|------------|-------------|
| Age, years, median (quartiles)                                            | 69 (61-78) | 65 (51-75)  |
| Gender, females, n (%)                                                    | 517 (35)   | 43 094 (56) |
| Acute laparotomy episode, n (%)                                           | 657 (44)   | 26 381 (34) |
| Main diagnosis for reclosure episode coded as PWD, n (%)                  | 45 (3.1)   | —           |
| Main diagnosis for reclosure episode coded as deep wound infection, n (%) | 274 (19)   | —           |
| Hospital type for laparotomy episodes                                     |            |             |
| Regional, n (%)                                                           | 545 (37)   | 28 104 (37) |
| Large with acute function, n (%)                                          | 810 (55)   | 40 291 (53) |
| Small with acute function, n (%)                                          | 122 (8.3)  | 8 214 (11)  |
| Comorbidities                                                             |            |             |
| Diabetes with complications, n (%)                                        | 18 (1.2)   | 893 (1.2)   |
| Chronic pulmonary disease, n (%)                                          | 196 (13)   | 5 147 (6.7) |
| Renal disease, n (%)                                                      | 66 (4.5)   | 2 716 (3.5) |

|                                                                   |            |              |
|-------------------------------------------------------------------|------------|--------------|
| 30 day mortality (laparotomy episode), %                          | 67 (4.5)   | 2 668 (3.5)  |
| Length of stay (LOS) laparotomy episode, days, median (quartiles) | 19 (11-29) | 7.4 (4.4-13) |
| Reclosure and matched laparotomy in same episode, n (%)           | 1 211 (82) | —            |
| Converted from laparoscopy or endoscopy to laparotomy, n (%)      | 12 (0.81)  | 578 (0.75)   |
| Robot assistance in laparotomy, n (%)                             | 3 (0.2)    | 404 (0.53)   |

186  
187 From 2011 to 2015, the annual volume of laparotomies decreased somewhat, from 16 730 to 14 419,  
188 while the proportion of acute laparotomies remained stable at around 35%.

189 The overall rate of PWD for the five-year period was 1.89%. Crude PWD rates varied from 0% to 5.1%  
190 among hospitals. After risk adjustment, the range was 0.1% - 5.4%. Table 2 shows the odds ratios of  
191 the final logistic regression model. No interactions were included. The model showed good fit  
192 according to the modified Hosmer-Lemeshow test<sup>36</sup> (p=0.53) and good predictive ability, with an area  
193 under the operating characteristic (c-statistic) of 0.73.

194 *Table 2. Final multivariate logistic model for risk adjustment*

| Variable                                | Adjusted odds ratio | (95% confidence interval) |
|-----------------------------------------|---------------------|---------------------------|
| Year of admission                       | 0.93                | (0.90-0.96)               |
| Age, spline function                    |                     |                           |
| 40 (reference)                          | 1.00                |                           |
| 50                                      | 1.37                | (1.25-1.49)               |
| 60                                      | 1.97                | (1.65-2.36)               |
| 70                                      | 2.39                | (1.97-2.90)               |
| Gender                                  |                     |                           |
| Female (reference)                      | 1                   |                           |
| Male                                    | 2.42                | (2.16-2.72)               |
| Elective laparotomy episode (reference) | 1                   |                           |
| Acute laparotomy episode                | 1.36                | (1.21-1.52)               |
| Chronic pulmonary disease               | 1.72                | (1.47-2.01)               |
| Operation type <sup>a</sup>             |                     |                           |
| Exploratory laparotomy                  | 2.40                | (1.78-3.24)               |
| Hernia (diaphragmal)                    | 2.57                | (1.37-4.81)               |
| Thoracoabdominal aorta                  | 2.08                | (0.85-5.09)               |
| Gastrointestinal tract                  | 2.04                | (1.69-2.46)               |
| Liver                                   | 1.14                | (0.69-1.87)               |

|                                            |      |             |
|--------------------------------------------|------|-------------|
| Biliary tract                              | 0.12 | (0.05-0.28) |
| Pancreas                                   | 0.79 | (0.40-1.58) |
| Spleen                                     | 1.20 | (0.45-3.24) |
| Other digestive system                     | 1.46 | (1.03-2.07) |
| Kidney                                     | 0.09 | (0.03-0.28) |
| Other urinary and male genital organs      | 0.52 | (0.37-0.71) |
| Female genital organs                      | 1.43 | (1.06-1.92) |
| Peripheral vascular surgery                | 1.21 | (0.93-1.57) |
| More than one type of surgery <sup>b</sup> | 2.58 | (2.12-3.15) |
| Hospital                                   |      |             |
| Scaled interquartile range                 | 0.30 | (0.23-0.34) |

195 <sup>a</sup> Odds ratios for operation type is scaled to have geometric mean

21 196 <sup>b</sup> Not counting exploratory laparotomy

23 197

26 198 In Figure 1, risk-adjusted PWD rates are shown for each hospital, plotted versus laparotomy volume  
28  
29 199 and hospital type.

32 200 After significance testing, we identified three hospitals with higher PWD and none with lower PWD  
34  
35 201 than average, when correcting for multiple testing. Without multiple test correction, one additional  
36  
37 202 hospital with high PWD was found to be marginally significant ( $p=0.053$ ).

41 203 In the alternative model including volume, the PWD increased with yearly laparotomy volume from a  
42  
43 204 very low level up to 120 laparotomies per year, after which it remained fairly constant, see Figure 1.  
44  
45 205 The effect of volume was significant ( $p<0.001$ ), also after exclusion of the four smallest volume  
46  
47 206 hospitals with zero reclosures ( $p=0.008$ ). Hospital type coincided almost completely with a grouping  
48  
49 207 of hospitals by volume, and was therefore not tested separately. There was significant variation  
50  
51 208 among regions ( $p<0.001$ ), with the Northern region having the highest and the South-Eastern region  
52  
53 209 the lowest rates. Details can be found in the online supplement. Using diagnosis categories or  
54  
55 210 aggregated operation type as risk adjustment variables resulted in very small changes in risk adjusted  
56  
57 211 PWD rates.  
58  
59  
60

## 212 DISCUSSION

213 We have studied wound dehiscence after laparotomy, as a quality indicator based on the OECD  
214 specification, and found that it discriminated between Norwegian hospitals. The indicator was risk  
215 adjusted for differences in age, gender, comorbidity and type of surgery, and showed little sensitivity  
216 to changes in the set of risk adjustment variables. The overall PWD rate was 1.89%. After risk  
217 adjustment, the hospitals' PWD rate varied between 0.1% and 5.4%. Laparotomy volume and type of  
218 hospital had little effect on the PWD rate, except for hospitals with very low volume. Advanced age,  
219 male gender, chronic pulmonary disease, and emergency laparotomy were all significant risk factors  
220 for PWD. There were significant PWD differences according to the organ system targeted. The overall  
221 rate of PWD showed a small but statistically significant decline over the observation period 2011-  
222 2015. The relatively large variation of PWD rates between hospitals, after correction for patient  
223 characteristics and operation type, indicates possible variation in the quality of healthcare among  
224 hospitals. This may be due to variation in surgical technique and perioperative care, as well as the  
225 handling of postoperative complications, such as wound infection, which is known to be a risk factor  
226 for PWD.<sup>17</sup> We found PWD rates well within the range reported in international studies.<sup>9 13 14 17 21 37 38</sup>  
227 Also, the risk factors identified are in accordance with previous studies, albeit limited to  
228 administrative data. Laparotomy volume has negligible effect apart from the few hospitals with very  
229 low volume. A Japanese study reported a similar conclusion, while volume was found to have effect  
230 in US hospitals.<sup>39 40</sup> The effect is likely a result of the types of operations performed at the low-  
231 volume hospitals, compared with the other hospitals.

232 Our study is based on complete data from all Norwegian hospitals performing laparotomies. It was  
233 possible to track patients during transfers and reoperations at different hospitals. To the best of our  
234 knowledge, no similar study has been performed. NPR, the data source, has been validated for  
235 several disease categories with respect to identification of cases based on diagnoses and/or

1  
2  
3 236 procedures, and found to have a very high degree of completeness, compared to Norwegian national  
4  
5 237 medical quality registries.<sup>41-44</sup> At the time of writing, the completeness of NPR, after 24 registries  
6  
7 238 have been studied, ranges from 83.5% to 99.8%.<sup>24</sup>  
8  
9

10  
11 239 We cannot exclude a residual imbalance in case mix, affecting PWD through e.g. smoking or obesity,  
12  
13 240 which are known risk factors. There is regional variation in the prevalence of smoking and obesity in  
14  
15 241 Norway.<sup>45</sup> Obesity is more prevalent in Northern Norway, where PWD rates are somewhat higher.  
16  
17 242 However, in some other areas where obesity is less prevalent, the rates are similar. There is no  
18  
19 243 consistent correspondence between the known variation in smoking among counties and PWD rates.  
20  
21 244 Some surgical procedures are performed only at regional hospitals, and it is therefore possible that  
22  
23 245 selection effects are present. In that case, one would expect larger changes in PWD rates after risk  
24  
25 246 adjustment for operation type, which was not found. One potential source of error in our study is the  
26  
27 247 completeness and correctness of coding in the NPR, particularly the coding of reclosure operations.  
28  
29 248 The risk adjustment depends on data from previous hospitalization and may not capture all  
30  
31 249 comorbidities. Moreover, selection effects cannot not be ruled out. Differing policies for operations  
32  
33 250 on patients with known risk factors, e.g. obesity or smoking, would likely cause variation in PWD  
34  
35 251 rates. Patients who die before reoperation or are managed by other means will not be registered.  
36  
37 252 We believe that this applies to very few patients and would not influence our results. No attempt  
38  
39 253 was made to identify main operation or operation intent, as this would require a classification effort  
40  
41 254 outside the scope of the present study. No clinical details about surgical technique and patient  
42  
43 255 condition were available. Therefore, the causes of the observed PWD rate variation could not be  
44  
45 256 investigated.  
46  
47  
48  
49  
50  
51

52  
53 257 Previous studies have shown that the quality indicator has high positive predictive value, but only  
54  
55 258 moderate sensitivity.<sup>10 46 47</sup> Since we have used specific wound reclosure codes, similar to those used  
56  
57 259 in previous studies, we expect a high positive predictive value in Norway as well. Conceivably, the  
58  
59 260 sensitivity depends on the coding system, in particular the various alternative codes related to  
60

1  
2  
3 261 complications. Sensitivity in Norway may thus differ from that of other healthcare systems. A recent  
4  
5 262 retrospective medical record study from neighbouring Sweden reports that 86.9% of wound  
6  
7 263 dehiscences were reoperated.<sup>38</sup> Norway has an activity-based system for financing hospitals, which is  
8  
9 264 an incentive to report all reclosure operations.  
10  
11  
12

## 13 265 **Conclusions**

14  
15 266 Among Norwegian hospitals, there is a significant variation in PWD rate after laparotomies that  
16  
17 267 cannot be explained by operation type, age, comorbidity or whether the admission was elective or  
18  
19 268 acute. This warrants further investigation into possible causes, such as patient related factors,  
20  
21 269 surgical technique, perioperative procedures or handling of complications, e.g. wound infections.  
22  
23 270 Some of these factors are known to be amenable.<sup>20 48</sup> The relatively large between-hospital variation  
24  
25 271 found in the present study is an indication of potential for improvement. The risk adjusted PWD rate  
26  
27 272 after laparotomy is a candidate for use as a quality indicator for Norwegian hospitals, and will make it  
28  
29 273 possible to identify hospitals with apparent quality problems. To achieve sufficient discrimination,  
30  
31 274 however, five-year data are desirable, making it more difficult to monitor changes in hospital  
32  
33 275 performance resulting from quality improvement efforts. It lies outside the scope of the present  
34  
35 276 study to perform a comprehensive validation of the PWD rate as a quality indicator suitable for  
36  
37 277 public reporting. There are uncertainties and potential biases in the indicator, implying that it must  
38  
39 278 be regarded as a signal for follow-up within hospitals, rather than giving a final verdict of inferior or  
40  
41 279 superior quality. For reporting on surgical quality, several indicators should be used to give a  
42  
43 280 balanced view of the different aspects of quality and patient safety.  
44  
45  
46  
47  
48  
49  
50  
51  
52  
53  
54  
55  
56  
57  
58  
59  
60



## 281 FOOTNOTES

### 282 Funding

283 This research did not receive any grants from any funding agency in the public, commercial or not-  
284 for-profit sectors.

### 285 Competing interests

286 The authors have no competing interests.

### 287 Authors' contributions

288 AKL and OT conceived the study. DTK, TMH, OT, and SH participated in data preparation. OT, SH and  
289 AKL contributed to the analysis. OT helped draft the manuscript. JH was responsible for the statistical  
290 analysis and final manuscript. All authors revised and approved the final manuscript.

### 291 Ethics approval

292 The study was approved by the Norwegian Directorate of Health and the Norwegian Data Protection  
293 Authority.

### 294 Data sharing

295 The data set contains indirectly identifiable personal data, and cannot be shared without express  
296 permission from the Norwegian Patient Registry. For further information, contact the corresponding  
297 author.

298 *Figure 1. Risk adjusted PWD rates versus yearly laparotomy volume, by hospital type. Trend*  
 299 *curve is obtained by smoothing the scatterplot. Significance testing is adjusted for multiple*  
 300 *comparisons*

## 301 REFERENCES

- 302
- 303
- 304 1. Carinci F, Van Gool K, Mainz J, et al. Towards actionable international comparisons of health  
 305 system performance: expert revision of the OECD framework and quality indicators. *Int J*  
 306 *Qual Health Care* 2015;27(2):137-46. doi: 10.1093/intqhc/mzv004 [published Online First:  
 307 2015/03/12]
- 308 2. OECD. Health Care Quality and Outcomes: OECD; 2018 [Available from:  
 309 <http://www.oecd.org/health/health-systems/health-care-quality-and-outcomes.htm>  
 310 accessed 2018-06-06 2018.
- 311 3. Hannan EL. Using mortality data for profiling hospital quality of care and targeting substandard  
 312 care. *J Soc Health Syst* 1989;1(1):31-48.
- 313 4. Miller MR, Elixhauser A, Zhan C, et al. Patient Safety Indicators: using administrative data to  
 314 identify potential patient safety concerns. *Health Serv Res* 2001;36(6 Pt 2):110-32. [published  
 315 Online First: 2005/09/09]
- 316 5. OECD. Health Care Quality Indicators - Patient Safety 2018 [Available from:  
 317 <http://www.oecd.org/health/health-systems/hcqi-patient-safety.htm> accessed 2018-06-06  
 318 2018.
- 319 6. OECD. Definitions for Health Care Quality Indicators 2016-2017 HCQI Data Collection: OECD,  
 320 2016:113.
- 321 7. Deilkas ET, Risberg MB, Haugen M, et al. Exploring similarities and differences in hospital adverse  
 322 event rates between Norway and Sweden using Global Trigger Tool. *BMJ open*  
 323 2017;7(3):e012492. doi: 10.1136/bmjopen-2016-012492
- 324 8. Hannan EL, Bernard HR, O'Donnell JF, et al. A methodology for targeting hospital cases for quality  
 325 of care record reviews. *Am J Public Health* 1989;79(4):430-6.
- 326 9. van Ramshorst GH, Nieuwenhuizen J, Hop WC, et al. Abdominal wound dehiscence in adults:  
 327 development and validation of a risk model. *World J Surg* 2010;34(1):20-7. doi:  
 328 <https://dx.doi.org/10.1007/s00268-009-0277-y>
- 329 10. Romano PS, Mull HJ, Rivard PE, et al. Validity of selected AHRQ patient safety indicators based on  
 330 VA National Surgical Quality Improvement Program data. *Health Serv Res* 2009;44(1):182-  
 331 204. doi: <https://dx.doi.org/10.1111/j.1475-6773.2008.00905.x>
- 332 11. Rosen AK, Itani KM, Cevasco M, et al. Validating the patient safety indicators in the Veterans  
 333 Health Administration: do they accurately identify true safety events? *Med Care*  
 334 2012;50(1):74-85. doi: <https://dx.doi.org/10.1097/MLR.0b013e3182293edf>
- 335 12. Kean J. The effects of smoking on the wound healing process. *J Wound Care* 2010;19(1):5-8. doi:  
 336 10.12968/jowc.2010.19.1.46092
- 337 13. Shanmugam VK, Fernandez SJ, Evans KK, et al. Postoperative wound dehiscence: Predictors and  
 338 associations. *Wound Repair Regen* 2015;23(2):184-90. doi:  
 339 <https://dx.doi.org/10.1111/wrr.12268>
- 340 14. Sandy-Hodgetts K, Carville K, Leslie GD. Determining risk factors for surgical wound dehiscence: a  
 341 literature review. *Int Wound J* 2015;12(3):265-75. doi: 10.1111/iwj.12088

1  
2  
3  
4  
5  
6  
7  
8  
9  
10  
11  
12  
13  
14  
15  
16  
17  
18  
19  
20  
21  
22  
23  
24  
25  
26  
27  
28  
29  
30  
31  
32  
33  
34  
35  
36  
37  
38  
39  
40  
41  
42  
43  
44  
45  
46  
47  
48  
49  
50  
51  
52  
53  
54  
55  
56  
57  
58  
59  
60

15. Roine E, Bjork IT, Oyen O. Targeting risk factors for impaired wound healing and wound complications after kidney transplantation. *Transplant Proc* 2010;42(7):2542-6. doi: <https://dx.doi.org/10.1016/j.transproceed.2010.05.162>
16. Stephan RN, Munschauer CE, Kumar MS. Surgical wound infection in renal transplantation: outcome data in 102 consecutive patients without perioperative systemic antibiotic coverage. *Arch Surg* 1997;132(12):1315-8; discussion 18-9.
17. Sorensen LT, Hemmingsen U, Kallehave F, et al. Risk factors for tissue and wound complications in gastrointestinal surgery. *Ann Surg* 2005;241(4):654-8.
18. Mahey RG, Smruti; Rajpurohit, Jitesh; Desai, Desai; Suryawanshi, Sachin;. A prospective study of risk factors for abdominal wound dehiscence. *International Surgery Journal* 2017;4(1):24-28. doi: <http://dx.doi.org/10.18203/2349-2902.isj20163983>
19. Deerenberg EB, Harlaar JJ, Steyerberg EW, et al. Small bites versus large bites for closure of abdominal midline incisions (STITCH): a double-blind, multicentre, randomised controlled trial. *Lancet* 2015;386(10000):1254-60. doi: 10.1016/s0140-6736(15)60459-7 [published Online First: 2015/07/21]
20. Israelsson LA, Millbourn D. Prevention of Incisional Hernias: How to Close a Midline Incision. *Surg Clin North Am* 2013;93(5):1027-40. doi: <https://doi.org/10.1016/j.suc.2013.06.009>
21. Webster C, Neumayer L, Smout R, et al. Prognostic models of abdominal wound dehiscence after laparotomy. *J Surg Res* 2003;109(2):130-7.
22. Bucknall TE, Cox PJ, Ellis H. Burst abdomen and incisional hernia: a prospective study of 1129 major laparotomies. *Br Med J (Clin Res Ed)* 1982;284(6320):931-3. [published Online First: 1982/03/27]
23. Gislason H, Soreide O, Viste A. Wound complications after major gastrointestinal operations. The surgeon as a risk factor. *Dig Surg* 1999;16(6):512-4. doi: 10.1159/000018778
24. Health NDo. Norsk pasientregister - innhold og kvalitet: Norwegian Directorate of Health; 2018 [Available from: <https://helsedirektoratet.no/norsk-pasientregister-npr/innhold-og-kvalitet> accessed 2018-12-06 2018.
25. eHealth NDo. Helsefaglige kodeverk: Norwegian Directorate of eHealth 2018 [Available from: <https://ehelse.no/standarder-kodeverk-og-referanse katalog/helsefaglige-kodeverk> accessed 2018-06-06 2018.
26. Norwegian Directorate of eHealth. NCMP, NCSP og NCRP: Klassifikasjon av medisinske, kirurgiske og radiologiske prosedyrer Norwegian Directorate of eHealth; 2018 [Available from: <https://finnkode.ehelse.no/#ncmpncsp/0/0/0/-1> accessed 15th May 2018.
27. Hassani S, Lindman AS, Kristoffersen DT, et al. 30-Day Survival Probabilities as a Quality Indicator for Norwegian Hospitals: Data Management and Analysis. *PLoS One* 2015;10(9):e0136547. doi: 10.1371/journal.pone.0136547
28. Quan HD, Sundararajan V, Halfon P, et al. Coding algorithms for defining comorbidities in ICD-9-CM and ICD-10 administrative data. *Med Care* 2005;43(11):1130-39. doi: DOI 10.1097/01.mlr.0000182534.19832.83
29. Quan H, Li B, Couris CM, et al. Updating and validating the Charlson comorbidity index and score for risk adjustment in hospital discharge abstracts using data from 6 countries. *Am J Epidemiol* 2011;173(6):676-82. doi: 10.1093/aje/kwq433
30. (HCUP) HCaUP. Beta Clinical Classifications Software (CCS) for ICD-10-CM/PCS: Agency for Healthcare Research and Quality; 2018 [Available from: <https://www.hcup-us.ahrq.gov/toolssoftware/ccs10/ccs10.jsp> accessed 2018-06-06 2018.
31. Firth D. Bias Reduction of Maximum-Likelihood-Estimates. *Biometrika* 1993;80(1):27-38. doi: DOI 10.1093/biomet/80.1.27
32. Kristoffersen DT, Helgeland J, Clench-Aas J, et al. Observed to expected or logistic regression to identify hospitals with high or low 30-day mortality? *PLoS One* 2018;13(4) doi: ARTN e0195248 10.1371/journal.pone.0195248
33. Albert A, Anderson JA. On the Existence of Maximum Likelihood Estimates in Logistic Regression Models. *Biometrika* 1984;71(1):1-10. doi: 10.2307/2336390

- 1  
2  
3 394 34. Guo W, Romano JP. On stepwise control of directional errors under independence and some  
4 395 dependence. *Journal of Statistical Planning and Inference* 2015;163:21-33. doi:  
5 396 <https://doi.org/10.1016/j.jspi.2015.02.009>  
6 397 35. Chambers JM, Hastie TJ, Eds. *Statistical models in S*. Pacific Grove: Wadsworth & Brooks/Cole  
7 398 1992.  
8 399 36. Paul P, Pennell ML, Lemeshow S. Standardizing the power of the Hosmer-Lemeshow goodness of  
9 400 fit test in large data sets. *Stat Med* 2013;32(1):67-80. doi: 10.1002/sim.5525  
10 401 37. Kenig J, Richter P, Lasek A, et al. The efficacy of risk scores for predicting abdominal wound  
11 402 dehiscence: a case-controlled validation study. *BMC Surg* 2014;14:65. doi: 10.1186/1471-  
12 403 2482-14-65  
13 404 38. Walming S, Angenete E, Block M, et al. Retrospective review of risk factors for surgical wound  
14 405 dehiscence and incisional hernia. *BMC Surg* 2017;17(1):19. doi: 10.1186/s12893-017-0207-0  
15 406 39. Kitazawa T, Matsumoto K, Fujita S, et al. Perioperative patient safety indicators and hospital  
16 407 surgical volumes. *BMC Res Notes* 2014;7:117. doi: 10.1186/1756-0500-7-117 [published  
17 408 Online First: 2014/03/04]  
18 409 40. Hernandez-Boussard T, Downey JR, McDonald K, et al. Relationship between Patient Safety and  
19 410 Hospital Surgical Volume. *Health Serv Res* 2012;47(2):756-69. doi: doi:10.1111/j.1475-  
20 411 6773.2011.01310.x  
21 412 41. Bakken IJ, Gystad SO, Christensen OO, et al. Comparison of data from the Norwegian Patient  
22 413 Register and the Cancer Registry of Norway. *Tidsskr Nor Laegeforen* 2012;132(11):1336-40.  
23 414 doi: 10.4045/tidsskr.11.1099 [published Online First: 2012/06/22]  
24 415 42. Hoiberg MP, Gram J, Hermann P, et al. The incidence of hip fractures in Norway -accuracy of the  
25 416 national Norwegian patient registry. *BMC Musculoskelet Disord* 2014;15:372. doi:  
26 417 10.1186/1471-2474-15-372 [published Online First: 2014/11/15]  
27 418 43. Oie LR, Madsbu MA, Giannadakis C, et al. Validation of intracranial hemorrhage in the Norwegian  
28 419 Patient Registry. *Brain and behavior* 2018;8(2):e00900. doi: 10.1002/brb3.900 [published  
29 420 Online First: 2018/02/28]  
30 421 44. Varndal T, Bakken IJ, Janszky I, et al. Comparison of the validity of stroke diagnoses in a medical  
31 422 quality register and an administrative health register. *Scandinavian journal of public health*  
32 423 2016;44(2):143-9. doi: 10.1177/1403494815621641 [published Online First: 2015/12/15]  
33 424 45. Health NIO. Public Health report: Norwegian Institute of Public Health; 2018 [Available from:  
34 425 <https://www.fhi.no/en/op/hin/> accessed 2018-06-06 2018.  
35 426 46. Cevasco M, Borzecki AM, McClusky DA, 3rd, et al. Positive predictive value of the AHRQ Patient  
36 427 Safety Indicator "postoperative wound dehiscence". *J Am Coll Surg* 2011;212(6):962-7. doi:  
37 428 <https://dx.doi.org/10.1016/j.jamcollsurg.2011.01.053>  
38 429 47. Borzecki AM, Cevasco M, Mull H, et al. Improving the identification of postoperative wound  
39 430 dehiscence missed by the Patient Safety Indicator algorithm. *Am J Surg* 2013;205(6):674-80.  
40 431 doi: <https://dx.doi.org/10.1016/j.amjsurg.2012.07.040>  
41 432 48. Berríos-Torres SI, Umscheid CA, Bratzler DW, et al. Centers for disease control and prevention  
42 433 guideline for the prevention of surgical site infection, 2017. *JAMA Surg* 2017;152(8):784-91.  
43 434 doi: 10.1001/jamasurg.2017.0904  
44  
45  
46  
47  
48  
49  
50 435  
51  
52  
53  
54  
55  
56  
57  
58  
59  
60

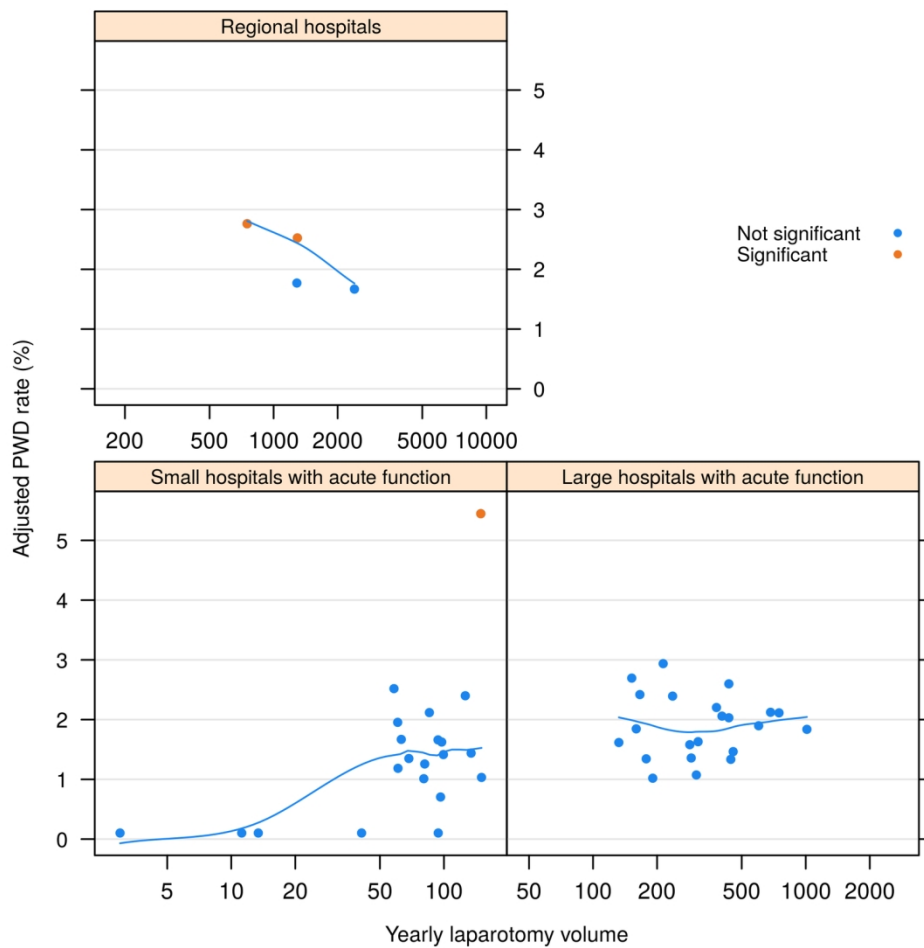

Figure 1. Risk adjusted PWD rates versus yearly laparotomy volume, by hospital type. Trend curve is obtained by smoothing the scatterplot. Significance testing is adjusted for multiple comparisons

149x149mm (300 x 300 DPI)

## Online supplement

*Table 1. Hospital types*

| Hospital type                       | Number |
|-------------------------------------|--------|
| Small hospitals with acute function | 21     |
| Large hospitals with acute function | 22     |
| Regional hospitals                  | 4      |

*Table 2. Laparotomy cases after operation type (primary episode)*

| Operation type                             | Frequency, n (%) |
|--------------------------------------------|------------------|
| Gastrointestinal tract                     | 30 404 (38.9)    |
| More than one type of surgery <sup>a</sup> | 14 051 (18.0)    |
| Female genital organs                      | 10 720 (13.7)    |
| Other urinary and male genital organs      | 6 536 (8.4)      |
| Peripheral vascular surgery                | 4 628 (5.9)      |
| Biliary tract                              | 2 739 (3.5)      |
| Other digestive system                     | 2 226 (2.9)      |
| Kidney                                     | 2 152 (2.8)      |
| Exploratory laparotomy                     | 2 061 (2.6)      |
| Liver                                      | 1 122 (1.4)      |
| Pancreas                                   | 775 (1.0)        |
| Hernia (diaphragmal)                       | 274 (0.4)        |
| Spleen                                     | 248 (0.3)        |
| Thoracoabdominal aorta                     | 150 (0.2)        |

<sup>a</sup>Not counting exploratory laparotomy

*Table 3. Effect of hospital region, after risk adjustment. Odds ratio standardized to have geometric mean one.*

| Hospital region             | Adjusted odds ratio (95% confidence interval) |
|-----------------------------|-----------------------------------------------|
| South-Eastern Norway Region | 0.85 (0.78 - 0.92)                            |
| Central Norway Region       | 0.99 (0.89 - 1.10)                            |
| Western Norway Region       | 1.06 (0.96 - 1.17)                            |
| Northern Norway Region      | 1.13 (1.001 - 1.27)                           |

*Postoperative wound dehiscence after laparotomy: a useful health care quality indicator? A cohort study based on Norwegian hospital administrative data*

## Diagnoses

Table 4. ICD-10 diagnosis codes contained in MDC 14 (Pregnancy, childbirth, and puerperium)

| Code  | Title                                                                                            |
|-------|--------------------------------------------------------------------------------------------------|
| A34   | Obstetrical tetanus                                                                              |
| F53.0 | Mild mental and behavioural disorders associated with the puerperium, not elsewhere classified   |
| F53.1 | Severe mental and behavioural disorders associated with the puerperium, not elsewhere classified |
| F53.8 | Other mental and behavioural disorders associated with the puerperium, not elsewhere classified  |
| F53.9 | Puerperal mental disorder, unspecified                                                           |
| Oxx.x | Pregnancy, childbirth and puerperium                                                             |
| Z32.0 | Pregnancy, not (yet) confirmed                                                                   |
| Z32.1 | Pregnancy confirmed                                                                              |
| Z33   | Pregnant state, incidental                                                                       |
| Z34.0 | Supervision of normal first pregnancy                                                            |
| Z34.8 | Supervision of other normal pregnancy                                                            |
| Z34.9 | Supervision of normal pregnancy, unspecified                                                     |
| Z35.0 | Supervision of pregnancy with history of infertility                                             |
| Z35.1 | Supervision of pregnancy with history of abortive outcome                                        |
| Z35.2 | Supervision of pregnancy with other poor reproductive or obstetric history                       |
| Z35.3 | Supervision of pregnancy with history of insufficient antenatal care                             |
| Z35.4 | Supervision of pregnancy with grand multiparity                                                  |
| Z35.5 | Supervision of elderly primigravida                                                              |
| Z35.6 | Supervision of very young primigravida                                                           |
| Z35.8 | Supervision of other high-risk pregnancies                                                       |
| Z35.9 | Supervision of high-risk pregnancy, unspecified                                                  |
| Z36.0 | Antenatal screening for chromosomal anomalies                                                    |
| Z36.1 | Antenatal screening for raised alpha-fetoprotein level                                           |
| Z36.2 | Other antenatal screening based on amniocentesis                                                 |
| Z36.3 | Antenatal screening for malformations using ultrasound and other physical methods                |
| Z36.4 | Antenatal screening for fetal growth retardation using ultrasound and other physical methods     |
| Z36.5 | Antenatal screening for isoimmunization                                                          |
| Z36.8 | Other antenatal screening                                                                        |
| Z36.9 | Antenatal screening, unspecified                                                                 |
| Z37.0 | Single live birth                                                                                |
| Z37.1 | Single stillbirth                                                                                |
| Z37.2 | Twins, both liveborn                                                                             |
| Z37.3 | Twins, one liveborn and one stillborn                                                            |
| Z37.4 | Twins, both stillborn                                                                            |
| Z37.5 | Other multiple births, all liveborn                                                              |
| Z37.6 | Other multiple births, some liveborn                                                             |
| Z37.7 | Other multiple births, all stillborn                                                             |
| Z37.9 | Outcome of delivery, unspecified                                                                 |
| Z39.0 | Care and examination immediately after delivery                                                  |
| Z39.1 | Care and examination of lactating mother                                                         |
| Z39.2 | Routine postpartum follow-up                                                                     |
| Z64.0 | Problems related to unwanted pregnancy                                                           |

*Postoperative wound dehiscence after laparotomy: a useful health care quality indicator? A cohort study based on Norwegian hospital administrative data*

For peer review only - <http://bmjopen.bmj.com/site/about/guidelines.xhtml>

Table 5. ICD-10 diagnosis codes for immunocompromised state

| Code  | Title                                                                                             |
|-------|---------------------------------------------------------------------------------------------------|
| B20.0 | HIV disease resulting in mycobacterial infection                                                  |
| B20.1 | HIV disease resulting in other bacterial infections                                               |
| B20.2 | HIV disease resulting in cytomegaloviral disease                                                  |
| B20.3 | HIV disease resulting in other viral infections                                                   |
| B20.4 | HIV disease resulting in candidiasis                                                              |
| B20.5 | HIV disease resulting in other mycoses                                                            |
| B20.6 | HIV disease resulting in Pneumocystis carinii pneumonia                                           |
| B20.7 | HIV disease resulting in multiple infections                                                      |
| B20.8 | HIV disease resulting in other infectious and parasitic diseases                                  |
| B20.9 | HIV disease resulting in unspecified infectious or parasitic disease                              |
| B21.0 | HIV disease resulting in Kaposi's sarcoma                                                         |
| B21.1 | HIV disease resulting in Burkitt's lymphoma                                                       |
| B21.2 | HIV disease resulting in other types of non-Hodgkin's lymphoma                                    |
| B21.3 | HIV disease resulting in other malignant neoplasms of lymphoid, haematopoietic and related tissue |
| B21.7 | HIV disease resulting in multiple malignant neoplasms                                             |
| B21.8 | HIV disease resulting in other malignant neoplasms                                                |
| B21.9 | HIV disease resulting in unspecified malignant neoplasm                                           |
| B22.0 | HIV disease resulting in encephalopathy                                                           |
| B22.1 | HIV disease resulting in lymphoid interstitial pneumonitis                                        |
| B22.2 | HIV disease resulting in wasting syndrome                                                         |
| B22.7 | HIV disease resulting in multiple diseases classified elsewhere                                   |
| B23.1 | HIV disease resulting in (persistent) generalized lymphadenopathy                                 |
| B23.2 | HIV disease resulting in haematological and immunological abnormalities, not elsewhere classified |
| B23.8 | HIV disease resulting in other specified conditions                                               |
| B24   | Unspecified human immunodeficiency virus [HIV] disease                                            |
| B59   | Pneumocystosis                                                                                    |
| D47.1 | Chronic myeloproliferative disease                                                                |
| D70   | Agranulocytosis                                                                                   |
| D71   | Functional disorders of polymorphonuclear neutrophils                                             |
| D72.0 | Genetic anomalies of leukocytes                                                                   |
| D80.0 | Hereditary hypogammaglobulinaemia                                                                 |
| D80.1 | Nonfamilial hypogammaglobulinaemia                                                                |
| D80.2 | Selective deficiency of immunoglobulin A [IgA]                                                    |
| D80.3 | Selective deficiency of immunoglobulin G [IgG] subclasses                                         |
| D80.4 | Selective deficiency of immunoglobulin M [IgM]                                                    |
| D80.5 | Immunodeficiency with increased immunoglobulin M [IgM]                                            |
| D80.6 | Antibody deficiency with near-normal immunoglobulins or with hyperimmunoglobulinaemia             |
| D80.7 | Transient hypogammaglobulinaemia of infancy                                                       |
| D80.8 | Other immunodeficiencies with predominantly antibody defects                                      |
| D80.9 | Immunodeficiency with predominantly antibody defects, unspecified                                 |
| D81.0 | Severe combined immunodeficiency [SCID] with reticular dysgenesis                                 |
| D81.1 | Severe combined immunodeficiency [SCID] with low T- and B-cell numbers                            |
| D81.2 | Severe combined immunodeficiency [SCID] with low or normal B-cell numbers                         |
| D81.3 | Adenosine deaminase [ADA] deficiency                                                              |
| D81.4 | Nezelof's syndrome                                                                                |
| D81.5 | Purine nucleoside phosphorylase [PNP] deficiency                                                  |
| D81.6 | Major histocompatibility complex class I deficiency                                               |
| D81.7 | Major histocompatibility complex class II deficiency                                              |
| D81.8 | Other combined immunodeficiencies                                                                 |
| D81.9 | Combined immunodeficiency, unspecified                                                            |
| D82.0 | Wiskott-Aldrich syndrome                                                                          |
| D82.1 | Di George's syndrome                                                                              |

Postoperative wound dehiscence after laparotomy: a useful health care quality indicator? A cohort study based on Norwegian hospital administrative data



| Code  | Title                                                                                          |
|-------|------------------------------------------------------------------------------------------------|
| D82.2 | Immunodeficiency with short-limbed stature                                                     |
| D82.3 | Immunodeficiency following hereditary defective response to Epstein-Barr virus                 |
| D82.4 | Hyperimmunoglobulin E [IgE] syndrome                                                           |
| D82.8 | Immunodeficiency associated with other specified major defects                                 |
| D82.9 | Immunodeficiency associated with major defect, unspecified                                     |
| D83.0 | Common variable immunodeficiency with predominant abnormalities of B-cell numbers and function |
| D83.1 | Common variable immunodeficiency with predominant immunoregulatory T-cell disorders            |
| D83.2 | Common variable immunodeficiency with autoantibodies to B- or T-cells                          |
| D83.8 | Other common variable immunodeficiencies                                                       |
| D83.9 | Common variable immunodeficiency, unspecified                                                  |
| D84.0 | Lymphocyte function antigen-1 [LFA-1] defect                                                   |
| D84.1 | Defects in the complement system                                                               |
| D84.8 | Other specified immunodeficiencies                                                             |
| D84.9 | Immunodeficiency, unspecified                                                                  |
| D89.8 | Other specified disorders involving the immune mechanism, not elsewhere classified             |
| D89.9 | Disorder involving the immune mechanism, unspecified                                           |
| E40   | Kwashiorkor                                                                                    |
| E41   | Nutritional marasmus                                                                           |
| E42   | Marasmic kwashiorkor                                                                           |
| E43   | Unspecified severe protein-energy malnutrition                                                 |
| I12.0 | Hypertensive renal disease with renal failure                                                  |
| I13.1 | Hypertensive heart and renal disease with renal failure                                        |
| I13.2 | Hypertensive heart and renal disease with both (congestive) heart failure and renal failure    |
| K91.2 | Postsurgical malabsorption, not elsewhere classified                                           |
| N18.0 | End-stage renal disease                                                                        |
| N18.5 | Chronic kidney disease, stage 5                                                                |
| N18.8 | Other chronic renal failure                                                                    |
| T86.0 | Bone-marrow transplant rejection                                                               |
| T86.1 | Kidney transplant failure and rejection                                                        |
| T86.2 | Heart transplant failure and rejection                                                         |
| T86.3 | Heart-lung transplant failure and rejection                                                    |
| T86.4 | Liver transplant failure and rejection                                                         |
| T86.8 | Failure and rejection of other transplanted organs and tissues                                 |
| T86.9 | Failure and rejection of unspecified transplanted organ and tissue                             |
| Y83.0 | Surgical Operation with transplant of whole organ or tissue                                    |
| Z49.0 | Preparatory care for dialysis                                                                  |
| Z49.1 | Extracorporeal dialysis                                                                        |
| Z49.2 | Other dialysis                                                                                 |
| Z94.0 | Kidney transplant status                                                                       |
| Z94.1 | Heart transplant status                                                                        |
| Z94.2 | Lung transplant status                                                                         |
| Z94.3 | Heart and lungs transplant status                                                              |
| Z94.4 | Liver transplant status                                                                        |
| Z94.8 | Other transplanted organ and tissue status                                                     |
| Z94.9 | Transplanted organ and tissue status, unspecified                                              |

*Postoperative wound dehiscence after laparotomy: a useful health care quality indicator? A cohort study based on Norwegian hospital administrative data*

For peer review only - <http://bmjopen.bmj.com/site/about/guidelines.xhtml>

## Operations

*Procedure codes for laparotomy and operation types.* Laparotomy codes are the total of codes in tables 6-19. Note that a last code digit of 0, 3 or 6 signifies an open or other non-endoscopic operation or procedure, except for peripheral vascular surgery.

*Table 6. NCSP-N codes for reclosure procedures*

| Code  | Title                                                                            |
|-------|----------------------------------------------------------------------------------|
| JWA00 | Repair of wound dehiscence in gastroenterological surgery                        |
| KWA00 | Repair of wound dehiscence in urological surgery                                 |
| LWA00 | Repair of wound dehiscence in gynaecological surgery                             |
| PWA00 | Repair of wound dehiscence in surgery of peripheral vessels and lymphatic system |

*Table 7. NCSP-N code for exploratory laparotomy and opening of abdominal cavity*

| Code  | Title                      |
|-------|----------------------------|
| JAA00 | Incision of abdominal wall |
| JAH00 | Laparotomy                 |
| JAH20 | Staging laparotomy         |
| JAH30 | Laparostomy                |
| JAH33 | Opening of laparostomy     |
| JAH40 | Thoracolumbarotomy         |

*Table 8. NCSP-N codes for diaphragmal hernia repair*

| Code  | Title                                     |
|-------|-------------------------------------------|
| JBB00 | Repair of paraoesophageal hernia          |
| JBB10 | Repair of congenital diaphragmatic hernia |
| JBB96 | Repair of other diaphragmatic hernia      |
| JBC00 | Gastro-oesophageal antireflux operation   |

*Table 9. NCSP-N codes for repair of thoracoabdominal aorta*

| Code  | Title                                                                   |
|-------|-------------------------------------------------------------------------|
| FCD00 | Suture of thoracoabdominal aorta                                        |
| FCD10 | Reinforcement of thoracoabdominal aorta using suture                    |
| FCD30 | Repair of thoracoabdominal aorta using patch                            |
| FCD40 | Partial resection and suture of thoracoabdominal aorta                  |
| FCD50 | Resection and reconstruction of thoracoabdominal aorta using tube graft |
| FCD60 | Resection of thoracoabdominal aorta and reimplantation of branches      |
| FCD70 | Bypass of thoracoabdominal aorta using tube graft                       |
| FCD80 | Removal of foreign body from thoracoabdominal aorta                     |
| FCD96 | Other repair of thoracoabdominal aorta                                  |

*Postoperative wound dehiscence after laparotomy: a useful health care quality indicator? A cohort study based on Norwegian hospital administrative data*

Table 10. NCSP-N codes for procedures on the gastrointestinal tract: oesophagus, stomach and intestines

| Code  | Title                                                                               |
|-------|-------------------------------------------------------------------------------------|
| JCB00 | Oesophagostomy                                                                      |
| JCC00 | Transhiatal partial oesophagectomy without interposition                            |
| JCC10 | Transthoracic partial oesophagectomy without interposition                          |
| JCC20 | Transhiatal partial oesophagectomy with interposition of intestine                  |
| JCC30 | Transthoracic partial oesophagectomy with interposition of intestine                |
| JCC96 | Other partial oesophagectomy                                                        |
| JCD00 | Subcutaneous anastomosis of oesophagus without interposition                        |
| JCD03 | Subcutaneous anastomosis of oesophagus with interposition of intestine              |
| JCD10 | Intrathoracic anastomosis of oesophagus without interposition                       |
| JCD13 | Intrathoracic oesophageal anastomosis with interposition of intestine               |
| JCD20 | Transsection of oesophagus                                                          |
| JCD96 | Other anastomosis of oesophagus without resection                                   |
| JCE00 | Suture of oesophagus                                                                |
| JCE10 | Plastic repair of stenosis of cardia                                                |
| JCE20 | Cardiomyotomy                                                                       |
| JCE30 | Repair of oesophageal atresia or congenital tracheo-oesophageal fistula             |
| JCE33 | Closure of acquired tracheo-oesophageal or broncho-oesophageal fistula              |
| JCE40 | Reconstruction of oesophagus using flap                                             |
| JCE50 | Reconstruction of oesophagus using free microvascular graft of intestine            |
| JCE96 | Other reconstruction of oesophagus                                                  |
| JCF00 | Insertion of oesophageal stent                                                      |
| JCW96 | Other operation on oesophagus                                                       |
| JDA00 | Gastrotomy                                                                          |
| JDA60 | Closure of perforated ulcer of stomach                                              |
| JDA63 | Local excision of lesion of stomach                                                 |
| JDB00 | Gastrostomy                                                                         |
| JDB10 | Percutaneous gastrostomy                                                            |
| JDC00 | Partial gastrectomy and gastroduodenostomy                                          |
| JDC10 | Partial gastrectomy and gastrojejunostomy                                           |
| JDC20 | Partial gastrectomy and Roux-en-Y reconstruction                                    |
| JDC30 | Partial gastrectomy with interposition of jejunum                                   |
| JDC40 | Partial gastrectomy and oesophagogastrostomy                                        |
| JDC96 | Partial gastrectomy with other reconstruction                                       |
| JDD00 | Total gastrectomy and Roux-en-Y oesophagojejunostomy                                |
| JDD96 | Total gastrectomy with other reconstruction                                         |
| JDE00 | Gastrojejunostomy                                                                   |
| JDE10 | Conversion of gastrojejunostomy to Roux-en-Y anastomosis                            |
| JDE20 | Conversion of gastrojejunostomy to gastroduodenostomy with interposition of jejunum |
| JDE96 | Other anastomosis of stomach without concurrent gastrectomy                         |
| JDF00 | Gastroplasty                                                                        |

Postoperative wound dehiscence after laparotomy: a useful health care quality indicator? A cohort study based on Norwegian hospital administrative data

For peer review only - <http://bmjopen.bmj.com/site/about/guidelines.xhtml>

| Code  | Title                                                                        |
|-------|------------------------------------------------------------------------------|
| JDF10 | Gastric bypass                                                               |
| JDF20 | Gastric banding                                                              |
| JDF96 | Other bariatric operation on stomach                                         |
| JDG00 | Truncal vagotomy                                                             |
| JDG10 | Proximal gastric vagotomy                                                    |
| JDG96 | Other vagotomy                                                               |
| JDH00 | Duodenotomy                                                                  |
| JDH40 | Duodenostomy on duodenal bulb                                                |
| JDH50 | Local excision of lesion of duodenal bulb                                    |
| JDH60 | Pyloromyotomy                                                                |
| JDH63 | Pyloroplasty                                                                 |
| JDH70 | Closure of perforated ulcer of duodenum                                      |
| JDW96 | Other operation on stomach or duodenum                                       |
| JEA00 | Appendectomy                                                                 |
| JEA10 | Appendectomy with drainage                                                   |
| JEW96 | Other operation on appendix                                                  |
| JFA00 | Enterotomy                                                                   |
| JFA10 | Colotomy                                                                     |
| JFA16 | Biopsy of wall of colon without colotomy                                     |
| JFA60 | Strictureplasty in small intestine                                           |
| JFA63 | Strictureplasty in colon                                                     |
| JFA70 | Suture of small intestine                                                    |
| JFA73 | Excision of lesion of small intestine                                        |
| JFA76 | Closure of fistula of small intestine                                        |
| JFA80 | Suture of colon                                                              |
| JFA83 | Excision of lesion of colon                                                  |
| JFA86 | Closure of fistula of colon                                                  |
| JFA96 | Other local operation on intestine                                           |
| JFB00 | Partial resection of small intestine                                         |
| JFB10 | Reversal of segment of small intestine                                       |
| JFB13 | Plastic repair of small intestine with lengthening                           |
| JFB20 | Ileocaecal resection                                                         |
| JFB30 | Right hemicolectomy                                                          |
| JFB33 | Other resection comprising small intestine and colon                         |
| JFB40 | Resection of transverse colon                                                |
| JFB43 | Left hemicolectomy                                                           |
| JFB46 | Resection of sigmoid colon                                                   |
| JFB50 | Other resection of colon                                                     |
| JFB53 | Resection of sigmoid colon sigmoideum with partial resection of rectum       |
| JFB60 | Resection of sigmoid colon with end colostomy                                |
| JFB63 | Other resection of colon with proximal colostomy and closure of distal stump |
| JFB96 | Other partial excision of intestine                                          |
| JFC00 | Entero-enterostomy                                                           |
| JFC10 | Ileotransversostomy                                                          |

*Postoperative wound dehiscence after laparotomy: a useful health care quality indicator? A cohort study based on Norwegian hospital administrative data*

For peer review only - <http://bmjopen.bmj.com/site/about/guidelines.xhtml>

| Code  | Title                                                                    |
|-------|--------------------------------------------------------------------------|
| JFC20 | Other enterocolostomy                                                    |
| JFC30 | Colo-colostomy                                                           |
| JFC40 | Ileorectostomy                                                           |
| JFC50 | Colorectostomy                                                           |
| JFD00 | Jejunioleal bypass                                                       |
| JFD03 | Duodenoileal bypass with biliopancreatic diversion                       |
| JFD10 | Revision of jejunioleal bypass                                           |
| JFD13 | Revision of duodenoileal bypass                                          |
| JFD20 | Restoration of continuity after jejunioleal bypass                       |
| JFD23 | Restoration of continuity after duodenoileal bypass                      |
| JFD96 | Other intestinal bypass operation                                        |
| JFE00 | Transplantation of small intestine                                       |
| JFE96 | Other operation relating to transplantation of small intestine           |
| JFF00 | Catheter enterostomy                                                     |
| JFF10 | Loop enterostomy                                                         |
| JFF13 | Terminal enterostomy                                                     |
| JFF16 | Conversion of ileoanal anastomosis to ileostomy                          |
| JFF20 | Caecostomy                                                               |
| JFF23 | Transversostomy                                                          |
| JFF26 | Sigmoidostomy                                                            |
| JFF30 | Other colostomy                                                          |
| JFF40 | Appendicostomy                                                           |
| JFF50 | Exteriorisation of loop of colon without opening                         |
| JFF60 | Opening of exteriorised loop of colon                                    |
| JFF96 | Other exteriorisation of intestine or creation of intestinal stoma       |
| JFG00 | Closure of loop enterostomy without resection                            |
| JFG10 | Closure of loop colostomy without resection                              |
| JFG20 | Closure of enterostomy with resection of exteriorised loop               |
| JFG23 | Closure of terminal enterostomy with anastomosis to small intestine      |
| JFG26 | Closure of terminal enterostomy with anastomosis to colon                |
| JFG30 | Closure of colostomy with resection of exteriorised loop                 |
| JFG33 | Closure of terminal colostomy with anastomosis to colon                  |
| JFG36 | Closure of terminal colostomy with anastomosis to rectum                 |
| JFG40 | Revision of enterostomy or colostomy without laparotomy                  |
| JFG50 | Laparotomy with revision of enterostomy or colostomy                     |
| JFG53 | Revision of ileal pelvic pouch                                           |
| JFG56 | Revision of colonic pelvic pouch                                         |
| JFG60 | Conversion of conventional ileostomy to continent ileostomy              |
| JFG70 | Conversion of continent ileostomy to conventional ileostomy              |
| JFG73 | Excision of ileal pelvic pouch                                           |
| JFG76 | Excision of colonic pelvic pouch with colorectal or coloanal anastomosis |
| JFG80 | Excision of ileal pouch with construction of new continent ileostomy     |
| JFG83 | Excision of colonic pelvic pouch and construction of new pouch           |
| JFG86 | Excision of ileal pelvic pouch and construction of new pouch             |

*Postoperative wound dehiscence after laparotomy: a useful health care quality indicator? A cohort study based on Norwegian hospital administrative data*

For peer review only - <http://bmjopen.bmj.com/site/about/guidelines.xhtml>

| Code  | Title                                                                                |
|-------|--------------------------------------------------------------------------------------|
| JFG96 | Other operation on intestinal stoma or pouch                                         |
| JFH00 | Total colectomy and ileorectal anastomosis                                           |
| JFH10 | Total colectomy and ileostomy                                                        |
| JFH20 | Proctocolectomy and ileostomy                                                        |
| JFH30 | Total colectomy, mucosal proctectomy and ileoanal anastomosis without ileostomy      |
| JFH33 | Total colectomy, mucosal proctectomy, ileoanal anastomosis and ileostomy             |
| JFH40 | Proctocolectomy and continent ileostomy                                              |
| JFH96 | Other total colectomy                                                                |
| JFJ00 | Coecopexy                                                                            |
| JFJ96 | Other enteropexy or colopexy                                                         |
| JFK00 | Division of adhesive band in intestinal obstruction                                  |
| JFK10 | Freeing of adhesions in intestinal obstruction                                       |
| JFK20 | Freeing of adhesions and plication of small intestine                                |
| JFK96 | Other operation on adhesions in intestinal obstruction                               |
| JFL00 | Open reduction of intussusception of intestine                                       |
| JFL10 | Laparotomy and manipulation of obstructed intestine                                  |
| JFL20 | Laparotomy and manipulation of impacted material                                     |
| JFL96 | Other operation for intestinal obstruction without resection or freeing of adhesions |
| JFW96 | Other operation on intestine                                                         |
| JGA00 | Proctotomy                                                                           |
| JGA60 | Suture of rectum                                                                     |
| JGA70 | Proctotomy and excision of lesion of rectum                                          |
| JGA96 | Other proctotomy or local operation on rectum                                        |
| JGB00 | Partial proctectomy and colorectal or coloanal anastomosis                           |
| JGB03 | Partial proctectomy with partial excision of mesorectum                              |
| JGB06 | Total mesorectal excision                                                            |
| JGB10 | Partial proctectomy and end colostomy                                                |
| JGB20 | Partial rectosigmoidectomy and abdominoperineal pull-through anastomosis             |
| JGB30 | Abdominoperineal excision of rectum                                                  |
| JGB33 | Abdominoperineal excision of rectum and intersphincter resection                     |
| JGB36 | Wide excision of rectum                                                              |
| JGB40 | Excision of rectum and end ileostomy                                                 |
| JGB50 | Mucosal proctectomy and ileoanal anastomosis                                         |
| JGB60 | Excision of rectum and ileoanal anastomosis                                          |
| JGB96 | Other proctectomy or excision of rectum                                              |
| JGC00 | Rectopexy                                                                            |
| JGC30 | Excision and suture of rectal mucosa with imbrication of muscular layer              |
| JGC96 | Other reconstructive operation on rectum                                             |
| JGW96 | Other operation on rectum                                                            |

Table 11. NCSP-N codes for procedures on the liver

| Code  | Title                                                        |
|-------|--------------------------------------------------------------|
| JJA00 | Exploration of liver                                         |
| JJA10 | Hepatotomy                                                   |
| JJA20 | Open biopsy of liver                                         |
| JJA23 | Open needle biopsy of liver                                  |
| JJA30 | Fenestration of cyst of liver                                |
| JJA40 | Excision of lesion of liver                                  |
| JJA43 | Destruction of lesion of liver                               |
| JJA50 | Suture of liver                                              |
| JJA96 | Other local operation on liver                               |
| JJB00 | Wedge resection of liver                                     |
| JJB10 | Atypical resection of liver                                  |
| JJB20 | Excision of single segment of liver                          |
| JJB30 | Excision of two segments of liver                            |
| JJB40 | Excision of segments II, III and IV of liver                 |
| JJB50 | Excision of segments V, VI, VII and VIII of liver            |
| JJB53 | Excision of segments IV,V, VI, VII and VIII of liver         |
| JJB60 | Other excision of three or more segments of liver            |
| JJB96 | Other resection of liver                                     |
| JJC00 | Allogenic transplantation of liver                           |
| JJC10 | Allogenic partial transplantation of liver                   |
| JJC20 | Allogenic partial transplantation of liver from living donor |
| JJC30 | Xenogenic transplantation of liver                           |
| JJC40 | Xenogenic partial transplantation of liver                   |
| JJC50 | Resection of transplanted liver                              |
| JJC60 | Total excision of transplanted liver                         |
| JJC96 | Other transplantation of liver or related operation          |
| JJW96 | Other operation on liver                                     |

Table 12. NCSP-N codes for procedures on biliary tract

| Code  | Title                                              |
|-------|----------------------------------------------------|
| JKA00 | Cholecystotomy                                     |
| JKA10 | Cholecystostomy                                    |
| JKA20 | Cholecystectomy                                    |
| JKA96 | Other operation on gallbladder                     |
| JKB00 | Incision of bile duct                              |
| JKB20 | Intraoperative cholangioscopy                      |
| JKB30 | Percutaneous transhepatic biliary drainage         |
| JKB40 | Suture of bile duct                                |
| JKB96 | Other incision or related operation on bile duct   |
| JKC00 | Incision of bile duct and local excision of lesion |
| JKC10 | Partial excision and anastomosis of bile duct      |

*Postoperative wound dehiscence after laparotomy: a useful health care quality indicator? A cohort study based on Norwegian hospital administrative data*

| Code  | Title                                                                            |
|-------|----------------------------------------------------------------------------------|
| JKC20 | Partial excision of bile duct and anastomosis to duodenum                        |
| JKC30 | Partial excision of bile duct and anastomosis to jejunum                         |
| JKC40 | Partial excision of right or left hepatic duct and anastomosis to jejunum        |
| JKC50 | Excision of papilla of Vater and anastomosis of bile duct to duodenum or jejunum |
| JKC96 | Other excision of bile duct                                                      |
| JKD00 | Anastomosis of gallbladder to jejunum                                            |
| JKD10 | Anastomosis of bile duct to duodenum                                             |
| JKD20 | Anastomosis of bile duct to jejunum                                              |
| JKD30 | Extrahepatic anastomosis of right or left hepatic duct to jejunum                |
| JKD40 | Anastomosis of intrahepatic bile duct to jejunum                                 |
| JKD50 | Hepatopertoenterostomy                                                           |
| JKD96 | Other biliodigestive anastomosis without excision                                |
| JKE00 | Transduodenal papillotomy                                                        |
| JKE06 | Transduodenal sphincteroplasty                                                   |
| JKE96 | Other transduodenal open operation on bile duct or ampulla of Vater              |
| JKF00 | Excision of cystic duct                                                          |
| JKF96 | Other secondary operation on biliary tract                                       |
| JKW96 | Other operation on biliary tract                                                 |

Table 13. NCSP-N codes for procedures on the pancreas

| Code  | Title                                                                   |
|-------|-------------------------------------------------------------------------|
| JLA00 | Exploration of pancreas                                                 |
| JLA10 | Biopsy of pancreas                                                      |
| JLB00 | Incision of pancreas                                                    |
| JLB10 | Pancreaticolithotomy                                                    |
| JLB96 | Other incision, drainage or dilatation of pancreas                      |
| JLC00 | Excision of lesion of pancreas                                          |
| JLC10 | Distal pancreatectomy                                                   |
| JLC20 | Total pancreatectomy                                                    |
| JLC30 | Pancreatoduodenectomy                                                   |
| JLC40 | Total pancreatoduodenectomy                                             |
| JLC50 | Atypical pancreatectomy                                                 |
| JLC96 | Other pancreatectomy                                                    |
| JLD00 | Pancreaticojejunostomy                                                  |
| JLD10 | Anastomosis of pancreatic pseudocyst to stomach                         |
| JLD20 | Anastomosis of pancreatic pseudocyst to jejunum                         |
| JLE00 | Allogenic total transplantation of pancreas with pancreaticocystostomy  |
| JLE03 | Allogenic total transplantation of pancreas with pancreaticoenterostomy |
| JLE10 | Allogenic segmental transplantation of pancreas                         |
| JLE16 | Allogenic segmental transplantation of pancreas from living donor       |
| JLE20 | Allogenic islet cell transplantation                                    |
| JLE30 | Xenogenic islet cell transplantation                                    |

*Postoperative wound dehiscence after laparotomy: a useful health care quality indicator? A cohort study based on Norwegian hospital administrative data*



| Code  | Title                                                         |
|-------|---------------------------------------------------------------|
| JLE40 | Total excision of transplanted pancreas                       |
| JLE50 | Occlusion of duct of transplanted pancreas                    |
| JLE56 | Conversion of pancreaticocystostomy to pancreaticoenterostomy |
| JLE96 | Other transplantation of pancreas or related operation        |
| JLW96 | Other operation on pancreas                                   |

Table 14. NCSP-N codes for procedures on the spleen

| Code  | Title                            |
|-------|----------------------------------|
| JMA00 | Partial splenectomy              |
| JMA10 | Transabdominal total splenectomy |
| JMA20 | Transthoracic total splenectomy  |
| JMB00 | Biopsy of spleen                 |
| JMB10 | Repair of spleen                 |
| JMW96 | Other operation on spleen        |

Table 15. NCSP-N codes for other digestive system procedures

| Code  | Title                                                                      |
|-------|----------------------------------------------------------------------------|
| JAA10 | Excision of lesion of abdominal wall                                       |
| JAA13 | Wide excision of extensive necrotising conditions of abdominal wall        |
| JAA96 | Other local operation on abdominal wall                                    |
| JAK00 | Laparotomy and drainage of peritoneal cavity                               |
| JAK03 | Laparotomy and peritoneal irrigation                                       |
| JAK10 | Laparotomy and insertion of peritoneal dialysis catheter                   |
| JAL00 | Biopsy of peritoneum                                                       |
| JAL10 | Laparotomy and removal of foreign body                                     |
| JAL20 | Excision or destruction of lesion of peritoneum                            |
| JAL23 | Excision of local lesion of pelvic wall                                    |
| JAL30 | Omentectomy                                                                |
| JAL50 | Intraabdominal revision of shunt of ventricle of brain                     |
| JAL96 | Other excision of lesion of peritoneum                                     |
| JAM00 | Transposition of omentum                                                   |
| JAM10 | Operation for malrotation of intestine                                     |
| JAN00 | Creation of peritoneovenous shunt                                          |
| JAN10 | Revision of peritoneovenous shunt                                          |
| JAN20 | Removal of peritoneovenous shunt                                           |
| JAP00 | Freeing of adhesions in the peritoneal cavity                              |
| JAQ00 | Extensive excision of peritoneum                                           |
| JAQ10 | Intraoperative hyperthermic chemotherapeutic perfusion of abdominal cavity |
| JAW96 | Other operation on abdominal wall, peritoneum, mesentery or omentum        |
| JBA00 | Transabdominal repair of diaphragm for rupture                             |

*Postoperative wound dehiscence after laparotomy: a useful health care quality indicator? A cohort study based on Norwegian hospital administrative data*

| Code  | Title                                                                                  |
|-------|----------------------------------------------------------------------------------------|
| JBA10 | Transabdominal biopsy or excision of lesion of diaphragm                               |
| JBA20 | Transabdominal partial excision of diaphragm                                           |
| JBW96 | Other transabdominal operation on diaphragm or operation for gastro-oesophageal reflux |

Table 16. NCSP-N codes for procedures on kidney and pelvis of kidney

| Code  | Title                                                                                   |
|-------|-----------------------------------------------------------------------------------------|
| KAA00 | Exploration of kidney                                                                   |
| KAA20 | Exploratory nephrotomy                                                                  |
| KAA30 | Exploratory pyelotomy                                                                   |
| KAA96 | Other exploration of kidney or pelvis of kidney                                         |
| KAB00 | Biopsy of kidney or pelvis of kidney                                                    |
| KAC00 | Nephrectomy                                                                             |
| KAC20 | Nephroureterectomy                                                                      |
| KAD00 | Partial nephrectomy                                                                     |
| KAD10 | Heminephrectomy                                                                         |
| KAD40 | Partial excision of pelvis of kidney                                                    |
| KAD50 | Destruction of tumour of pelvis of kidney                                               |
| KAD56 | Destruction of lesion of renal parenchyma                                               |
| KAD60 | Percutaneous destruction of lesion of renal parenchyma                                  |
| KAD96 | Other partial excision of kidney or pelvis of kidney                                    |
| KAE00 | Nephrolithotomy                                                                         |
| KAE10 | Pyelolithotomy                                                                          |
| KAE96 | Other removal of calculus from kidney or pelvis of kidney                               |
| KAF00 | Removal of foreign body from kidney                                                     |
| KAF10 | Removal of foreign body from pelvis of kidney                                           |
| KAH00 | Suture of kidney                                                                        |
| KAH10 | Suture of pelvis of kidney                                                              |
| KAH30 | Pyeloureteroplasty without division of ureteropelvic junction                           |
| KAH40 | Pyeloureteroplasty with division of ureteropelvic junction                              |
| KAH50 | Ureterocalyceal anastomosis                                                             |
| KAH70 | Freeing of adhesions of ureteropelvic junction                                          |
| KAH80 | Nephropexy                                                                              |
| KAH96 | Other reconstruction of kidney or pelvis of kidney                                      |
| KAS00 | Autotransplantation of kidney                                                           |
| KAS10 | Allogenic transplantation of kidney from cadaver donor                                  |
| KAS13 | Allogenic transplantation of kidney from cadaver donor                                  |
| KAS20 | Allogenic transplantation of kidney from living donor with minimally invasive technique |
| KAS23 | Allogenic transplantation of kidney from living donor with minimally invasive technique |
| KAS40 | Excision of transplanted kidney                                                         |
| KAS50 | Nephrocystostomy in transplanted kidney                                                 |
| KAS60 | Operation for lymphocele of transplanted kidney                                         |
| KAS96 | Other transplantation of kidney or related procedure                                    |
| KAW96 | Other operation on kidney or pelvis of kidney                                           |

Postoperative wound dehiscence after laparotomy: a useful health care quality indicator? A cohort study based on Norwegian hospital administrative data

Table 17. NCSP-N codes for procedures on other urinary and male genital organs: ureter, bladder, urethra, prostate and seminal vesicles

| Code  | Title                                                               |
|-------|---------------------------------------------------------------------|
| KBA00 | Exploration of ureter                                               |
| KBA10 | Exploratory ureterotomy                                             |
| KBA96 | Other exploration of ureter                                         |
| KBB00 | Biopsy of ureter                                                    |
| KBC00 | Ureterectomy                                                        |
| KBD00 | Partial excision of ureter                                          |
| KBD20 | Destruction of tumour of ureter                                     |
| KBD30 | Excision of stump of ureter                                         |
| KBD96 | Other partial excision of ureter or destruction of tumour of ureter |
| KBE00 | Ureterolithotomy                                                    |
| KBE96 | Other operation for calculus of ureter                              |
| KBF00 | Removal of foreign body from ureter                                 |
| KBH00 | Suture of ureter                                                    |
| KBH06 | Ureteroureterostomy                                                 |
| KBH10 | Connection of ureter to contralateral ureter                        |
| KBH20 | Replantation of ureter                                              |
| KBH30 | Ileal replacement of ureter                                         |
| KBH40 | Plastic repair of ureter                                            |
| KBH50 | Ureterolysis                                                        |
| KBH96 | Other repair or connection of ureter                                |
| KBJ00 | Cutaneous ureterostomy                                              |
| KBJ10 | Cutaneous ureteroenterostomy                                        |
| KBJ20 | Cutaneous ureteroenterostomy with reservoir                         |
| KBJ40 | Ureteroenterostomy                                                  |
| KBJ60 | Anastomosis of ureter to urethra with interposition of ileum        |
| KBJ70 | Removal of calculus from ileal conduit or reservoir                 |
| KBJ80 | Operation for malfunction of urinary diversion                      |
| KBJ96 | Other urinary diversion from ureter or related operation            |
| KBV00 | Insertion of stent into ureter                                      |
| KBV10 | Removal of stent from ureter                                        |
| KBV40 | Incision or excision of ureterocele                                 |
| KBW96 | Other operation on ureter                                           |
| KCA00 | Exploratory cystotomy                                               |
| KCB00 | Biopsy of bladder                                                   |
| KCC00 | Cystectomy                                                          |
| KCC10 | Cystoprostatectomy                                                  |
| KCC20 | Cystoprostatourethrectomy                                           |
| KCC30 | Cystectomy with excision of female internal genital organs          |
| KCC96 | Other cystectomy                                                    |
| KCD10 | Partial cystectomy                                                  |
| KCD20 | Excision of diverticulum of bladder                                 |
| KCD30 | Destruction of tumour of bladder                                    |

Postoperative wound dehiscence after laparotomy: a useful health care quality indicator? A cohort study based on Norwegian hospital administrative data

For peer review only - <http://bmjopen.bmj.com/site/about/guidelines.xhtml>

| Code  | Title                                                                  |
|-------|------------------------------------------------------------------------|
| KCD40 | Excision of urachus or other vesicocutaneous fistula                   |
| KCD96 | Other partial excision or destruction of tumour of bladder             |
| KCE00 | Cystolithotomy                                                         |
| KCF00 | Cystotomy and removal of foreign body from bladder                     |
| KCH00 | Suture of bladder                                                      |
| KCH10 | Enterocystoplasty                                                      |
| KCH20 | Reduction cystoplasty                                                  |
| KCH30 | Closure of vesicointestinal fistula                                    |
| KCH40 | Incision or resection of bladder neck                                  |
| KCH96 | Other reconstructive operation on bladder                              |
| KCJ00 | Cystostomy                                                             |
| KCJ10 | Cutaneous cystoenterostomy                                             |
| KCJ20 | Continent cutaneous cystoenterostomy                                   |
| KCJ96 | Other cystostomy                                                       |
| KCV10 | Denervation of bladder                                                 |
| KCV20 | Freeing of bladder                                                     |
| KCW96 | Other operations on bladder                                            |
| KDC00 | Urethrectomy                                                           |
| KDD00 | Partial excision of urethra                                            |
| KDD10 | Excision of diverticulum of urethra                                    |
| KDD30 | Destruction of tumour of urethra                                       |
| KDD40 | Resection of external sphincter of urethra                             |
| KDD50 | Excision of urethral valve                                             |
| KDD80 | Partial excision of urethra and repair using graft or flap             |
| KDD96 | Other partial excision of urethra                                      |
| KDG00 | Retropubic suspension of urethra                                       |
| KDG20 | Abdominal colposuspension                                              |
| KDG30 | Suprapubic sling urethrocystopexy                                      |
| KDG40 | Suprapubic urethrocystopexy                                            |
| KDG43 | Transobturatorial sling urethrocystopexy                               |
| KDG50 | Transabdominal plastic repair of pelvic floor for urinary incontinence |
| KDG60 | Implantation of adjustable expander around bladder neck                |
| KDG70 | Exploration of urethra                                                 |
| KDG96 | Other operation on urethra or bladder neck for incontinence            |
| KDH00 | Suture of urethra                                                      |
| KDH10 | Meatoplasty of urethra                                                 |
| KDH30 | Closure of urethrocutaneous fistula                                    |
| KDH50 | Closure of urethrointestinal fistula                                   |
| KDH70 | Plastic repair of stricture of urethra                                 |
| KDH96 | Other reconstructive operation on urethra                              |
| KDJ00 | Urethrostomy                                                           |
| KDK00 | Implantation of artificial urinary sphincter around bladder neck       |
| KDK10 | Implantation of artificial urinary sphincter around bulbar urethra     |
| KDK30 | Revision of artificial urethral sphincter                              |

*Postoperative wound dehiscence after laparotomy: a useful health care quality indicator? A cohort study based on Norwegian hospital administrative data*

For peer review only - <http://bmjopen.bmj.com/site/about/guidelines.xhtml>

| Code  | Title                                          |
|-------|------------------------------------------------|
| KDK40 | Removal of artificial urethral sphincter       |
| KDW96 | Other operation on urethra                     |
| KEA00 | Exploration of prostate                        |
| KEA10 | Prostatotomy                                   |
| KEA20 | Incision of seminal vesicle                    |
| KEB00 | Biopsy of prostate                             |
| KED96 | Other partial excision of prostate             |
| KEE00 | Prostatalithotomy                              |
| KEE10 | Removal of foreign body from prostate          |
| KEW96 | Other operation on prostate or seminal vesicle |

Table 18- NCSP-N codes for procedures on female genital organs: ovary, fallopian tube, uterus and uterine ligaments

| Code  | Title                                                 |
|-------|-------------------------------------------------------|
| LAA00 | Puncture of ovarian cyst                              |
| LAB00 | Ovariectomy                                           |
| LAB10 | Biopsy of ovary                                       |
| LAB96 | Other incision or biopsy of ovary                     |
| LAC00 | Excision of ovarian cyst                              |
| LAC10 | Fenestration of ovarian cyst                          |
| LAC20 | Destruction of lesion of ovary                        |
| LAC30 | Excision of paraovarian cyst                          |
| LAC96 | Other excision or destruction of lesion of ovary      |
| LAD00 | Partial excision of ovary                             |
| LAE10 | Unilateral oophorectomy                               |
| LAE20 | Bilateral oophorectomy                                |
| LAF00 | Unilateral salpingo-oophorectomy                      |
| LAF10 | Bilateral salpingo-oophorectomy                       |
| LAF20 | Unilateral transvaginal salpingo-oophorectomy         |
| LAF30 | Bilateral transvaginal salpingo-oophorectomy          |
| LAG00 | Freeing of adhesions of ovary                         |
| LAG10 | Oophoropexy                                           |
| LAG20 | Detorsion of ovary                                    |
| LAG96 | Other reconstructive operation on ovary               |
| LAW96 | Other operation on ovary                              |
| LBB00 | Biopsy of Fallopian tube                              |
| LBB96 | Other biopsy of Fallopian tube                        |
| LBC10 | Removal of products of conception from Fallopian tube |
| LBC20 | Salpingotomy and removal of products of conception    |
| LBC96 | Other tube conserving operation for tubal pregnancy   |
| LBD00 | Partial excision of Fallopian tube                    |
| LBE00 | Salpingectomy                                         |
| LBF00 | Perfusion of Fallopian tube                           |

*Postoperative wound dehiscence after laparotomy: a useful health care quality indicator? A cohort study based on Norwegian hospital administrative data*

| Code  | Title                                                 |
|-------|-------------------------------------------------------|
| LBF03 | Perfusion of Fallopian tube after reconstruction      |
| LBF20 | Transcervical catheter salpingoplasty                 |
| LBF30 | Salpingolysis                                         |
| LBF40 | Fimbrioplasty                                         |
| LBF50 | Salpingostomy                                         |
| LBF60 | Partial excision and anastomosis of Fallopian tube    |
| LBF70 | Partial excision and reimplantation of Fallopian tube |
| LBF96 | Other operation on Fallopian tube for infertility     |
| LBW96 | Other operation on Fallopian tube                     |
| LCA00 | Biopsy of uterus or uterine ligaments                 |
| LCB00 | Hysterotomy                                           |
| LCB10 | Myomectomy                                            |
| LCB96 | Other excision of lesion of uterus                    |
| LCC00 | Partial excision of uterus                            |
| LCC10 | Supravaginal hysterectomy                             |
| LCC20 | Vaginal supravaginal hysterectomy                     |
| LCC96 | Other partial excision of uterus                      |
| LCD00 | Hysterectomy                                          |
| LCD10 | Vaginal hysterectomy                                  |
| LCD30 | Radical hysterectomy                                  |
| LCD40 | Radical vaginal hysterectomy                          |
| LCD96 | Other hysterectomy                                    |
| LCE00 | Anterior exenteration of female pelvis                |
| LCE10 | Posterior exenteration of female pelvis               |
| LCE20 | Total exenteration of female pelvis                   |
| LCE96 | Other exenteration of female pelvis                   |
| LCF00 | Excision of lesion of parametrium                     |
| LCF10 | Excision of female varicocele                         |
| LCF96 | Other excision of lesion of parametrium               |
| LCG10 | Suture of uterus                                      |
| LCG20 | Hysteropexy                                           |
| LCG30 | Resection or transcision of sacrouterine ligaments    |
| LCG40 | Reconstruction of uterus                              |
| LCG96 | Other reconstructive operation on uterus              |
| LCW96 | Other operation on uterus and uterine ligaments       |

Table 19. NCSP-N codes for procedures on the peripheral vessels of the abdomen

| Code  | Title                                                                                                       |
|-------|-------------------------------------------------------------------------------------------------------------|
| PCB20 | Ligature of coeliac trunk and branches                                                                      |
| PCB30 | Ligature of superior mesenteric artery                                                                      |
| PCB40 | Ligature of renal artery                                                                                    |
| PCB99 | Ligature of other visceral artery                                                                           |
| PCC10 | Suture of suprarenal or juxtarenal abdominal aorta                                                          |
| PCC20 | Suture of coeliac trunk and branches                                                                        |
| PCC30 | Suture of superior mesenteric artery                                                                        |
| PCC40 | Suture of renal artery                                                                                      |
| PCC99 | Suture of other visceral artery                                                                             |
| PCE30 | Thrombectomy or embolectomy of superior mesenteric artery                                                   |
| PCE40 | Thrombectomy or embolectomy of renal artery                                                                 |
| PCE99 | Thrombectomy or embolectomy of other visceral artery                                                        |
| PCF20 | Thrombendarterectomy of coeliac trunk and branches                                                          |
| PCF30 | Thrombendarterectomy of superior mesenteric artery                                                          |
| PCF40 | Thrombendarterectomy of renal artery                                                                        |
| PCF99 | Thrombendarterectomy of other visceral artery                                                               |
| PCG10 | Operation for aneurysm of supraceliac or juxtarenal abdominal aorta                                         |
| PCG20 | Operation for aneurysm of coeliac trunk and branches                                                        |
| PCG30 | Operation for aneurysm of superior mesenteric artery                                                        |
| PCG40 | Operation for aneurysm of renal artery                                                                      |
| PCG99 | Operation for aneurysm of other visceral artery                                                             |
| PCH10 | Bypass from supraceliac or juxtarenal abdominal aorta                                                       |
| PCH20 | Bypass to/from coeliac trunk and branches                                                                   |
| PCH30 | Bypass from superior mesenteric artery                                                                      |
| PCH40 | Bypass from renal artery                                                                                    |
| PCH99 | Bypass from other visceral artery                                                                           |
| PCJ30 | Transposition of superior mesenteric artery                                                                 |
| PCJ40 | Transposition of renal artery                                                                               |
| PCJ99 | Transposition of other visceral artery                                                                      |
| PCK20 | Reimplantation of coeliac trunk and branches                                                                |
| PCK30 | Reimplantation of superior mesenteric artery                                                                |
| PCK40 | Reimplantation of renal artery                                                                              |
| PCK50 | Reimplantation of inferior mesenteric artery                                                                |
| PCK99 | Reimplantation of other visceral artery                                                                     |
| PCN20 | Plastic repair of coeliac trunk and branches                                                                |
| PCN30 | Plastic repair of superior mesenteric artery                                                                |
| PCN40 | Plastic repair of renal artery                                                                              |
| PCN99 | Plastic repair of other visceral artery                                                                     |
| PCU70 | Exploration of previous reconstruction of suprarenal abdominal aorta or visceral arteries                   |
| PCU74 | Thrombectomy or embolectomy in bypass from suprarenal abdominal aorta and visceral arteries                 |
| PCU81 | Closure of persisting arteriovenous fistula of bypass from suprarenal abdominal aorta and visceral arteries |
| PCU82 | Plastic repair in bypass from suprarenal abdominal aorta and visceral arteries                              |
| PCU99 | Other repair after previous reconstruction of suprarenal abdominal aorta and visceral arteries              |

*Postoperative wound dehiscence after laparotomy: a useful health care quality indicator? A cohort study based on Norwegian hospital administrative data*

| Code  | Title                                                                                                         |
|-------|---------------------------------------------------------------------------------------------------------------|
| PCW99 | Other operation on suprarenal abdominal aorta and visceral arteries                                           |
| PDA10 | Exploration of infrarenal abdominal aorta                                                                     |
| PDA30 | Exploration of iliac artery                                                                                   |
| PDC10 | Suture of infrarenal abdominal aorta                                                                          |
| PDC30 | Suture of iliac artery                                                                                        |
| PDE10 | Thrombectomy or embolectomy of infrarenal abdominal aorta                                                     |
| PDE30 | Thrombectomy or embolectomy of iliac artery                                                                   |
| PDF10 | Thrombendarterectomy of infrarenal abdominal aorta                                                            |
| PDF30 | Thrombendarterectomy of iliac artery                                                                          |
| PDG10 | Operation on infrarenal abdominal aorta for aneurysm                                                          |
| PDG20 | Bypass from aorta to iliac artery for aneurysm                                                                |
| PDG21 | Bypass from aorta to bilateral iliac arteries for aneurysm                                                    |
| PDG22 | Bypass from aorta to iliac and contralateral femoral artery for aneurysm                                      |
| PDG23 | Bypass from aorta to femoral artery for aneurysm                                                              |
| PDG24 | Bypass from aorta to bilateral femoral arteries for aneurysm                                                  |
| PDG30 | Operation on iliac artery for aneurysm                                                                        |
| PDG35 | Bypass from iliac to femoral artery for aneurysm                                                              |
| PDG99 | Other operation for aneurysm of infrarenal abdominal aorta and iliac arteries                                 |
| PDH10 | Bypass from infrarenal abdominal aorta                                                                        |
| PDH20 | Bypass from aorta to iliac artery                                                                             |
| PDH21 | Bypass from aorta to bilateral iliac arteries                                                                 |
| PDH22 | Bypass from aorta to iliac and contralateral femoral artery                                                   |
| PDH23 | Bypass from aorta to femoral artery                                                                           |
| PDH24 | Bypass from aorta to bilateral femoral arteries                                                               |
| PDH30 | Bypass from iliac artery                                                                                      |
| PDH35 | Bypass from iliac to femoral artery                                                                           |
| PDH99 | Other bypass from abdominal aorta or iliac artery                                                             |
| PDN10 | Plastic repair of infrarenal abdominal aorta                                                                  |
| PDN30 | Plastic repair of iliac artery                                                                                |
| PDU70 | Exploration of previous reconstruction of infrarenal abdominal aorta or iliac arteries and distal connections |
| PDU74 | Thrombectomy or embolectomy in bypass from infrarenal abdominal aorta or iliac artery                         |
| PDU81 | Closure of persisting arteriovenous fistula of bypass from infrarenal abdominal aorta or iliac artery         |
| PDU82 | Plastic repair of bypass from infrarenal abdominal aorta or iliac artery                                      |
| PDU99 | Other repair after previous reconstruction of infrarenal abdominal aorta and iliac arteries and distal        |
| PDW99 | Other operation on infrarenal abdominal aorta and iliac arteries and distal connections                       |
| PHB23 | Ligature of iliac vein                                                                                        |
| PHB30 | Ligature of inferior vena cava                                                                                |
| PHB31 | Ligature of renal vein                                                                                        |
| PHB32 | Ligature of portal vein                                                                                       |
| PHB33 | Ligature of v. mesenterica superior                                                                           |
| PHB34 | Ligature of v. mesenterica inferior                                                                           |
| PHB36 | Ligature of v. spermatica                                                                                     |
| PHC23 | Suture of iliac vein                                                                                          |
| PHC30 | Suture of inferior vena cava                                                                                  |

*Postoperative wound dehiscence after laparotomy: a useful health care quality indicator? A cohort study based on Norwegian hospital administrative data*

For peer review only - <http://bmjopen.bmj.com/site/about/guidelines.xhtml>



| Code  | Title                                     |
|-------|-------------------------------------------|
| PHC31 | Suture of renal vein                      |
| PHC32 | Suture of portal vein                     |
| PHC33 | Suture of v. mesenterica superior         |
| PHC34 | Suture of v. mesenterica inferior         |
| PHD30 | Resection of inferior vena cava           |
| PHD32 | Resection of portal vein                  |
| PHD33 | Resection of v. mesenterica superior      |
| PHD34 | Resection of v. mesenterica inferior      |
| PHD36 | Resection of v. spermatica                |
| PHE23 | Thrombectomy of iliac vein                |
| PHE30 | Thrombectomy of inferior vena cava        |
| PHE31 | Thrombectomy of renal vein                |
| PHH25 | Bypass from iliac vein                    |
| PHH30 | Bypass from inferior vena cava            |
| PHN30 | Plastic repair of inferior vena cava      |
| PHN32 | Plastic repair of portal vein             |
| PHN33 | Plastic repair of v. mesenterica superior |
| PHN34 | Plastic repair of v. mesenterica inferior |
| PHW35 | Portosystemic shunt or bypass             |

**The RECORD statement – checklist of items, extended from the STROBE statement, that should be reported in observational studies using routinely collected health data.**

|                           | Item No. | STROBE items                                                                                                                                                                               | Location in manuscript where items are reported | RECORD items                                                                                                                                                                                                                                                                                                                                                                                                                                | Location in manuscript where items are reported                                                                |
|---------------------------|----------|--------------------------------------------------------------------------------------------------------------------------------------------------------------------------------------------|-------------------------------------------------|---------------------------------------------------------------------------------------------------------------------------------------------------------------------------------------------------------------------------------------------------------------------------------------------------------------------------------------------------------------------------------------------------------------------------------------------|----------------------------------------------------------------------------------------------------------------|
| <b>Title and abstract</b> |          |                                                                                                                                                                                            |                                                 |                                                                                                                                                                                                                                                                                                                                                                                                                                             |                                                                                                                |
|                           | 1        | (a) Indicate the study's design with a commonly used term in the title or the abstract (b) Provide in the abstract an informative and balanced summary of what was done and what was found | Title                                           | RECORD 1.1: The type of data used should be specified in the title or abstract. When possible, the name of the databases used should be included.<br><br>RECORD 1.2: If applicable, the geographic region and timeframe within which the study took place should be reported in the title or abstract.<br><br>RECORD 1.3: If linkage between databases was conducted for the study, this should be clearly stated in the title or abstract. | Title and abstract<br><br>Abstract 1 21<br><br>Title and abstract 1 20-21<br><br>No linkages between databases |
| <b>Introduction</b>       |          |                                                                                                                                                                                            |                                                 |                                                                                                                                                                                                                                                                                                                                                                                                                                             |                                                                                                                |
| Background rationale      | 2        | Explain the scientific background and rationale for the investigation being reported                                                                                                       | Introduction, 1 49-73                           |                                                                                                                                                                                                                                                                                                                                                                                                                                             |                                                                                                                |
| Objectives                | 3        | State specific objectives, including any prespecified hypotheses                                                                                                                           | Introduction, 1 74-79                           |                                                                                                                                                                                                                                                                                                                                                                                                                                             |                                                                                                                |
| <b>Methods</b>            |          |                                                                                                                                                                                            |                                                 |                                                                                                                                                                                                                                                                                                                                                                                                                                             |                                                                                                                |
| Study Design              | 4        | Present key elements of study design early in the paper                                                                                                                                    | Abstract, 1 20-30.                              |                                                                                                                                                                                                                                                                                                                                                                                                                                             |                                                                                                                |
| Setting                   | 5        | Describe the setting, locations, and relevant dates, including periods of recruitment, exposure, follow-up, and data collection                                                            | Materials and methods                           |                                                                                                                                                                                                                                                                                                                                                                                                                                             |                                                                                                                |
| Participants              | 6        | (a) <i>Cohort study</i> - Give the eligibility criteria, and the                                                                                                                           | Materials and methods, 1. 81-82                 | RECORD 6.1: The methods of study population selection (such as codes or                                                                                                                                                                                                                                                                                                                                                                     | Materials and methods, 1 96-109.                                                                               |

|                           |   |                                                                                                                                                                                                                                                                                                                                                                                                                                                                                                                                                                                                                                                             |                                                                                                                       |                                                                                                                                                                                                                                                                                                                                                                                                                                                                                                                                                                                                                              |                                                                                                                                                                                        |
|---------------------------|---|-------------------------------------------------------------------------------------------------------------------------------------------------------------------------------------------------------------------------------------------------------------------------------------------------------------------------------------------------------------------------------------------------------------------------------------------------------------------------------------------------------------------------------------------------------------------------------------------------------------------------------------------------------------|-----------------------------------------------------------------------------------------------------------------------|------------------------------------------------------------------------------------------------------------------------------------------------------------------------------------------------------------------------------------------------------------------------------------------------------------------------------------------------------------------------------------------------------------------------------------------------------------------------------------------------------------------------------------------------------------------------------------------------------------------------------|----------------------------------------------------------------------------------------------------------------------------------------------------------------------------------------|
|                           |   | <p>sources and methods of selection of participants. Describe methods of follow-up</p> <p><i>Case-control study</i> - Give the eligibility criteria, and the sources and methods of case ascertainment and control selection. Give the rationale for the choice of cases and controls</p> <p><i>Cross-sectional study</i> - Give the eligibility criteria, and the sources and methods of selection of participants</p> <p><i>(b) Cohort study</i> - For matched studies, give matching criteria and number of exposed and unexposed</p> <p><i>Case-control study</i> - For matched studies, give matching criteria and the number of controls per case</p> | <p>and 196-109</p>                                                                                                    | <p>algorithms used to identify subjects) should be listed in detail. If this is not possible, an explanation should be provided.</p> <p>RECORD 6.2: Any validation studies of the codes or algorithms used to select the population should be referenced. If validation was conducted for this study and not published elsewhere, detailed methods and results should be provided.</p> <p>RECORD 6.3: If the study involved linkage of databases, consider use of a flow diagram or other graphical display to demonstrate the data linkage process, including the number of individuals with linked data at each stage.</p> | <p>All codes are listed in the Supplementary File</p> <p>References to validation studies are given in Introduction, 166-69, and in Discussion, 196</p> <p>Not considered relevant</p> |
| Variables                 | 7 | Clearly define all outcomes, exposures, predictors, potential confounders, and effect modifiers. Give diagnostic criteria, if applicable.                                                                                                                                                                                                                                                                                                                                                                                                                                                                                                                   | Materials and methods, 196-109, and Supplementary File. Model variables are specified in Statistical methods, 115-120 | RECORD 7.1: A complete list of codes and algorithms used to classify exposures, outcomes, confounders, and effect modifiers should be provided. If these cannot be reported, an explanation should be provided.                                                                                                                                                                                                                                                                                                                                                                                                              | Codes are listed in the Supplementary File                                                                                                                                             |
| Data sources/ measurement | 8 | For each variable of interest, give sources of data and details of methods of assessment (measurement). Describe comparability of assessment methods if there is more than one group                                                                                                                                                                                                                                                                                                                                                                                                                                                                        | Covered by the above                                                                                                  |                                                                                                                                                                                                                                                                                                                                                                                                                                                                                                                                                                                                                              |                                                                                                                                                                                        |
| Bias                      | 9 | Describe any efforts to address potential sources of bias                                                                                                                                                                                                                                                                                                                                                                                                                                                                                                                                                                                                   | Hospital PWD rates are risk adjusted, see                                                                             |                                                                                                                                                                                                                                                                                                                                                                                                                                                                                                                                                                                                                              |                                                                                                                                                                                        |

|   |                                     |    |                                                                                                                                                                                                                                                                                                                                                                                                                                                                                                                                                                                                                |                                                                                                                                                                                                                                              |                                                                                                                                                                                                                                                  |
|---|-------------------------------------|----|----------------------------------------------------------------------------------------------------------------------------------------------------------------------------------------------------------------------------------------------------------------------------------------------------------------------------------------------------------------------------------------------------------------------------------------------------------------------------------------------------------------------------------------------------------------------------------------------------------------|----------------------------------------------------------------------------------------------------------------------------------------------------------------------------------------------------------------------------------------------|--------------------------------------------------------------------------------------------------------------------------------------------------------------------------------------------------------------------------------------------------|
| 1 |                                     |    | statistical methods 1<br>115-120                                                                                                                                                                                                                                                                                                                                                                                                                                                                                                                                                                               |                                                                                                                                                                                                                                              |                                                                                                                                                                                                                                                  |
| 2 | Study size                          | 10 | Explain how the study size was<br>arrived at                                                                                                                                                                                                                                                                                                                                                                                                                                                                                                                                                                   | Determined by study<br>period                                                                                                                                                                                                                |                                                                                                                                                                                                                                                  |
| 3 | Quantitative<br>variables           | 11 | Explain how quantitative<br>variables were handled in the<br>analyses. If applicable, describe<br>which groupings were chosen,<br>and why                                                                                                                                                                                                                                                                                                                                                                                                                                                                      | Model variables are<br>specified in<br>Statistical methods, 1.<br>115-120                                                                                                                                                                    |                                                                                                                                                                                                                                                  |
| 4 | Statistical<br>methods              | 12 | (a) Describe all statistical<br>methods, including those used to<br>control for confounding<br>(b) Describe any methods used to<br>examine subgroups and<br>interactions<br>(c) Explain how missing data<br>were addressed<br>(d) <i>Cohort study</i> - If applicable,<br>explain how loss to follow-up<br>was addressed<br><i>Case-control study</i> - If<br>applicable, explain how matching<br>of cases and controls was<br>addressed<br><i>Cross-sectional study</i> - If<br>applicable, describe analytical<br>methods taking account of<br>sampling strategy<br>(e) Describe any sensitivity<br>analyses | a) See Statistical<br>methods<br>c) No missing data<br>were found in final<br>data set<br>d) Loss to follow up<br>assumed to be very<br>low and uniform<br>across hospitals<br>e) Materials and<br>methods, 1 131-134,<br>Results, 1 173-174 |                                                                                                                                                                                                                                                  |
| 5 | Data access and<br>cleaning methods |    | ..                                                                                                                                                                                                                                                                                                                                                                                                                                                                                                                                                                                                             |                                                                                                                                                                                                                                              | RECORD 12.1: Authors should<br>describe the extent to which the<br>investigators had access to the database<br>population used to create the study<br>population.<br><br>RECORD 12.2: Authors should provide<br>information on the data cleaning |
| 6 |                                     |    |                                                                                                                                                                                                                                                                                                                                                                                                                                                                                                                                                                                                                |                                                                                                                                                                                                                                              | The authors had<br>no access to the<br>NPR's databases<br><br>Materials and<br>methods, 1 89-91                                                                                                                                                  |

|                                                                            |                  |    |                                                                                                                                                                                                                                                                                                                                                 |                                                                                                                                                                                                                           |                                                                                                                                                                                                                                                                                                                    |
|----------------------------------------------------------------------------|------------------|----|-------------------------------------------------------------------------------------------------------------------------------------------------------------------------------------------------------------------------------------------------------------------------------------------------------------------------------------------------|---------------------------------------------------------------------------------------------------------------------------------------------------------------------------------------------------------------------------|--------------------------------------------------------------------------------------------------------------------------------------------------------------------------------------------------------------------------------------------------------------------------------------------------------------------|
|                                                                            |                  |    |                                                                                                                                                                                                                                                                                                                                                 | methods used in the study.                                                                                                                                                                                                |                                                                                                                                                                                                                                                                                                                    |
| 1<br>2<br>3<br>4<br>5<br>6<br>7                                            | Linkage          | .. |                                                                                                                                                                                                                                                                                                                                                 | RECORD 12.3: State whether the study included person-level, institutional-level, or other data linkage across two or more databases. The methods of linkage and methods of linkage quality evaluation should be provided. | NPR provided linkage to National Registry using the unique PIN                                                                                                                                                                                                                                                     |
| 8                                                                          | <b>Results</b>   |    |                                                                                                                                                                                                                                                                                                                                                 |                                                                                                                                                                                                                           |                                                                                                                                                                                                                                                                                                                    |
| 9                                                                          | Participants     | 13 | (a) Report the numbers of individuals at each stage of the study ( <i>e.g.</i> , numbers potentially eligible, examined for eligibility, confirmed eligible, included in the study, completing follow-up, and analysed)<br>(b) Give reasons for non-participation at each stage.<br>(c) Consider use of a flow diagram                          | Results, 1 146-151                                                                                                                                                                                                        | RECORD 13.1: Describe in detail the selection of the persons included in the study ( <i>i.e.</i> , study population selection) including filtering based on data quality, data availability and linkage. The selection of included persons can be described in the text and/or by means of the study flow diagram. |
| 10<br>11<br>12<br>13<br>14<br>15<br>16<br>17<br>18<br>19<br>20<br>21       | Descriptive data | 14 | (a) Give characteristics of study participants ( <i>e.g.</i> , demographic, clinical, social) and information on exposures and potential confounders<br>(b) Indicate the number of participants with missing data for each variable of interest<br>(c) <i>Cohort study</i> - summarise follow-up time ( <i>e.g.</i> , average and total amount) | a) Results, Table 1<br>b) See above<br>c) Not relevant                                                                                                                                                                    |                                                                                                                                                                                                                                                                                                                    |
| 22<br>23<br>24<br>25<br>26<br>27<br>28<br>29<br>30<br>31<br>32<br>33<br>34 | Outcome data     | 15 | <i>Cohort study</i> - Report numbers of outcome events or summary measures over time<br><i>Case-control study</i> - Report numbers in each exposure category, or summary measures of exposure<br><i>Cross-sectional study</i> - Report                                                                                                          | Results, Table 1                                                                                                                                                                                                          |                                                                                                                                                                                                                                                                                                                    |

|                                                                                                 |                |                                               |                                                                                                                                                                                                                                                                                                                                                                                                                 |                                          |                                                                                                                                                                                                                                                                                                          |
|-------------------------------------------------------------------------------------------------|----------------|-----------------------------------------------|-----------------------------------------------------------------------------------------------------------------------------------------------------------------------------------------------------------------------------------------------------------------------------------------------------------------------------------------------------------------------------------------------------------------|------------------------------------------|----------------------------------------------------------------------------------------------------------------------------------------------------------------------------------------------------------------------------------------------------------------------------------------------------------|
|                                                                                                 |                | numbers of outcome events or summary measures |                                                                                                                                                                                                                                                                                                                                                                                                                 |                                          |                                                                                                                                                                                                                                                                                                          |
| 1<br>2<br>3<br>4<br>5<br>6<br>7<br>8<br>9<br>10<br>11<br>12<br>13<br>14<br>15<br>16<br>17<br>18 | Main results   | 16                                            | (a) Give unadjusted estimates and, if applicable, confounder-adjusted estimates and their precision (e.g., 95% confidence interval). Make clear which confounders were adjusted for and why they were included<br>(b) Report category boundaries when continuous variables were categorized<br>(c) If relevant, consider translating estimates of relative risk into absolute risk for a meaningful time period | Results, l 156-157 and Figure 1, Table 2 |                                                                                                                                                                                                                                                                                                          |
| 19<br>20<br>21<br>22                                                                            | Other analyses | 17                                            | Report other analyses done—e.g., analyses of subgroups and interactions, and sensitivity analyses                                                                                                                                                                                                                                                                                                               | Results, l 168-174, Figure 1             |                                                                                                                                                                                                                                                                                                          |
| <b>Discussion</b>                                                                               |                |                                               |                                                                                                                                                                                                                                                                                                                                                                                                                 |                                          |                                                                                                                                                                                                                                                                                                          |
| 24<br>25<br>26                                                                                  | Key results    | 18                                            | Summarise key results with reference to study objectives                                                                                                                                                                                                                                                                                                                                                        | Discussion, l 176-184                    |                                                                                                                                                                                                                                                                                                          |
| 27<br>28<br>29<br>30<br>31<br>32<br>33<br>34<br>35                                              | Limitations    | 19                                            | Discuss limitations of the study, taking into account sources of potential bias or imprecision. Discuss both direction and magnitude of any potential bias                                                                                                                                                                                                                                                      |                                          | RECORD 19.1: Discuss the implications of using data that were not created or collected to answer the specific research question(s). Include discussion of misclassification bias, unmeasured confounding, missing data, and changing eligibility over time, as they pertain to the study being reported. |
| 36<br>37<br>38<br>39<br>40<br>41<br>42<br>43<br>44                                              | Interpretation | 20                                            | Give a cautious overall interpretation of results considering objectives, limitations, multiplicity of analyses, results from similar studies, and other relevant evidence                                                                                                                                                                                                                                      | Conclusions, l 220-231                   | Discussion, l 198-218                                                                                                                                                                                                                                                                                    |

|                                        |                                                           |    |                                                                                                                                                               |                                  |                                                                                                                                                          |                                  |
|----------------------------------------|-----------------------------------------------------------|----|---------------------------------------------------------------------------------------------------------------------------------------------------------------|----------------------------------|----------------------------------------------------------------------------------------------------------------------------------------------------------|----------------------------------|
| 1<br>2<br>3                            | Generalisability                                          | 21 | Discuss the generalisability (external validity) of the study results                                                                                         | Discussion, 1 214-218            |                                                                                                                                                          |                                  |
| 4                                      | <b>Other Information</b>                                  |    |                                                                                                                                                               |                                  |                                                                                                                                                          |                                  |
| 5<br>6<br>7<br>8<br>9                  | Funding                                                   | 22 | Give the source of funding and the role of the funders for the present study and, if applicable, for the original study on which the present article is based | No specific funding was received |                                                                                                                                                          |                                  |
| 10<br>11<br>12<br>13<br>14<br>15<br>16 | Accessibility of protocol, raw data, and programming code |    | ..                                                                                                                                                            |                                  | RECORD 22.1: Authors should provide information on how to access any supplemental information such as the study protocol, raw data, or programming code. | Contact the corresponding author |

\*Reference: Benchimol EI, Smeeth L, Guttman A, Harron K, Moher D, Petersen I, Sørensen HT, von Elm E, Langan SM, the RECORD Working Committee. The REporting of studies Conducted using Observational Routinely-collected health Data (RECORD) Statement. *PLoS Medicine* 2015; in press.

\*Checklist is protected under Creative Commons Attribution ([CC BY](https://creativecommons.org/licenses/by/4.0/)) license.
