# Supplementary material for: Postoperative wound dehiscence after laparotomy: a useful healthcare quality indicator? A cohort study based on Norwegian hospital administrative data
Source: PubMed Central journal article supplement — BMJ Open. 2019 Apr 3;9(4):e026422. doi: 10.1136/bmjopen-2018-026422 (PMC6500227; doi:10.1136/bmjopen-2018-026422), 2019-04-03
Supplement: bmjopen-2018-026422supp001.pdf [file bmjopen-2018-026422supp001.pdf]

## Online supplement

*Table 1. Hospital types*

| Hospital type                       | Number |
|-------------------------------------|--------|
| Small hospitals with acute function | 21     |
| Large hospitals with acute function | 22     |
| Regional hospitals                  | 4      |

*Table 2. Laparotomy cases after operation type (primary episode)*

| Operation type                             | Frequency, n (%) |
|--------------------------------------------|------------------|
| Gastrointestinal tract                     | 30 404 (38.9)    |
| More than one type of surgery <sup>a</sup> | 14 051 (18.0)    |
| Female genital organs                      | 10 720 (13.7)    |
| Other urinary and male genital organs      | 6 536 (8.4)      |
| Peripheral vascular surgery                | 4 628 (5.9)      |
| Biliary tract                              | 2 739 (3.5)      |
| Other digestive system                     | 2 226 (2.9)      |
| Kidney                                     | 2 152 (2.8)      |
| Exploratory laparotomy                     | 2 061 (2.6)      |
| Liver                                      | 1 122 (1.4)      |
| Pancreas                                   | 775 (1.0)        |
| Hernia (diaphragmal)                       | 274 (0.4)        |
| Spleen                                     | 248 (0.3)        |
| Thoracoabdominal aorta                     | 150 (0.2)        |

<sup>a</sup>Not counting exploratory laparotomy

*Table 3. Effect of hospital region, after risk adjustment. Odds ratio standardized to have geometric mean one.*

| Hospital region             | Adjusted odds ratio (95% confidence interval) |
|-----------------------------|-----------------------------------------------|
| South-Eastern Norway Region | 0.85 (0.78 - 0.92)                            |
| Central Norway Region       | 0.99 (0.89 - 1.10)                            |
| Western Norway Region       | 1.06 (0.96 - 1.17)                            |
| Northern Norway Region      | 1.13 (1.001 - 1.27)                           |

## Diagnoses

Table 4. ICD-10 diagnosis codes contained in MDC 14 (Pregnancy, childbirth, and puerperium)

| Code  | Title                                                                                            |
|-------|--------------------------------------------------------------------------------------------------|
| A34   | Obstetrical tetanus                                                                              |
| F53.0 | Mild mental and behavioural disorders associated with the puerperium, not elsewhere classified   |
| F53.1 | Severe mental and behavioural disorders associated with the puerperium, not elsewhere classified |
| F53.8 | Other mental and behavioural disorders associated with the puerperium, not elsewhere classified  |
| F53.9 | Puerperal mental disorder, unspecified                                                           |
| Oxx.x | Pregnancy, childbirth and puerperium                                                             |
| Z32.0 | Pregnancy, not (yet) confirmed                                                                   |
| Z32.1 | Pregnancy confirmed                                                                              |
| Z33   | Pregnant state, incidental                                                                       |
| Z34.0 | Supervision of normal first pregnancy                                                            |
| Z34.8 | Supervision of other normal pregnancy                                                            |
| Z34.9 | Supervision of normal pregnancy, unspecified                                                     |
| Z35.0 | Supervision of pregnancy with history of infertility                                             |
| Z35.1 | Supervision of pregnancy with history of abortive outcome                                        |
| Z35.2 | Supervision of pregnancy with other poor reproductive or obstetric history                       |
| Z35.3 | Supervision of pregnancy with history of insufficient antenatal care                             |
| Z35.4 | Supervision of pregnancy with grand multiparity                                                  |
| Z35.5 | Supervision of elderly primigravida                                                              |
| Z35.6 | Supervision of very young primigravida                                                           |
| Z35.8 | Supervision of other high-risk pregnancies                                                       |
| Z35.9 | Supervision of high-risk pregnancy, unspecified                                                  |
| Z36.0 | Antenatal screening for chromosomal anomalies                                                    |
| Z36.1 | Antenatal screening for raised alphafetoprotein level                                            |
| Z36.2 | Other antenatal screening based on amniocentesis                                                 |
| Z36.3 | Antenatal screening for malformations using ultrasound and other physical methods                |
| Z36.4 | Antenatal screening for fetal growth retardation using ultrasound and other physical methods     |
| Z36.5 | Antenatal screening for isoimmunization                                                          |
| Z36.8 | Other antenatal screening                                                                        |
| Z36.9 | Antenatal screening, unspecified                                                                 |
| Z37.0 | Single live birth                                                                                |
| Z37.1 | Single stillbirth                                                                                |
| Z37.2 | Twins, both liveborn                                                                             |
| Z37.3 | Twins, one liveborn and one stillborn                                                            |
| Z37.4 | Twins, both stillborn                                                                            |
| Z37.5 | Other multiple births, all liveborn                                                              |
| Z37.6 | Other multiple births, some liveborn                                                             |
| Z37.7 | Other multiple births, all stillborn                                                             |
| Z37.9 | Outcome of delivery, unspecified                                                                 |
| Z39.0 | Care and examination immediately after delivery                                                  |
| Z39.1 | Care and examination of lactating mother                                                         |
| Z39.2 | Routine postpartum follow-up                                                                     |
| Z64.0 | Problems related to unwanted pregnancy                                                           |

*Table 5. ICD-10 diagnosis codes for immunocompromised state*

| <b>Code</b> | <b>Title</b>                                                                                      |
|-------------|---------------------------------------------------------------------------------------------------|
| B20.0       | HIV disease resulting in mycobacterial infection                                                  |
| B20.1       | HIV disease resulting in other bacterial infections                                               |
| B20.2       | HIV disease resulting in cytomegaloviral disease                                                  |
| B20.3       | HIV disease resulting in other viral infections                                                   |
| B20.4       | HIV disease resulting in candidiasis                                                              |
| B20.5       | HIV disease resulting in other mycoses                                                            |
| B20.6       | HIV disease resulting in <i>Pneumocystis carinii</i> pneumonia                                    |
| B20.7       | HIV disease resulting in multiple infections                                                      |
| B20.8       | HIV disease resulting in other infectious and parasitic diseases                                  |
| B20.9       | HIV disease resulting in unspecified infectious or parasitic disease                              |
| B21.0       | HIV disease resulting in Kaposi's sarcoma                                                         |
| B21.1       | HIV disease resulting in Burkitt's lymphoma                                                       |
| B21.2       | HIV disease resulting in other types of non-Hodgkin's lymphoma                                    |
| B21.3       | HIV disease resulting in other malignant neoplasms of lymphoid, haematopoietic and related tissue |
| B21.7       | HIV disease resulting in multiple malignant neoplasms                                             |
| B21.8       | HIV disease resulting in other malignant neoplasms                                                |
| B21.9       | HIV disease resulting in unspecified malignant neoplasm                                           |
| B22.0       | HIV disease resulting in encephalopathy                                                           |
| B22.1       | HIV disease resulting in lymphoid interstitial pneumonitis                                        |
| B22.2       | HIV disease resulting in wasting syndrome                                                         |
| B22.7       | HIV disease resulting in multiple diseases classified elsewhere                                   |
| B23.1       | HIV disease resulting in (persistent) generalized lymphadenopathy                                 |
| B23.2       | HIV disease resulting in haematological and immunological abnormalities, not elsewhere classified |
| B23.8       | HIV disease resulting in other specified conditions                                               |
| B24         | Unspecified human immunodeficiency virus [HIV] disease                                            |
| B59         | Pneumocystosis                                                                                    |
| D47.1       | Chronic myeloproliferative disease                                                                |
| D70         | Agranulocytosis                                                                                   |
| D71         | Functional disorders of polymorphonuclear neutrophils                                             |
| D72.0       | Genetic anomalies of leukocytes                                                                   |
| D80.0       | Hereditary hypogammaglobulinaemia                                                                 |
| D80.1       | Nonfamilial hypogammaglobulinaemia                                                                |
| D80.2       | Selective deficiency of immunoglobulin A [IgA]                                                    |
| D80.3       | Selective deficiency of immunoglobulin G [IgG] subclasses                                         |
| D80.4       | Selective deficiency of immunoglobulin M [IgM]                                                    |
| D80.5       | Immunodeficiency with increased immunoglobulin M [IgM]                                            |
| D80.6       | Antibody deficiency with near-normal immunoglobulins or with hyperimmunoglobulinaemia             |
| D80.7       | Transient hypogammaglobulinaemia of infancy                                                       |
| D80.8       | Other immunodeficiencies with predominantly antibody defects                                      |
| D80.9       | Immunodeficiency with predominantly antibody defects, unspecified                                 |
| D81.0       | Severe combined immunodeficiency [SCID] with reticular dysgenesis                                 |
| D81.1       | Severe combined immunodeficiency [SCID] with low T- and B-cell numbers                            |
| D81.2       | Severe combined immunodeficiency [SCID] with low or normal B-cell numbers                         |
| D81.3       | Adenosine deaminase [ADA] deficiency                                                              |
| D81.4       | Nezelof's syndrome                                                                                |
| D81.5       | Purine nucleoside phosphorylase [PNP] deficiency                                                  |
| D81.6       | Major histocompatibility complex class I deficiency                                               |
| D81.7       | Major histocompatibility complex class II deficiency                                              |
| D81.8       | Other combined immunodeficiencies                                                                 |
| D81.9       | Combined immunodeficiency, unspecified                                                            |
| D82.0       | Wiskott-Aldrich syndrome                                                                          |
| D82.1       | Di George's syndrome                                                                              |

*Postoperative wound dehiscence after laparotomy: a useful health care quality indicator? A cohort study based on Norwegian hospital administrative data*

| Code  | Title                                                                                          |
|-------|------------------------------------------------------------------------------------------------|
| D82.2 | Immunodeficiency with short-limbed stature                                                     |
| D82.3 | Immunodeficiency following hereditary defective response to Epstein-Barr virus                 |
| D82.4 | Hyperimmunoglobulin E [IgE] syndrome                                                           |
| D82.8 | Immunodeficiency associated with other specified major defects                                 |
| D82.9 | Immunodeficiency associated with major defect, unspecified                                     |
| D83.0 | Common variable immunodeficiency with predominant abnormalities of B-cell numbers and function |
| D83.1 | Common variable immunodeficiency with predominant immunoregulatory T-cell disorders            |
| D83.2 | Common variable immunodeficiency with autoantibodies to B- or T-cells                          |
| D83.8 | Other common variable immunodeficiencies                                                       |
| D83.9 | Common variable immunodeficiency, unspecified                                                  |
| D84.0 | Lymphocyte function antigen-1 [LFA-1] defect                                                   |
| D84.1 | Defects in the complement system                                                               |
| D84.8 | Other specified immunodeficiencies                                                             |
| D84.9 | Immunodeficiency, unspecified                                                                  |
| D89.8 | Other specified disorders involving the immune mechanism, not elsewhere classified             |
| D89.9 | Disorder involving the immune mechanism, unspecified                                           |
| E40   | Kwashiorkor                                                                                    |
| E41   | Nutritional marasmus                                                                           |
| E42   | Marasmic kwashiorkor                                                                           |
| E43   | Unspecified severe protein-energy malnutrition                                                 |
| I12.0 | Hypertensive renal disease with renal failure                                                  |
| I13.1 | Hypertensive heart and renal disease with renal failure                                        |
| I13.2 | Hypertensive heart and renal disease with both (congestive) heart failure and renal failure    |
| K91.2 | Postsurgical malabsorption, not elsewhere classified                                           |
| N18.0 | End-stage renal disease                                                                        |
| N18.5 | Chronic kidney disease, stage 5                                                                |
| N18.8 | Other chronic renal failure                                                                    |
| T86.0 | Bone-marrow transplant rejection                                                               |
| T86.1 | Kidney transplant failure and rejection                                                        |
| T86.2 | Heart transplant failure and rejection                                                         |
| T86.3 | Heart-lung transplant failure and rejection                                                    |
| T86.4 | Liver transplant failure and rejection                                                         |
| T86.8 | Failure and rejection of other transplanted organs and tissues                                 |
| T86.9 | Failure and rejection of unspecified transplanted organ and tissue                             |
| Y83.0 | Surgical Operation with transplant of whole organ or tissue                                    |
| Z49.0 | Preparatory care for dialysis                                                                  |
| Z49.1 | Extracorporeal dialysis                                                                        |
| Z49.2 | Other dialysis                                                                                 |
| Z94.0 | Kidney transplant status                                                                       |
| Z94.1 | Heart transplant status                                                                        |
| Z94.2 | Lung transplant status                                                                         |
| Z94.3 | Heart and lungs transplant status                                                              |
| Z94.4 | Liver transplant status                                                                        |
| Z94.8 | Other transplanted organ and tissue status                                                     |
| Z94.9 | Transplanted organ and tissue status, unspecified                                              |

## Operations

*Procedure codes for laparotomy and operation types.* Laparotomy codes are the total of codes in tables 6-19. Note that a last code digit of 0, 3 or 6 signifies an open or other non-endoscopic operation or procedure, except for peripheral vascular surgery.

*Table 6. NCSP-N codes for reclosure procedures*

| Code  | Title                                                                            |
|-------|----------------------------------------------------------------------------------|
| JWA00 | Repair of wound dehiscence in gastroenterological surgery                        |
| KWA00 | Repair of wound dehiscence in urological surgery                                 |
| LWA00 | Repair of wound dehiscence in gynaecological surgery                             |
| PWA00 | Repair of wound dehiscence in surgery of peripheral vessels and lymphatic system |

*Table 7. NCSP-N code for exploratory laparotomy and opening of abdominal cavity*

| Code  | Title                      |
|-------|----------------------------|
| JAA00 | Incision of abdominal wall |
| JAH00 | Laparotomy                 |
| JAH20 | Staging laparotomy         |
| JAH30 | Laparostomy                |
| JAH33 | Opening of laparostomy     |
| JAH40 | Thoracolumbarotomy         |

*Table 8. NCSP-N codes for diaphragmal hernia repair*

| Code  | Title                                     |
|-------|-------------------------------------------|
| JBB00 | Repair of paraoesophageal hernia          |
| JBB10 | Repair of congenital diaphragmatic hernia |
| JBB96 | Repair of other diaphragmatic hernia      |
| JBC00 | Gastro-oesophageal antireflux operation   |

*Table 9. NCSP-N codes for repair of thoracoabdominal aorta*

| Code  | Title                                                                   |
|-------|-------------------------------------------------------------------------|
| FCD00 | Suture of thoracoabdominal aorta                                        |
| FCD10 | Reinforcement of thoracoabdominal aorta using suture                    |
| FCD30 | Repair of thoracoabdominal aorta using patch                            |
| FCD40 | Partial resection and suture of thoracoabdominal aorta                  |
| FCD50 | Resection and reconstruction of thoracoabdominal aorta using tube graft |
| FCD60 | Resection of thoracoabdominal aorta and reimplantation of branches      |
| FCD70 | Bypass of thoracoabdominal aorta using tube graft                       |
| FCD80 | Removal of foreign body from thoracoabdominal aorta                     |
| FCD96 | Other repair of thoracoabdominal aorta                                  |

*Table 10. NCSP-N codes for procedures on the gastrointestinal tract: oesophagus, stomach and intestines*

| <b>Code</b> | <b>Title</b>                                                                        |
|-------------|-------------------------------------------------------------------------------------|
| JCB00       | Oesophagostomy                                                                      |
| JCC00       | Transhiatal partial oesophagectomy without interposition                            |
| JCC10       | Transthoracic partial oesophagectomy without interposition                          |
| JCC20       | Transhiatal partial oesophagectomy with interposition of intestine                  |
| JCC30       | Transthoracic partial oesophagectomy with interposition of intestine                |
| JCC96       | Other partial oesophagectomy                                                        |
| JCD00       | Subcutaneous anastomosis of oesophagus without interposition                        |
| JCD03       | Subcutaneous anastomosis of oesophagus with interposition of intestine              |
| JCD10       | Intrathoracic anastomosis of oesophagus without interposition                       |
| JCD13       | Intrathoracic oesophageal anastomosis with interposition of intestine               |
| JCD20       | Transsection of oesophagus                                                          |
| JCD96       | Other anastomosis of oesophagus without resection                                   |
| JCE00       | Suture of oesophagus                                                                |
| JCE10       | Plastic repair of stenosis of cardia                                                |
| JCE20       | Cardiomyotomy                                                                       |
| JCE30       | Repair of oesophageal atresia or congenital tracheo-oesophageal fistula             |
| JCE33       | Closure of acquired tracheo-oesophageal or broncho-oesophageal fistula              |
| JCE40       | Reconstruction of oesophagus using flap                                             |
| JCE50       | Reconstruction of oesophagus using free microvascular graft of intestine            |
| JCE96       | Other reconstruction of oesophagus                                                  |
| JCF00       | Insertion of oesophageal stent                                                      |
| JCW96       | Other operation on oesophagus                                                       |
| JDA00       | Gastrotomy                                                                          |
| JDA60       | Closure of perforated ulcer of stomach                                              |
| JDA63       | Local excision of lesion of stomach                                                 |
| JDB00       | Gastrostomy                                                                         |
| JDB10       | Percutaneous gastrostomy                                                            |
| JDC00       | Partial gastrectomy and gastroduodenostomy                                          |
| JDC10       | Partial gastrectomy and gastrojejunostomy                                           |
| JDC20       | Partial gastrectomy and Roux-en-Y reconstruction                                    |
| JDC30       | Partial gastrectomy with interposition of jejunum                                   |
| JDC40       | Partial gastrectomy and oesophagogastrostomy                                        |
| JDC96       | Partial gastrectomy with other reconstruction                                       |
| JDD00       | Total gastrectomy and Roux-en-Y oesophagojejunostomy                                |
| JDD96       | Total gastrectomy with other reconstruction                                         |
| JDE00       | Gastrojejunostomy                                                                   |
| JDE10       | Conversion of gastrojejunostomy to Roux-en-Y anastomosis                            |
| JDE20       | Conversion of gastrojejunostomy to gastroduodenostomy with interposition of jejunum |
| JDE96       | Other anastomosis of stomach without concurrent gastrectomy                         |
| JDF00       | Gastroplasty                                                                        |

| Code  | Title                                                                        |
|-------|------------------------------------------------------------------------------|
| JDF10 | Gastric bypass                                                               |
| JDF20 | Gastric banding                                                              |
| JDF96 | Other bariatric operation on stomach                                         |
| JDG00 | Truncal vagotomy                                                             |
| JDG10 | Proximal gastric vagotomy                                                    |
| JDG96 | Other vagotomy                                                               |
| JDH00 | Duodenotomy                                                                  |
| JDH40 | Duodenostomy on duodenal bulb                                                |
| JDH50 | Local excision of lesion of duodenal bulb                                    |
| JDH60 | Pyloromyotomy                                                                |
| JDH63 | Pyloroplasty                                                                 |
| JDH70 | Closure of perforated ulcer of duodenum                                      |
| JDW96 | Other operation on stomach or duodenum                                       |
| JEA00 | Appendectomy                                                                 |
| JEA10 | Appendectomy with drainage                                                   |
| JEW96 | Other operation on appendix                                                  |
| JFA00 | Enterotomy                                                                   |
| JFA10 | Colotomy                                                                     |
| JFA16 | Biopsy of wall of colon without colotomy                                     |
| JFA60 | Stricturoplasty in small intestine                                           |
| JFA63 | Stricturoplasty in colon                                                     |
| JFA70 | Suture of small intestine                                                    |
| JFA73 | Excision of lesion of small intestine                                        |
| JFA76 | Closure of fistula of small intestine                                        |
| JFA80 | Suture of colon                                                              |
| JFA83 | Excision of lesion of colon                                                  |
| JFA86 | Closure of fistula of colon                                                  |
| JFA96 | Other local operation on intestine                                           |
| JFB00 | Partial resection of small intestine                                         |
| JFB10 | Reversal of segment of small intestine                                       |
| JFB13 | Plastic repair of small intestine with lengthening                           |
| JFB20 | Ileocaecal resection                                                         |
| JFB30 | Right hemicolectomy                                                          |
| JFB33 | Other resection comprising small intestine and colon                         |
| JFB40 | Resection of transverse colon                                                |
| JFB43 | Left hemicolectomy                                                           |
| JFB46 | Resection of sigmoid colon                                                   |
| JFB50 | Other resection of colon                                                     |
| JFB53 | Resection of sigmoid colon sigmoideum with partial resection of rectum       |
| JFB60 | Resection of sigmoid colon with end colostomy                                |
| JFB63 | Other resection of colon with proximal colostomy and closure of distal stump |
| JFB96 | Other partial excision of intestine                                          |
| JFC00 | Entero-enterostomy                                                           |
| JFC10 | Ileotransversostomy                                                          |

| Code  | Title                                                                    |
|-------|--------------------------------------------------------------------------|
| JFC20 | Other enterocolostomy                                                    |
| JFC30 | Colo-colostomy                                                           |
| JFC40 | Ileorectostomy                                                           |
| JFC50 | Colorectostomy                                                           |
| JFD00 | Jejunioileal bypass                                                      |
| JFD03 | Duodenoileal bypass with biliopancreatic diversion                       |
| JFD10 | Revision of jejunioileal bypass                                          |
| JFD13 | Revision of duodenoileal bypass                                          |
| JFD20 | Restoration of continuity after jejunioileal bypass                      |
| JFD23 | Restoration of continuity after duodenoileal bypass                      |
| JFD96 | Other intestinal bypass operation                                        |
| JFE00 | Transplantation of small intestine                                       |
| JFE96 | Other operation relating to transplantation of small intestine           |
| JFF00 | Catheter enterostomy                                                     |
| JFF10 | Loop enterostomy                                                         |
| JFF13 | Terminal enterostomy                                                     |
| JFF16 | Conversion of ileoanal anastomosis to ileostomy                          |
| JFF20 | Caecostomy                                                               |
| JFF23 | Transversostomy                                                          |
| JFF26 | Sigmoidostomy                                                            |
| JFF30 | Other colostomy                                                          |
| JFF40 | Appendicostomy                                                           |
| JFF50 | Exteriorisation of loop of colon without opening                         |
| JFF60 | Opening of exteriorised loop of colon                                    |
| JFF96 | Other exteriorisation of intestine or creation of intestinal stoma       |
| JFG00 | Closure of loop enterostomy without resection                            |
| JFG10 | Closure of loop colostomy without resection                              |
| JFG20 | Closure of enterostomy with resection of exteriorised loop               |
| JFG23 | Closure of terminal enterostomy with anastomosis to small intestine      |
| JFG26 | Closure of terminal enterostomy with anastomosis to colon                |
| JFG30 | Closure of colostomy with resection of exteriorised loop                 |
| JFG33 | Closure of terminal colostomy with anastomosis to colon                  |
| JFG36 | Closure of terminal colostomy with anastomosis to rectum                 |
| JFG40 | Revision of enterostomy or colostomy without laparotomy                  |
| JFG50 | Laparotomy with revision of enterostomy or colostomy                     |
| JFG53 | Revision of ileal pelvic pouch                                           |
| JFG56 | Revision of colonic pelvic pouch                                         |
| JFG60 | Conversion of conventional ileostomy to continent ileostomy              |
| JFG70 | Conversion of continent ileostomy to conventional ileostomy              |
| JFG73 | Excision of ileal pelvic pouch                                           |
| JFG76 | Excision of colonic pelvic pouch with colorectal or coloanal anastomosis |
| JFG80 | Excision of ileal pouch with construction of new continent ileostomy     |
| JFG83 | Excision of colonic pelvic pouch and construction of new pouch           |
| JFG86 | Excision of ileal pelvic pouch and construction of new pouch             |



| Code  | Title                                                                                |
|-------|--------------------------------------------------------------------------------------|
| JFG96 | Other operation on intestinal stoma or pouch                                         |
| JFH00 | Total colectomy and ileorectal anastomosis                                           |
| JFH10 | Total colectomy and ileostomy                                                        |
| JFH20 | Proctocolectomy and ileostomy                                                        |
| JFH30 | Total colectomy, mucosal proctectomy and ileoanal anastomosis without ileostomy      |
| JFH33 | Total colectomy, mucosal proctectomy, ileoanal anastomosis and ileostomy             |
| JFH40 | Proctocolectomy and continent ileostomy                                              |
| JFH96 | Other total colectomy                                                                |
| JFJ00 | Coecopexy                                                                            |
| JFJ96 | Other enteropexy or colopexy                                                         |
| JFK00 | Division of adhesive band in intestinal obstruction                                  |
| JFK10 | Freeing of adhesions in intestinal obstruction                                       |
| JFK20 | Freeing of adhesions and plication of small intestine                                |
| JFK96 | Other operation on adhesions in intestinal obstruction                               |
| JFL00 | Open reduction of intussusception of intestine                                       |
| JFL10 | Laparotomy and manipulation of obstructed intestine                                  |
| JFL20 | Laparotomy and manipulation of impacted material                                     |
| JFL96 | Other operation for intestinal obstruction without resection or freeing of adhesions |
| JFW96 | Other operation on intestine                                                         |
| JGA00 | Proctotomy                                                                           |
| JGA60 | Suture of rectum                                                                     |
| JGA70 | Proctotomy and excision of lesion of rectum                                          |
| JGA96 | Other proctotomy or local operation on rectum                                        |
| JGB00 | Partial proctectomy and colorectal or coloanal anastomosis                           |
| JGB03 | Partial proctectomy with partial excision of mesorectum                              |
| JGB06 | Total mesorectal excision                                                            |
| JGB10 | Partial proctectomy and end colostomy                                                |
| JGB20 | Partial rectosigmoidectomy and abdominoperineal pull-through anastomosis             |
| JGB30 | Abdominoperineal excision of rectum                                                  |
| JGB33 | Abdominoperineal excision of rectum and intersphincter resection                     |
| JGB36 | Wide excision of rectum                                                              |
| JGB40 | Excision of rectum and end ileostomy                                                 |
| JGB50 | Mucosal proctectomy and ileoanal anastomosis                                         |
| JGB60 | Excision of rectum and ileoanal anastomosis                                          |
| JGB96 | Other proctectomy or excision of rectum                                              |
| JGC00 | Rectopexy                                                                            |
| JGC30 | Excision and suture of rectal mucosa with imbrication of muscular layer              |
| JGC96 | Other reconstructive operation on rectum                                             |
| JGW96 | Other operation on rectum                                                            |

Table 11. NCSP-N codes for procedures on the liver

| Code  | Title                                                        |
|-------|--------------------------------------------------------------|
| JJA00 | Exploration of liver                                         |
| JJA10 | Hepatotomy                                                   |
| JJA20 | Open biopsy of liver                                         |
| JJA23 | Open needle biopsy of liver                                  |
| JJA30 | Fenestration of cyst of liver                                |
| JJA40 | Excision of lesion of liver                                  |
| JJA43 | Destruction of lesion of liver                               |
| JJA50 | Suture of liver                                              |
| JJA96 | Other local operation on liver                               |
| JJB00 | Wedge resection of liver                                     |
| JJB10 | Atypical resection of liver                                  |
| JJB20 | Excision of single segment of liver                          |
| JJB30 | Excision of two segments of liver                            |
| JJB40 | Excision of segments II, III and IV of liver                 |
| JJB50 | Excision of segments V, VI, VII and VIII of liver            |
| JJB53 | Excision of segments IV,V, VI, VII and VIII of liver         |
| JJB60 | Other excision of three or more segments of liver            |
| JJB96 | Other resection of liver                                     |
| JJC00 | Allogenic transplantation of liver                           |
| JJC10 | Allogenic partial transplantation of liver                   |
| JJC20 | Allogenic partial transplantation of liver from living donor |
| JJC30 | Xenogenic transplantation of liver                           |
| JJC40 | Xenogenic partial transplantation of liver                   |
| JJC50 | Resection of transplanted liver                              |
| JJC60 | Total excision of transplanted liver                         |
| JJC96 | Other transplantation of liver or related operation          |
| JJW96 | Other operation on liver                                     |

Table 12. NCSP-N codes for procedures on biliary tract

| Code  | Title                                              |
|-------|----------------------------------------------------|
| JKA00 | Cholecystotomy                                     |
| JKA10 | Cholecystostomy                                    |
| JKA20 | Cholecystectomy                                    |
| JKA96 | Other operation on gallbladder                     |
| JKB00 | Incision of bile duct                              |
| JKB20 | Intraoperative cholangioscopy                      |
| JKB30 | Percutaneous transhepatic biliary drainage         |
| JKB40 | Suture of bile duct                                |
| JKB96 | Other incision or related operation on bile duct   |
| JKC00 | Incision of bile duct and local excision of lesion |
| JKC10 | Partial excision and anastomosis of bile duct      |

| Code  | Title                                                                            |
|-------|----------------------------------------------------------------------------------|
| JKC20 | Partial excision of bile duct and anastomosis to duodenum                        |
| JKC30 | Partial excision of bile duct and anastomosis to jejunum                         |
| JKC40 | Partial excision of right or left hepatic duct and anastomosis to jejunum        |
| JKC50 | Excision of papilla of Vater and anastomosis of bile duct to duodenum or jejunum |
| JKC96 | Other excision of bile duct                                                      |
| JKD00 | Anastomosis of gallbladder to jejunum                                            |
| JKD10 | Anastomosis of bile duct to duodenum                                             |
| JKD20 | Anastomosis of bile duct to jejunum                                              |
| JKD30 | Extrahepatic anastomosis of right or left hepatic duct to jejunum                |
| JKD40 | Anastomosis of intrahepatic bile duct to jejunum                                 |
| JKD50 | Hepatoportoenterostomy                                                           |
| JKD96 | Other biliodigestive anastomosis without excision                                |
| JKE00 | Transduodenal papillotomy                                                        |
| JKE06 | Transduodenal sphincteroplasty                                                   |
| JKE96 | Other transduodenal open operation on bile duct or ampulla of Vater              |
| JKF00 | Excision of cystic duct                                                          |
| JKF96 | Other secondary operation on biliary tract                                       |
| JKW96 | Other operation on biliary tract                                                 |

Table 13. NCSP-N codes for procedures on the pancreas

| Code  | Title                                                                   |
|-------|-------------------------------------------------------------------------|
| JLA00 | Exploration of pancreas                                                 |
| JLA10 | Biopsy of pancreas                                                      |
| JLB00 | Incision of pancreas                                                    |
| JLB10 | Pancreaticolithotomy                                                    |
| JLB96 | Other incision, drainage or dilatation of pancreas                      |
| JLC00 | Excision of lesion of pancreas                                          |
| JLC10 | Distal pancreatectomy                                                   |
| JLC20 | Total pancreatectomy                                                    |
| JLC30 | Pancreatoduodenectomy                                                   |
| JLC40 | Total pancreatoduodenectomy                                             |
| JLC50 | Atypical pancreatectomy                                                 |
| JLC96 | Other pancreatectomy                                                    |
| JLD00 | Pancreaticojejunostomy                                                  |
| JLD10 | Anastomosis of pancreatic pseudocyst to stomach                         |
| JLD20 | Anastomosis of pancreatic pseudocyst to jejunum                         |
| JLE00 | Allogenic total transplantation of pancreas with pancreaticocystostomy  |
| JLE03 | Allogenic total transplantation of pancreas with pancreaticoenterostomy |
| JLE10 | Allogenic segmental transplantation of pancreas                         |
| JLE16 | Allogenic segmental transplantation of pancreas from living donor       |
| JLE20 | Allogenic islet cell transplantation                                    |
| JLE30 | Xenogenic islet cell transplantation                                    |

| Code  | Title                                                         |
|-------|---------------------------------------------------------------|
| JLE40 | Total excision of transplanted pancreas                       |
| JLE50 | Occlusion of duct of transplanted pancreas                    |
| JLE56 | Conversion of pancreaticocystostomy to pancreaticoenterostomy |
| JLE96 | Other transplantation of pancreas or related operation        |
| JLW96 | Other operation on pancreas                                   |

Table 14. NCSP-N codes for procedures on the spleen

| Code  | Title                            |
|-------|----------------------------------|
| JMA00 | Partial splenectomy              |
| JMA10 | Transabdominal total splenectomy |
| JMA20 | Transthoracic total splenectomy  |
| JMB00 | Biopsy of spleen                 |
| JMB10 | Repair of spleen                 |
| JMW96 | Other operation on spleen        |

Table 15. NCSP-N codes for other digestive system procedures

| Code  | Title                                                                      |
|-------|----------------------------------------------------------------------------|
| JAA10 | Excision of lesion of abdominal wall                                       |
| JAA13 | Wide excision of extensive necrotising conditions of abdominal wall        |
| JAA96 | Other local operation on abdominal wall                                    |
| JAK00 | Laparotomy and drainage of peritoneal cavity                               |
| JAK03 | Laparotomy and peritoneal irrigation                                       |
| JAK10 | Laparotomy and insertion of peritoneal dialysis catheter                   |
| JAL00 | Biopsy of peritoneum                                                       |
| JAL10 | Laparotomy and removal of foreign body                                     |
| JAL20 | Excision or destruction of lesion of peritoneum                            |
| JAL23 | Excision of local lesion of pelvic wall                                    |
| JAL30 | Omentectomy                                                                |
| JAL50 | Intraabdominal revision of shunt of ventricle of brain                     |
| JAL96 | Other excision of lesion of peritoneum                                     |
| JAM00 | Transposition of omentum                                                   |
| JAM10 | Operation for malrotation of intestine                                     |
| JAN00 | Creation of peritoneovenous shunt                                          |
| JAN10 | Revision of peritoneovenous shunt                                          |
| JAN20 | Removal of peritoneovenous shunt                                           |
| JAP00 | Freeing of adhesions in the peritoneal cavity                              |
| JAQ00 | Extensive excision of peritoneum                                           |
| JAQ10 | Intraoperative hyperthermic chemotherapeutic perfusion of abdominal cavity |
| JAW96 | Other operation on abdominal wall, peritoneum, mesentery or omentum        |
| JBA00 | Transabdominal repair of diaphragm for rupture                             |

| Code  | Title                                                                                  |
|-------|----------------------------------------------------------------------------------------|
| JBA10 | Transabdominal biopsy or excision of lesion of diaphragm                               |
| JBA20 | Transabdominal partial excision of diaphragm                                           |
| JBW96 | Other transabdominal operation on diaphragm or operation for gastro-oesophageal reflux |

Table 16. NCSP-N codes for procedures on kidney and pelvis of kidney

| Code  | Title                                                                                   |
|-------|-----------------------------------------------------------------------------------------|
| KAA00 | Exploration of kidney                                                                   |
| KAA20 | Exploratory nephrotomy                                                                  |
| KAA30 | Exploratory pyelotomy                                                                   |
| KAA96 | Other exploration of kidney or pelvis of kidney                                         |
| KAB00 | Biopsy of kidney or pelvis of kidney                                                    |
| KAC00 | Nephrectomy                                                                             |
| KAC20 | Nephroureterectomy                                                                      |
| KAD00 | Partial nephrectomy                                                                     |
| KAD10 | Heminephrectomy                                                                         |
| KAD40 | Partial excision of pelvis of kidney                                                    |
| KAD50 | Destruction of tumour of pelvis of kidney                                               |
| KAD56 | Destruction of lesion of renal parenchyma                                               |
| KAD60 | Percutaneous destruction of lesion of renal parenchyma                                  |
| KAD96 | Other partial excision of kidney or pelvis of kidney                                    |
| KAE00 | Nephrolithotomy                                                                         |
| KAE10 | Pyelolithotomy                                                                          |
| KAE96 | Other removal of calculus from kidney or pelvis of kidney                               |
| KAF00 | Removal of foreign body from kidney                                                     |
| KAF10 | Removal of foreign body from pelvis of kidney                                           |
| KAH00 | Suture of kidney                                                                        |
| KAH10 | Suture of pelvis of kidney                                                              |
| KAH30 | Pyeloureteroplasty without division of ureteropelvic junction                           |
| KAH40 | Pyeloureteroplasty with division of ureteropelvic junction                              |
| KAH50 | Ureterocalyceal anastomosis                                                             |
| KAH70 | Freeing of adhesions of ureteropelvic junction                                          |
| KAH80 | Nephropexy                                                                              |
| KAH96 | Other reconstruction of kidney or pelvis of kidney                                      |
| KAS00 | Autotransplantation of kidney                                                           |
| KAS10 | Allogenic transplantation of kidney from cadaver donor                                  |
| KAS13 | Allogenic transplantation of kidney from cadaver donor                                  |
| KAS20 | Allogenic transplantation of kidney from living donor with minimally invasive technique |
| KAS23 | Allogenic transplantation of kidney from living donor with minimally invasive technique |
| KAS40 | Excision of transplanted kidney                                                         |
| KAS50 | Nephrocystostomy in transplanted kidney                                                 |
| KAS60 | Operation for lymphocele of transplanted kidney                                         |
| KAS96 | Other transplantation of kidney or related procedure                                    |
| KAW96 | Other operation on kidney or pelvis of kidney                                           |

*Table 17. NCSP-N codes for procedures on other urinary and male genital organs: ureter, bladder, urethra, prostate and seminal vesicles*

| <b>Code</b> | <b>Title</b>                                                        |
|-------------|---------------------------------------------------------------------|
| KBA00       | Exploration of ureter                                               |
| KBA10       | Exploratory ureterotomy                                             |
| KBA96       | Other exploration of ureter                                         |
| KBB00       | Biopsy of ureter                                                    |
| KBC00       | Ureterectomy                                                        |
| KBD00       | Partial excision of ureter                                          |
| KBD20       | Destruction of tumour of ureter                                     |
| KBD30       | Excision of stump of ureter                                         |
| KBD96       | Other partial excision of ureter or destruction of tumour of ureter |
| KBE00       | Ureterolithotomy                                                    |
| KBE96       | Other operation for calculus of ureter                              |
| KBF00       | Removal of foreign body from ureter                                 |
| KBH00       | Suture of ureter                                                    |
| KBH06       | Ureteroureterostomy                                                 |
| KBH10       | Connection of ureter to contralateral ureter                        |
| KBH20       | Replantation of ureter                                              |
| KBH30       | Ileal replacement of ureter                                         |
| KBH40       | Plastic repair of ureter                                            |
| KBH50       | Ureterolysis                                                        |
| KBH96       | Other repair or connection of ureter                                |
| KBJ00       | Cutaneous ureterostomy                                              |
| KBJ10       | Cutaneous ureteroenterostomy                                        |
| KBJ20       | Cutaneous ureteroenterostomy with reservoir                         |
| KBJ40       | Ureteroenterostomy                                                  |
| KBJ60       | Anastomosis of ureter to urethra with interposition of ileum        |
| KBJ70       | Removal of calculus from ileal conduit or reservoir                 |
| KBJ80       | Operation for malfunction of urinary diversion                      |
| KBJ96       | Other urinary diversion from ureter or related operation            |
| KBV00       | Insertion of stent into ureter                                      |
| KBV10       | Removal of stent from ureter                                        |
| KBV40       | Incision or excision of ureterocele                                 |
| KBW96       | Other operation on ureter                                           |
| KCA00       | Exploratory cystotomy                                               |
| KCB00       | Biopsy of bladder                                                   |
| KCC00       | Cystectomy                                                          |
| KCC10       | Cystoprostatectomy                                                  |
| KCC20       | Cystoprostatourethrectomy                                           |
| KCC30       | Cystectomy with excision of female internal genital organs          |
| KCC96       | Other cystectomy                                                    |
| KCD10       | Partial cystectomy                                                  |
| KCD20       | Excision of diverticulum of bladder                                 |
| KCD30       | Destruction of tumour of bladder                                    |

| <b>Code</b> | <b>Title</b>                                                           |
|-------------|------------------------------------------------------------------------|
| KCD40       | Excision of urachus or other vesicocutaneous fistula                   |
| KCD96       | Other partial excision or destruction of tumour of bladder             |
| KCE00       | Cystolithotomy                                                         |
| KCF00       | Cystotomy and removal of foreign body from bladder                     |
| KCH00       | Suture of bladder                                                      |
| KCH10       | Enterocystoplasty                                                      |
| KCH20       | Reduction cystoplasty                                                  |
| KCH30       | Closure of vesicointestinal fistula                                    |
| KCH40       | Incision or resection of bladder neck                                  |
| KCH96       | Other reconstructive operation on bladder                              |
| KCJ00       | Cystostomy                                                             |
| KCJ10       | Cutaneous cystoenterostomy                                             |
| KCJ20       | Continent cutaneous cystoenterostomy                                   |
| KCJ96       | Other cystostomy                                                       |
| KCV10       | Denervation of bladder                                                 |
| KCV20       | Freeing of bladder                                                     |
| KCW96       | Other operations on bladder                                            |
| KDC00       | Urethrectomy                                                           |
| KDD00       | Partial excision of urethra                                            |
| KDD10       | Excision of diverticulum of urethra                                    |
| KDD30       | Destruction of tumour of urethra                                       |
| KDD40       | Resection of external sphincter of urethra                             |
| KDD50       | Excision of urethral valve                                             |
| KDD80       | Partial excision of urethra and repair using graft or flap             |
| KDD96       | Other partial excision of urethra                                      |
| KDG00       | Retropubic suspension of urethra                                       |
| KDG20       | Abdominal colposuspension                                              |
| KDG30       | Suprapubic sling urethrocystopexy                                      |
| KDG40       | Suprapubic urethrocystopexy                                            |
| KDG43       | Transobturatorial sling urethrocystopexy                               |
| KDG50       | Transabdominal plastic repair of pelvic floor for urinary incontinence |
| KDG60       | Implantation of adjustable expander around bladder neck                |
| KDG70       | Exploration of urethra                                                 |
| KDG96       | Other operation on urethra or bladder neck for incontinence            |
| KDH00       | Suture of urethra                                                      |
| KDH10       | Meatoplasty of urethra                                                 |
| KDH30       | Closure of urethrocutaneous fistula                                    |
| KDH50       | Closure of urethrointestinal fistula                                   |
| KDH70       | Plastic repair of stricture of urethra                                 |
| KDH96       | Other reconstructive operation on urethra                              |
| KDJ00       | Urethrostomy                                                           |
| KDK00       | Implantation of artificial urinary sphincter around bladder neck       |
| KDK10       | Implantation of artificial urinary sphincter around bulbar urethra     |
| KDK30       | Revision of artificial urethral sphincter                              |

| Code  | Title                                          |
|-------|------------------------------------------------|
| KDK40 | Removal of artificial urethral sphincter       |
| KDW96 | Other operation on urethra                     |
| KEA00 | Exploration of prostate                        |
| KEA10 | Prostatotomy                                   |
| KEA20 | Incision of seminal vesicle                    |
| KEB00 | Biopsy of prostate                             |
| KED96 | Other partial excision of prostate             |
| KEE00 | Prostatalithotomy                              |
| KEE10 | Removal of foreign body from prostate          |
| KEW96 | Other operation on prostate or seminal vesicle |

*Table 18- NCSP-N codes for procedures on female genital organs: ovary, fallopian tube, uterus and uterine ligaments*

| Code  | Title                                                 |
|-------|-------------------------------------------------------|
| LAA00 | Puncture of ovarian cyst                              |
| LAB00 | Ovariectomy                                           |
| LAB10 | Biopsy of ovary                                       |
| LAB96 | Other incision or biopsy of ovary                     |
| LAC00 | Excision of ovarian cyst                              |
| LAC10 | Fenestration of ovarian cyst                          |
| LAC20 | Destruction of lesion of ovary                        |
| LAC30 | Excision of paraovarian cyst                          |
| LAC96 | Other excision or destruction of lesion of ovary      |
| LAD00 | Partial excision of ovary                             |
| LAE10 | Unilateral oophorectomy                               |
| LAE20 | Bilateral oophorectomy                                |
| LAF00 | Unilateral salpingo-oophorectomy                      |
| LAF10 | Bilateral salpingo-oophorectomy                       |
| LAF20 | Unilateral transvaginal salpingo-oophorectomy         |
| LAF30 | Bilateral transvaginal salpingo-oophorectomy          |
| LAG00 | Freeing of adhesions of ovary                         |
| LAG10 | Oophoropexy                                           |
| LAG20 | Detorsion of ovary                                    |
| LAG96 | Other reconstructive operation on ovary               |
| LAW96 | Other operation on ovary                              |
| LBB00 | Biopsy of Fallopian tube                              |
| LBB96 | Other biopsy of Fallopian tube                        |
| LBC10 | Removal of products of conception from Fallopian tube |
| LBC20 | Salpingotomy and removal of products of conception    |
| LBC96 | Other tube conserving operation for tubal pregnancy   |
| LBD00 | Partial excision of Fallopian tube                    |
| LBE00 | Salpingectomy                                         |
| LBF00 | Perfusion of Fallopian tube                           |



| <b>Code</b> | <b>Title</b>                                          |
|-------------|-------------------------------------------------------|
| LBF03       | Perfusion of Fallopian tube after reconstruction      |
| LBF20       | Transcervical catheter salpingoplasty                 |
| LBF30       | Salpingolysis                                         |
| LBF40       | Fimbrioplasty                                         |
| LBF50       | Salpingostomy                                         |
| LBF60       | Partial excision and anastomosis of Fallopian tube    |
| LBF70       | Partial excision and reimplantation of Fallopian tube |
| LBF96       | Other operation on Fallopian tube for infertility     |
| LBW96       | Other operation on Fallopian tube                     |
| LCA00       | Biopsy of uterus or uterine ligaments                 |
| LCB00       | Hysterotomy                                           |
| LCB10       | Myomectomy                                            |
| LCB96       | Other excision of lesion of uterus                    |
| LCC00       | Partial excision of uterus                            |
| LCC10       | Supravaginal hysterectomy                             |
| LCC20       | Vaginal supravaginal hysterectomy                     |
| LCC96       | Other partial excision of uterus                      |
| LCD00       | Hysterectomy                                          |
| LCD10       | Vaginal hysterectomy                                  |
| LCD30       | Radical hysterectomy                                  |
| LCD40       | Radical vaginal hysterectomy                          |
| LCD96       | Other hysterectomy                                    |
| LCE00       | Anterior exenteration of female pelvis                |
| LCE10       | Posterior exenteration of female pelvis               |
| LCE20       | Total exenteration of female pelvis                   |
| LCE96       | Other exenteration of female pelvis                   |
| LCF00       | Excision of lesion of parametrium                     |
| LCF10       | Excision of female varicocele                         |
| LCF96       | Other excision of lesion of parametrium               |
| LCG10       | Suture of uterus                                      |
| LCG20       | Hysteropexy                                           |
| LCG30       | Resection or transcision of sacrouterine ligaments    |
| LCG40       | Reconstruction of uterus                              |
| LCG96       | Other reconstructive operation on uterus              |
| LCW96       | Other operation on uterus and uterine ligaments       |

Table 19. NCSP-N codes for procedures on the peripheral vessels of the abdomen

| Code  | Title                                                                                                       |
|-------|-------------------------------------------------------------------------------------------------------------|
| PCB20 | Ligature of coeliac trunk and branches                                                                      |
| PCB30 | Ligature of superior mesenteric artery                                                                      |
| PCB40 | Ligature of renal artery                                                                                    |
| PCB99 | Ligature of other visceral artery                                                                           |
| PCC10 | Suture of suprarenal or juxtarenal abdominal aorta                                                          |
| PCC20 | Suture of coeliac trunk and branches                                                                        |
| PCC30 | Suture of superior mesenteric artery                                                                        |
| PCC40 | Suture of renal artery                                                                                      |
| PCC99 | Suture of other visceral artery                                                                             |
| PCE30 | Thrombectomy or embolectomy of superior mesenteric artery                                                   |
| PCE40 | Thrombectomy or embolectomy of renal artery                                                                 |
| PCE99 | Thrombectomy or embolectomy of other visceral artery                                                        |
| PCF20 | Thrombendarterectomy of coeliac trunk and branches                                                          |
| PCF30 | Thrombendarterectomy of superior mesenteric artery                                                          |
| PCF40 | Thrombendarterectomy of renal artery                                                                        |
| PCF99 | Thrombendarterectomy of other visceral artery                                                               |
| PCG10 | Operation for aneurysm of supracoeliac or juxtarenal abdominal aorta                                        |
| PCG20 | Operation for aneurysm of coeliac trunk and branches                                                        |
| PCG30 | Operation for aneurysm of superior mesenteric artery                                                        |
| PCG40 | Operation for aneurysm of renal artery                                                                      |
| PCG99 | Operation for aneurysm of other visceral artery                                                             |
| PCH10 | Bypass from supracoeliac or juxtarenal abdominal aorta                                                      |
| PCH20 | Bypass to/from coeliac trunk and branches                                                                   |
| PCH30 | Bypass from superior mesenteric artery                                                                      |
| PCH40 | Bypass from renal artery                                                                                    |
| PCH99 | Bypass from other visceral artery                                                                           |
| PCJ30 | Transposition of superior mesenteric artery                                                                 |
| PCJ40 | Transposition of renal artery                                                                               |
| PCJ99 | Transposition of other visceral artery                                                                      |
| PCK20 | Reimplantation of coeliac trunk and branches                                                                |
| PCK30 | Reimplantation of superior mesenteric artery                                                                |
| PCK40 | Reimplantation of renal artery                                                                              |
| PCK50 | Reimplantation of inferior mesenteric artery                                                                |
| PCK99 | Reimplantation of other visceral artery                                                                     |
| PCN20 | Plastic repair of coeliac trunk and branches                                                                |
| PCN30 | Plastic repair of superior mesenteric artery                                                                |
| PCN40 | Plastic repair of renal artery                                                                              |
| PCN99 | Plastic repair of other visceral artery                                                                     |
| PCU70 | Exploration of previous reconstruction of suprarenal abdominal aorta or visceral arteries                   |
| PCU74 | Thrombectomy or embolectomy in bypass from suprarenal abdominal aorta and visceral arteries                 |
| PCU81 | Closure of persisting arteriovenous fistula of bypass from suprarenal abdominal aorta and visceral arteries |
| PCU82 | Plastic repair in bypass from suprarenal abdominal aorta and visceral arteries                              |
| PCU99 | Other repair after previous reconstruction of suprarenal abdominal aorta and visceral arteries              |

| Code  | Title                                                                                                         |
|-------|---------------------------------------------------------------------------------------------------------------|
| PCW99 | Other operation on suprarenal abdominal aorta and visceral arteries                                           |
| PDA10 | Exploration of infrarenal abdominal aorta                                                                     |
| PDA30 | Exploration of iliac artery                                                                                   |
| PDC10 | Suture of infrarenal abdominal aorta                                                                          |
| PDC30 | Suture of iliac artery                                                                                        |
| PDE10 | Thrombectomy or embolectomy of infrarenal abdominal aorta                                                     |
| PDE30 | Thrombectomy or embolectomy of iliac artery                                                                   |
| PDF10 | Thrombendarterectomy of infrarenal abdominal aorta                                                            |
| PDF30 | Thrombendarterectomy of iliac artery                                                                          |
| PDG10 | Operation on infrarenal abdominal aorta for aneurysm                                                          |
| PDG20 | Bypass from aorta to iliac artery for aneurysm                                                                |
| PDG21 | Bypass from aorta to bilateral iliac arteries for aneurysm                                                    |
| PDG22 | Bypass from aorta to iliac and contralateral femoral artery for aneurysm                                      |
| PDG23 | Bypass from aorta to femoral artery for aneurysm                                                              |
| PDG24 | Bypass from aorta to bilateral femoral arteries for aneurysm                                                  |
| PDG30 | Operation on iliac artery for aneurysm                                                                        |
| PDG35 | Bypass from iliac to femoral artery for aneurysm                                                              |
| PDG99 | Other operation for aneurysm of infrarenal abdominal aorta and iliac arteries                                 |
| PDH10 | Bypass from infrarenal abdominal aorta                                                                        |
| PDH20 | Bypass from aorta to iliac artery                                                                             |
| PDH21 | Bypass from aorta to bilateral iliac arteries                                                                 |
| PDH22 | Bypass from aorta to iliac and contralateral femoral artery                                                   |
| PDH23 | Bypass from aorta to femoral artery                                                                           |
| PDH24 | Bypass from aorta to bilateral femoral arteries                                                               |
| PDH30 | Bypass from iliac artery                                                                                      |
| PDH35 | Bypass from iliac to femoral artery                                                                           |
| PDH99 | Other bypass from abdominal aorta or iliac artery                                                             |
| PDN10 | Plastic repair of infrarenal abdominal aorta                                                                  |
| PDN30 | Plastic repair of iliac artery                                                                                |
| PDU70 | Exploration of previous reconstruction of infrarenal abdominal aorta or iliac arteries and distal connections |
| PDU74 | Thrombectomy or embolectomy in bypass from infrarenal abdominal aorta or iliac artery                         |
| PDU81 | Closure of persisting arteriovenous fistula of bypass from infrarenal abdominal aorta or iliac artery         |
| PDU82 | Plastic repair of bypass from infrarenal abdominal aorta or iliac artery                                      |
| PDU99 | Other repair after previous reconstruction of infrarenal abdominal aorta and iliac arteries and distal        |
| PDW99 | Other operation on infrarenal abdominal aorta and iliac arteries and distal connections                       |
| PHB23 | Ligature of iliac vein                                                                                        |
| PHB30 | Ligature of inferior vena cava                                                                                |
| PHB31 | Ligature of renal vein                                                                                        |
| PHB32 | Ligature of portal vein                                                                                       |
| PHB33 | Ligature of v. mesenterica superior                                                                           |
| PHB34 | Ligature of v. mesenterica inferior                                                                           |
| PHB36 | Ligature of v. spermatica                                                                                     |
| PHC23 | Suture of iliac vein                                                                                          |
| PHC30 | Suture of inferior vena cava                                                                                  |

| <b>Code</b> | <b>Title</b>                              |
|-------------|-------------------------------------------|
| PHC31       | Suture of renal vein                      |
| PHC32       | Suture of portal vein                     |
| PHC33       | Suture of v. mesenterica superior         |
| PHC34       | Suture of v. mesenterica inferior         |
| PHD30       | Resection of inferior vena cava           |
| PHD32       | Resection of portal vein                  |
| PHD33       | Resection of v. mesenterica superior      |
| PHD34       | Resection of v. mesenterica inferior      |
| PHD36       | Resection of v. spermatica                |
| PHE23       | Thrombectomy of iliac vein                |
| PHE30       | Thrombectomy of inferior vena cava        |
| PHE31       | Thrombectomy of renal vein                |
| PHH25       | Bypass from iliac vein                    |
| PHH30       | Bypass from inferior vena cava            |
| PHN30       | Plastic repair of inferior vena cava      |
| PHN32       | Plastic repair of portal vein             |
| PHN33       | Plastic repair of v. mesenterica superior |
| PHN34       | Plastic repair of v. mesenterica inferior |
| PHW35       | Portosystemic shunt or bypass             |
